# 1 Behaviorally emergent hippocampal place maps remain stable 2 during memory recall

3 Roland Zemla<sup>1,2</sup>, Jason J Moore<sup>1,3</sup>, Jayeeta Basu<sup>1,4,5</sup>

4 <sup>1</sup> Neuroscience Institute, New York University, New York, NY 10016, USA.

5 <sup>2</sup> Medical Scientist Training Program, New York University Grossman School of Medicine, New York, NY  
6 10016, USA.

7 <sup>3</sup> Flatiron Institute, New York, NY 10010, USA

8 <sup>4</sup> Department of Neuroscience and Physiology, New York University Langone Medical Center, New York,  
9 NY 10016, USA.

10 <sup>5</sup> Department of Psychiatry, New York University Langone Medical Center, New York, NY 10016, USA.

11 \*Corresponding Author Jayeeta Basu, [Jayeeta.Basu@nyulangone.org](mailto:Jayeeta.Basu@nyulangone.org)

## 12 13 **Summary**

14 The hippocampus is critical for the formation and recall of episodic memories<sup>1, 2</sup> which  
15 store past experience of events ('what') occurring at particular locations ('where') in time  
16 ('when'). Hippocampal place cells, pyramidal neurons which show location-specific  
17 modulation of firing rates during navigation<sup>3, 4</sup>, together form a spatial representation of  
18 the environment. It has long been hypothesized that place cells serve as the neural  
19 substrate for long-term episodic memory of space<sup>5, 6</sup>. However, recent studies call to  
20 question this tenet of the field by demonstrating unexpected levels of representational  
21 drift in hippocampal place cells with respect to the duration of episodic memories in  
22 mice<sup>7, 8</sup>. In the present study, we examined behaviorally driven long-term organization of  
23 the place map, to resolve the relationship between memory and place cells. Leveraging  
24 the stability of two-photon calcium imaging, we tracked activity of the same set of CA1  
25 pyramidal neurons during learning and memory recall in an operant, head-fixed, odor-  
26 cued spatial navigation task. We found that place cells are rapidly recruited into task-  
27 dependent spatial maps, resulting in emergence of orthogonal as well as overlapping  
28 representations of space. Further, task-selective place cells used a diverse set of  
29 remapping strategies to represent changing task demands that accompany learning.  
30 We found behavioral performance dependent divergence of spatial maps between trial  
31 types occurs during learning. Finally, imaging during remote recall spanning up to 30  
32 days revealed increased stabilization of learnt place cell maps following memory  
33 consolidation. Our findings suggest that a subset of place cells is recruited by rule  
34 based spatial learning, actively reconfigured to represent task-relevant spatial  
35 relationships, and stabilized following successful learning and consolidation.

36

## 37 Introduction

38 The hippocampus plays a critical role in episodic memory formation and recall<sup>9-11</sup>.  
39 Across mammalian species, hippocampal place cells show highly specific firing activity  
40 for distinct locations in space known as ‘place fields’<sup>3, 4</sup>. While originally hypothesized to  
41 serve as a purely navigational mechanism in animals<sup>3</sup>, place cells have since been  
42 implicated in displaying mnemonic activity with regard to environmental context<sup>12-14</sup>,  
43 object/stimulus association<sup>15, 16</sup>, and trajectory planning<sup>17-19</sup>. Place maps may provide a  
44 spatial index (‘where’) for behaviorally-relevant events (‘what’), in service of episodic  
45 memory recall.

46 A central dogma for the cognitive map of space is that, once formed within the structure  
47 of episodic memory, hippocampal place maps should retain stable spatial activity  
48 previously associated with learning during memory retrieval. *In vivo* electrophysiological  
49 recordings in dorsal CA1 in mice performing behaviors with increasing attentional  
50 demand to spatial context revealed the greatest increase in the stability of place cell  
51 units across 6-hour intervals in mice engaged in cue-dependent navigation<sup>5</sup>. However,  
52 long-term imaging studies of place cell activity beyond this interval demonstrated time-  
53 limited place cell reactivation<sup>7, 20</sup> and place field instability<sup>8</sup> in CA1 when mice were  
54 repeatedly exposed to familiar environments. Of note, however, is that none of these  
55 studies, however, examined the activity of place cells during operant behaviors that  
56 require associational learning with long-term memory demands. Thus, while they clearly  
57 show a temporal influence on place map stability, they offer limited understanding of  
58 such dynamics under conditions of memory-dependent behavior.

59 While the hippocampal representations of space must be stable, to enable memory  
60 consolidation and recall, they also need to be flexible to allow for accurate  
61 discrimination and adaptation of learnt behaviors when environmental contexts change.  
62 A key property of place cells is their ability to change their firing fields and/or rates in  
63 response to changes in the spatial environment or salient cues within it. This  
64 phenomenon is referred to as ‘remapping’<sup>13, 21</sup>. Interestingly, place cells in dorsal CA1  
65 can also remap as a result of learning within a constant spatial environment where task  
66 goals, such as reward locations, change but the environment does not. When rats are  
67 trained to learn the location of randomly selected reward locations in an open arena, an  
68 overrepresentation of place fields emerges in CA1 around the reward areas and the  
69 extent of remapping correlates with the performance of the animal<sup>22</sup>. Likewise, goal-  
70 oriented learning along a linear treadmill in head-fixed mice induces place cell  
71 remapping<sup>23</sup>. Reorganization of spatially tuned ensembles in CA1 occurs during  
72 learning of hippocampal-dependent tasks<sup>24</sup> and is associated with storage of spatial  
73 information on both short and long timescales<sup>25</sup>. It is unclear, however, how such spatial  
74 maps evolve into orthogonal representations in a context-dependent manner as a result  
75 of learnt behavior.

76 To fill this gap, we used longitudinal two photon imaging in hippocampal CA1 pyramidal  
77 neurons while mice learnt and performed a spatial navigation task where they had to

78 collect rewards at distinct specific locations based on different cued contexts. This  
79 allowed us to examine mnemonic association of place maps with episodic and  
80 contextual task features across learning and recall. Although existing intrinsic  
81 hippocampal synaptic mechanisms can lead to the progressive turnover of spatial  
82 representations in CA1<sup>7, 22</sup>, we hypothesized that place maps anchored by behavioral  
83 learning rules and spatio-temporally structured attentional demands would result in the  
84 stabilization and maintenance of learnt task-dependent maps following memory  
85 consolidation.

## 86 **Results**

### 87 **Mice learn to reliably perform an odor-cued head-fixed spatial navigation task**

88 To study the time evolution and stability of place cells during episodic memory, we  
89 developed a head-fixed, spatial navigation task guided by odor cues. Mice were  
90 required to navigate to two discrete unmarked reward zones (10 cm each and  
91 separated by ~80 cm) on a ~2-meter linear treadmill, each associated with a distinct  
92 odor that was delivered at the start of the lap (Extended Data Fig. 1). When the animal  
93 received odor A (pentyl acetate), mice had to actively lick in far reward zone A (~140 cm  
94 from lap start, 120 cm from end of odor zone) to receive sucrose water rewards (Fig.  
95 1a). During randomly alternating B trials, when odor B ((+)- $\alpha$ -Pinene) was delivered,  
96 rewards became available in the B reward zone (~60 cm from lap start, 40 cm from end  
97 of odor zone) and likewise the animal was operantly rewarded upon licking in this zone  
98 (Fig. 1a). Correct learning resulted in the animal licking within the trial-appropriate odor-  
99 cued reward zone, while suppressing licking in the alternate trial reward zone. Thus,  
100 during an odor A trial, the animal should navigate to and actively lick in reward zone A  
101 to get sucrose water rewards, while running past and suppressing licking in B reward  
102 zone and its associated anticipatory zone (10 cm prior to reward zone) as well as the  
103 rest of the belt; and vice versa for odor B trials. Successful performance thus required  
104 the animal to execute a spatial trajectory that depended on memory of the odor cue and  
105 sustained spatial attention to execute trial-appropriate lick and lick suppression  
106 behavior. Tracking of lick behavior provided us with a reliable readout of learning and  
107 subsequent accuracy of episodic memory recall.

108 We implemented a training regimen in which animals were advanced to alternating  
109 blocks of serial presentations of A and B trials (stage 1- 5A5B; Stage 2- 3A3B; Stage 3-  
110 random AB) after learning to randomly forage for rewards (Fig. 1b). During random  
111 foraging, the licking behavior of the mice was uniformly distributed (Fig. 1c; green  
112 subpanel), but with learning in the following stages the licking became more restricted to  
113 the respective trial reward zone (Fig. 1c; red and blue subpanels, Fig 1d, Fraction of  
114 licks in respective reward zone, stage 1, 2, 3: A trials:  $0.06 \pm 0.01$ ,  $0.44 \pm 0.07$ ,  $0.71 \pm$   
115  $0.11$ ,  $0.66 \pm 0.1$ ,  $**P = 0.002$ ; B trials:  $0.04 \pm 0.01$ ,  $0.41 \pm 0.05$ ,  $0.6 \pm 0.05$ ,  $0.62 \pm 0.1$ ,  
116  $**P = 0.008$ , mean  $\pm$  s.e.m, one-way RM ANOVA). Once mice learnt the task, they  
117 exhibited consistent trial-appropriate lick and lick suppression behavior indicating  
118 acquisition of distinct episodic and context dependent-memories (Fig. 1e). We observed

119 that at this final learnt stage the mice achieve up to 95% accuracy (Fraction of correct  
120 trials, stage 1, 2, 3: A trials  $0 \pm 0$ ,  $0 \pm 0$ ,  $0.46 \pm 0.27$ ,  $1 \pm 0$ ,  $*P = 0.038$ ; B trials:  $0 \pm 0$ ,  
121  $0.05 \pm 0.03$ ,  $0.12 \pm 0.07$ ,  $0.95 \pm 0.03$ ,  $**P = 0.002$ , mean  $\pm$  s.e.m., one-way RM  
122 ANOVA).

123 To ensure that the animals were navigating toward the trial-appropriate reward zone  
124 rather than relying on a dead-reckoning strategy or a texture cue to obtain sucrose  
125 water rewards, we measured each animal's speed immediately prior to and after entry  
126 into the reward zones (Fig. 1f, Extended Data Fig. 2). As expected, the animal's speed  
127 decreased immediately prior to ( $\sim 1$  s) trial-appropriate reward zone entry following  
128 learning, but did not decrease in the trial-inappropriate reward zone. Furthermore,  
129 animals came to near complete stops within 2 seconds of entering the correct reward  
130 zone, suggesting that the animals developed an odor cue-dependent navigational  
131 strategy to specific areas of the track. In summary, we developed a head-fixed linear-  
132 track based navigation paradigm that allows us to examine episodic, spatial, and  
133 contextual features of memory, similar to those previously described in freely moving  
134 rodents<sup>17, 19</sup>, which enabled us to study the neural transformation of hippocampal spatial  
135 maps under repeated attention and memory demand.

### 136 **Task-selective spatial activity emerges in CA1 following learning**

137 Previous studies examining the activity of CA1 pyramidal neurons in animals performing  
138 episodic navigation revealed that place firing properties are modulated by past and  
139 future behavior of the animal (termed retrospective and prospective coding,  
140 respectively)<sup>17-19</sup>. Such neurons (place cells) that show trial-selective activity appear in a  
141 space segment common to both trials *prior* to the animal navigating to either the left or  
142 right arm of the maze and are hypothesized to facilitate episodic memory recall in the  
143 hippocampus. We reasoned that if our task recruits an episodic memory process, we  
144 would observe such trial-selective activity along the track segment prior to the mouse  
145 licking in either reward zone (i.e. the equivalent common space segment) and possibly  
146 beyond.

147 With this task at hand, we combined the behavior with two photon imaging of  $Ca^{2+}$   
148 activity in the cell bodies of CA1 pyramidal neurons endogenously expressing the  
149 fluorescent  $Ca^{2+}$  indicator GCaMP6f in mice who reached  $>85\%$  learning criteria (in a  
150 cohort of  $n = 10$  animals, Fig. 2a). Alongside neurons that were spatially tuned  
151 irrespectively of trial type, we observed location specific calcium transients in a sub-  
152 population of neurons that were spatially-tuned in a trial-selective manner (Fig. 2b). This  
153 means that there was a sub-group of neurons that were place cells on A trials but not on  
154 B trials, and vice versa. Examination of the mean run-epoch activity rate (area under  
155 curve of calcium transients [AUC]/time) on A vs. B trials revealed that all animals had  
156 three groups of neurons which showed preferential activity for either trial (A-selective or  
157 B-selective) or shared (A&B) activity (Fig. 2c). We observed that the magnitude of the  
158 activity rate was increased more than twofold between laps for preferential A trial and B  
159 trial neurons without noticeable difference in activity for non-selective neurons (Fig. 2c,

160 run epochs). Such effect was not observed during epochs when the animal did not run  
161 for neither trial-selective neurons nor A&B tuned neurons (Fig. 2c, no-run epochs),  
162 suggesting that these neurons were modulated during navigation and incorporated  
163 information about the task contingency (Fig. 2c).

164 To examine the task-dependent spatial tuning of neurons, we used two previously  
165 described metrics to detect place cells: spatial information (S.I.) and tuning specificity  
166 (T.S.)<sup>23, 26</sup>. Each metric has its unique advantage and we used both to maximize  
167 detection accuracy. While spatial information allows for detection of place cells with  
168 single- and multiple place field, it has lower sensitivity for cells with broad, single fields.  
169 On the other hand, tuning specificity is more sensitive (and more specific) to place cells  
170 with single fields regardless of field width at the expense of multi-field cell detection<sup>23</sup>.  
171 Regardless of the place cell classification criteria, each metric revealed the existence of  
172 A-, B- selective as well as trial-nonselective (A&B) place cells in similar fractions as  
173 expected from the activity rate analysis above (Fig. 2d). We noted more A-selective  
174 than B-selective place cells using the S.I. metric and observed a similar trend using the  
175 T.S metric (Fig. 2d), perhaps due to the greater length of the track traversed to arrive at  
176 the A-reward goal location. Using either spatial tuning metric, there were nearly half as  
177 many B-selective neurons as A&B neurons and we similarly observed this trend for A-  
178 selective neurons compared to A&B neurons (Fig. 2d). We combined both tuning criteria  
179 to determine the task-selectivity of place cells (i.e. a selective place cell required tuning  
180 by either criterion in one set of trials and not in the alternate trials). We did not observe  
181 significant speed differences between trials in all the animals we recorded from, with a  
182 mean difference in speed not exceeding  $\pm 5$  cm/s in all spatial bins except for peri-  
183 reward bins (Extended Data Fig. 3). In neurons with task-selective place fields, the  
184 majority of place cells did not show a significant speed difference suggesting that the  
185 selectivity we observed is not due to an effect of speed on  $Ca^{2+}$  activity between trials  
186 (Extended Data Fig. 4a, b). Furthermore, we could not attribute such difference to the  
187 sensitivity of  $Ca^{2+}$  transient detection between trials as GCaMP6f detects single action  
188 potentials *in vivo*<sup>27</sup> and our detection algorithm is optimized for detection of small  
189 transients (see Methods). Taken together, the presence of trial-selective place cells  
190 suggests episodic encoding of space in our task.

191 The task-selective, and thus episodic, nature of place cell activity in our task suggested  
192 that the distribution of place fields along the track would also vary between trials due to  
193 the distinct memory and attention demands associated with navigation to each reward  
194 zone. Both A- and B-selective place cells had place fields that spanned the entire length  
195 of the track (Fig. 2e). However, there was a significant difference in the distribution of  
196 place fields within A trials and B trials for A-only, and B-only task-selective neurons (Fig.  
197 2f). The difference in place field location distribution was also significant between A- and  
198 B-selective neurons (Fig. 2g). We observed an overabundance of place fields within the  
199 common track segment – from lap start until the B reward zone – on both trials  
200 consistent with the greatest behavioral significance of this area in navigating a trial  
201 trajectory (near (B) or far (A) zone destination). Interestingly, there was a greater

202 density of place fields in this segment on B trials with a rapid decline of field density  
203 thereafter in agreement with a shorter B trajectory. In contrast, the distribution of the  
204 longer trajectory A-selective place fields was more uniform across the track with  
205 increasing field density near the distant reward zone. This may imply that the ‘near’  
206 reward zone B is significant in guiding behavioral output choices in both trials, as the  
207 mouse either has to stop and lick for rewards at the near B reward zone for Odor B  
208 trials, whereas actively suppress its licking to cross over that B zone to seek rewards in  
209 the far A zone for Odor A trials. We did not observe a difference in the place field  
210 properties between trials (Extended Data Fig. 4c, d). Lastly, we compared the spatial  
211 tuning curve correlations between A and B trials for A- and B-selective place cells  
212 against shared A&B place cells. We observed low correlation scores for A-selective and  
213 B-selective neurons with no significant difference between them (Fig. 2h), indicating that  
214 activity maps from A- and B-selective neurons discriminate between trial types.  
215 Significantly higher correlation scores were present among the A&B shared place cells  
216 relative to A-selective and B-selective neurons (Fig. 2h). Furthermore, we observed a  
217 broad range of correlation scores among the task-nonselective group – with some  
218 neurons approaching scores similar to those of the task selective neurons – suggesting  
219 that more complex trial-to-trial spatial dynamics exist among this subpopulation.

## 220 **Place cells exhibit dynamic, behaviorally-driven remapping properties between** 221 **trial types**

222 The activity of place cells is most prominently modulated by the location of the animal in  
223 the environment. However, changes in the sensory environment and behavioral  
224 demands can influence the activity of place cells as well<sup>12, 13, 17-19, 21, 28, 29</sup>. This property  
225 has previously been described as ‘remapping’ and is expressed by changes in place  
226 field firing rate and/or place field location, also known as rate and global remapping,  
227 respectively<sup>13</sup>. As the sensory environment in our task remained fixed (except for  
228 changes in odor identity at the lap start), any remapping activity between A and B trials  
229 would reflect behavioral modulation of spatial maps and suggests episodic encoding.

230 To examine the remapping features of A&B shared place cells, we classified each  
231 neuron into one of four remapping categories according to their cross-trial spatial tuning  
232 curve similarly and place field-related calcium activity (Fig. 3a, b). Based on commonly  
233 used nomenclature in the field established through electrophysiology studies<sup>13</sup>, we  
234 defined three classes of remapping neurons: global, activity (in lieu of rate), and partial  
235 remapping (Fig 3b). Global remapping neurons had consistent shifts in place field  
236 location between trials identified by the dissimilarity of their A and B tuning curves  
237 (Extended Data Fig. 5, 6). Among the population of common field place cells (common),  
238 we identified a subset of neurons whose calcium activity was modulated by trial type  
239 that we labeled as activity remapping. These neurons were analogous to firing rate  
240 remapping neurons described in *in vivo* electrophysiological studies<sup>13</sup>. We used a peak  
241 activity modulation index to verify that these neurons indeed represented a subset of  
242 common place cells (Extended Data Fig. 7). Lastly, we identified a unique population of

243 neurons that exhibited what we termed partial remapping. These neurons shared a  
244 common place field between trials, but had an additional place field unique to one trial  
245 type (i.e. partially remapped). All classes of remapping cells were present along the  
246 entire length of the track (Fig. 3c). The greatest fraction of place cells was in the non-  
247 remapping common category, followed by global and partial remapping neurons with a  
248 minority of place cells classified as activity remapping (Fig. 3d). We observed a  
249 significant difference between the fraction of common and activity remapping neurons  
250 and common and partial remapping neurons, while no difference between common and  
251 global remapping neurons (Fig. 3d).

252 Given our observation of task-dependent place cell remapping, we wanted to ask  
253 whether the pattern of spatial remapping correlated with the behavioral demands of  
254 each trial type as we observed for task selective place cells. Our task design introduced  
255 an implicit behavioral gradient with progressively lower memory and attention demands  
256 once the animal had traversed the directed goal location, collected the appropriate  
257 reward and ran toward the end of the track. To link place coding with this behavioral  
258 gradient in our analysis, we split the track into three spatial zones defined by the reward  
259 zones and first examined the distribution of common (non-remapping) place cells.  
260 Common place cells showed a decrease in field density with zone distance (Fig. 3e).  
261 Similar to the distribution of A- and B-selective place cell fields (Fig. 2f), the distance of  
262 the trial trajectories was also conveyed by global remapping place cells with place cells  
263 in zone II on longer trajectory A trials shifting their place fields to earlier locations on  
264 shorter trajectory B trials (Fig. 3f). In contrast, such remapping neither occurred in Zone  
265 I nor Zone III (Fig. 3f). We also observed an inter-zonal, near significant, tendency for  
266 global place cells to preferentially shift their place fields from Zone II on A trials to Zone I  
267 on B trials rather than in the opposite direction and a significant shift of Zone III A place  
268 fields to Zone II on B trials (Fig. 3g). Shifting of place fields within the same zones  
269 occurred at the same frequency in all three zones (data not shown). Partial remapping  
270 neurons likewise showed a trial-dependent trajectory distribution of trial-specific fields  
271 with an overrepresentation of fields in Zone I for both trial types and an additional  
272 overrepresentation of fields around the more distant reward zone on A trials (Fig. 3h).  
273 We also observed that partial remapping neurons with common place fields in Zone II  
274 had an overrepresentation of B trial-specific at earlier locations on the track (data not  
275 shown).

## 276 **Task-dependent spatial maps retain stable activity after learning during recall**

277 Next, we asked whether spatial maps emerging during the task remain stable as the  
278 memory is acquired and consolidated. Previous one-photon and two-photon imaging  
279 experiments of CA1 place cells reported a rapid decorrelation of place maps over  
280 several days<sup>8, 23</sup> under little or variable memory demand. However, *in vivo*  
281 electrophysiological recordings in CA1 revealed a strong association between spatial  
282 map stability and memory- and attention-dependent navigation at 6 hours<sup>5</sup>. To  
283 determine whether place maps are more stable when learnt within the structure of a

284 memory task at longer timescales, we compared the place maps of the same CA1  
285 pyramidal neurons imaged during an accelerated training regimen (learning) against  
286 place maps acquired following consolidated learning (recall) (Fig. 4a). Mice learnt the  
287 task with  $92 \pm 2\%$  accuracy (mean  $\pm$  s.e.m.;  $n = 6$ ) by day 7 on the accelerated regimen  
288 (Fig. 4b), while performance during recall remained consistently between  $\sim 80$ -100%  
289 (Fig. 5d, performance plot). We tracked neurons using an automated ROI registration  
290 algorithm as part of the CalmAn analysis package<sup>30</sup> and manually discarded low quality  
291 matches (Fig. 4c, Extended Data Fig. 8; see Methods for details).

292 Analysis of spatial activity of neurons revealed instability of the network during task  
293 learning in the familiar spatial environment, while the place map network showed  
294 remarkable stability during the recall sessions (Fig. 4d). To quantify spatial task  
295 selectivity across days, we selected all cells that were significantly tuned according to  
296 the tuning specificity (T.S.) criterion on a given session and compared their distribution  
297 across time. We chose the T.S criterion to favor the selection of place cells with single  
298 place fields. Using place cells classified using the spatial information (S.I.) metric  
299 yielded similar results (Extended Data Fig. 9). As early as the first day of training, we  
300 observed trial-selective tuning on A and B trials and a subtle, but statistically  
301 insignificant increase in the fraction of task-selective neurons across time at 6 and 7  
302 days from the start of imaging on A and B trials (Fig. 4e). During recall stage, the task-  
303 specific distribution of place cells remained stable across time on A and B trials (Fig.  
304 4e). Importantly, we observed a significant difference in the stability of place maps at  
305 both the population level and individual place cells matched to the first day of imaging.  
306 The population vector (PV) correlation showed a decorrelation for both learning A and B  
307 trials as well as recall A and B trials, but was substantially lower for the learning cohort  
308 on day 6 and day 7 compared to recall for A and B trials (Fig. 4f). When we specifically  
309 looked at place cells, we observed a rapid tuning curve decorrelation beginning at day 2  
310 for the learning cohort that continued over time on A and B trials as well as for the recall  
311 cohort on A and B trials (Fig. 4f). However, the correlation scores on day 6 and 7 on A  
312 and B trials were significantly lower during learning compared to recall suggesting a  
313 stabilization of spatial representations following learnt consolidation of memory in the  
314 recall cohort.

315 To examine the rate at which the spatial network stabilized, we calculated the  
316 correlation between neighboring day sessions at the level of the population and  
317 individual place cells (Fig. 4g). We reasoned that as the animals learnt the task rules the  
318 activity maps would reach neighboring day scores similar to that of the recall cohort,  
319 which we expected to be fixed following consolidation. We observed that at the  
320 population level (PV score), the learning cohort experienced a time-dependent increase  
321 in neighboring day map similarity, but this was not present in the recall cohort on A or B  
322 trials (Fig. 4g left). In contrast, spatial maps in the learning cohort increased their  
323 neighboring day correlation (TC score) across time on *both* A and B trials, whereas we  
324 did not observe such increase in the recall animals on either A or B trials (Fig. 4g, right).

325 To determine whether there is a shift in the place field locations, as a correlate for  
326 reconfiguration of the network in each trial type, we calculated the mean change of the



327 place field centroids relative to the first imaging session. For A trials, we did not observe  
328 a mean change of centroid location relative to recall animals until day 3 and observed a  
329 progressive increase in the distance of place field centroid remapping thereafter (Fig.  
330 4h). In contrast, B trial place cells maintained a consistently higher rate of place field  
331 centroid shift throughout learning (Fig. 4h). Lastly, we imaged a subset of recall animals  
332 ( $n = 3$ ) over longer term to examine how long can the activity of learnt spatial maps  
333 persist. We observed a surprisingly high level of map stability across 30 days of  
334 imaging, with a progressive, albeit slow, decay in correlation (Extended Data Fig. 10).  
335 Overall, our imaging findings support the idea that learning induces place remapping  
336 that stabilizes in the long-term during recall phases when memory is consolidated.

### 337 **Dissimilarity between task-specific spatial maps predicts performance**

338 While task-modulated place cells appear to be a feature of episodic spatial behavior, the  
339 link between learning and the activity of these maps remains unclear. Inactivation  
340 experiments have shown that the activity of these cells is not necessary for successful  
341 performance on a continuous T-arm alternation maze<sup>31</sup>. On the other hand, shorter-  
342 timescale (during recall) inactivation of CA1 pyramidal neurons has causally linked  
343 place cell maps to memory consolidation<sup>32</sup>. To understand how strongly the rate of  
344 learning is coupled to the rate of task-dependent spatial map divergence, we compared  
345 the A vs. B spatial tuning correlation of place cells tuned in both trial laps (i.e., A&B  
346 tuned) during learning and recall relative to the first day of imaging across time. We  
347 noticed a greater tendency for place cells to split their place fields between tasks during  
348 learning (Fig. 5a) than during recall (Fig. 5b). When we quantified this effect, we  
349 observed a significant decorrelation of the tuning curves of A&B tuned place cells which  
350 progressively increased (i.e. correlation decreased) as the performance of the animals  
351 increased during learning (Fig. 5c). This effect was observed as early as the second day  
352 of imaging and continued until day seven (Fig. 5c). Interestingly, we did not see a  
353 similar decorrelation trend between A&B place cells during recall experiments (Fig. 5d).  
354 Furthermore, we quantified the A vs. B correlation in all place cells as a function of  
355 animal performance across all the imaged sessions and observed a strong inverse  
356 correlation during learning (Fig. 5e). In contrast, we did not observe a significant  
357 correlation during recall (Fig. 5f). Thus, existing spatial maps are remapped to reflect  
358 the degree of task learning in CA1.

359 To further link the differential activity of CA1 neurons to task performance, we used  
360 population vector decoding (see Methods) to read out both the position and the context  
361 (A or B trial) of the mice. For each training session, we used the first half of the session  
362 to train a linear decoder to predict absolute position as well as trial context (A vs B trials)  
363 in the second half (Fig. 6a-d). The decoder's performance was lower in early training  
364 sessions, when behavioral performance was low, compared with later sessions, when  
365 both behavioral performance and decoding accuracy increased (Fig. 6e-f). Notably,  
366 decoder accuracy in distinguishing context A from B was significantly correlated (Fig.  
367 6g) with behavioral performance across all mice, while absolute error in decoding  
368 position was not (Fig. 6h). Thus, we observe that improvement in performance during  
369 training is closely tracked by the ability of the population of neurons to discriminate

370 between the two contexts. Closer inspection revealed that the decoder improved its  
371 ability to distinguish trial context the most around position 110 cm in context A,  
372 immediately before the reward zone for that context (Fig. 6i). Context accuracy was also  
373 lower near the end of trials, in both contexts, but this did not improve with experience.  
374 Errors in absolute position also tended to be higher near the end of trials in both  
375 contexts, as well as immediately after reward zone B experienced in context A (Fig. 6j).  
376 These regions of decreased decoder accuracy correspond to parts of trials with the  
377 most uncertainty in the neural population, which may ultimately contribute to behavioral  
378 errors. The performance of the decoder thus suggests that spatial maps in CA1 do not  
379 require *de novo* mapping of the spatial environment to integrate trial-specific  
380 information, but rather that contextual information becomes integrated with pre-existing  
381 maps during learning.

## 382 **Discussion**

383 In this study, we developed a one-dimensional, head-fixed, odor-cued navigation  
384 behavior to examine hippocampal spatial map dynamics during learning and recall,  
385 similar to freely moving behavioral tasks such as the continuous alternation T-maze<sup>17</sup>.  
386 Our task provides two distinct advantages over previous freely moving studies. First, we  
387 trained animals to learn the task contingency on the exact same belt. This way, we can  
388 ensure hippocampal representation of the task is due to operant learning of a behavior  
389 with defined episodic, spatial and contextual components, rather than the learning of  
390 other strategies such as dead reckoning. Second, we capitalized on ultra-stable two-  
391 photon calcium imaging of the same population of transgenically expressed GCaMP+  
392 neurons to longitudinally track the emergence and remote retrieval of place maps under  
393 this behavioral paradigm. Our results fuel evidence for two long-postulated features of  
394 hippocampal network dynamics: that existing place maps can reconfigure in response to  
395 an associational learning rule despite a constant physical environment, and that such  
396 task selective place maps persist long after learning is achieved.

397 Our data, where we observed emergence of cells with place fields exclusively in  
398 behavioral context A, or B, shows that the hippocampus generated task-selective  
399 representations of space during learning that rapidly remapped as a function of odor-  
400 cued behavioral contingency. Imaging of spatial activity during our task in well-trained  
401 mice revealed a complex set of coding mechanisms for conjunctive representation of  
402 both location and behavioral context. In cells with fields in both behavioral contexts, A  
403 and B, we for the first time observed the calcium analog of two well-described  
404 remapping properties of place cells recorded in freely-moving behavior – rate and global  
405 remapping – whose activity is attributed to changes in context<sup>13, 33</sup> and physical  
406 environment<sup>13, 21</sup>, respectively. Given the structure of our task, where the physical  
407 environment remained constant while the odor-cued behavioral context changed, we  
408 were surprised to see a relatively smaller fraction of activity remapping place cells  
409 (analogous to rate remapping) as compared to global and more complex remapping  
410 cells. There are two possible explanations for this discrepancy. First, despite enhanced

411 sensitivity of the GCaMP6f  $\text{Ca}^{2+}$  indicator<sup>27</sup> used in our imaging, calcium as a proxy for  
412 neuronal activity may not resolve smaller changes in activity rates (or spike modulation)  
413 resulting in an underestimation of rate remapping place cells. We attempt to address  
414 this by using duration and AUC of calcium events as remapping metrics rather than  
415 amplitude, as they better reflect changes in the bursting activity of neurons.  
416 Alternatively, the high proportion of global remapping cells is observed because animals  
417 use different trial specific spatial reference frames to navigate toward reward zones.

418 Our study, along with others, shows that hippocampal “place cells” can modulate their  
419 activity rate or switch their place field tuning in different environments, and even within  
420 the same environment given changes in task demands or goal locations<sup>13, 17-19, 22, 23, 34</sup>.  
421 At the ensemble level, the tuning and density of trial selective place cells are structured  
422 according to the episodic and spatial salience associated with the trial context. Over-  
423 representation of these place fields not only occurs selectively around the trial-  
424 respective reward locations, but in an episodically relevant goal directed manner. For  
425 example, in A-trials, animals must traverse and deliberately withhold licking at the B-  
426 reward zone before reaching the targeted A-reward zone. Following this, place cell  
427 density is high in the cue-sampling, B- and A-reward zones. However, field density for  
428 B-selective place cells drop soon after crossing reward goal location B (Zone I),  
429 signifying the spatio-contextual irrelevance of the rest of the belt for the given trial.

430 In spite of the prominence of place cells (and other feature-selective neurons<sup>15-17, 35-37</sup>)  
431 in the hippocampus, their relationship to learning and execution of learnt behaviors  
432 remain controversial. To directly quantify the behavioral correlates for emergence of  
433 spatial selectivity to temporally structured rule-based learning we used neural decoder.  
434 This allowed us to go beyond the standard prediction of position and context (trial type)  
435 information during learnt behavior<sup>7, 38, 39</sup>. Here, we observed a very strong correlation  
436 between task performance and the accuracy with which the hippocampal map could  
437 predict the location and trial type the animal was in. Very early in learning, absolute  
438 location on the track could be decoded. Only later in learning could behavioral context  
439 be decoded, mirroring rate of learning. Otherwise stated, the transformation of spatial  
440 maps was not associated with a significant loss of spatial information during learning,  
441 but rather with the accuracy with which the network could predict the current trial type at  
442 any given location. Although we hypothesized that the substrate of this learning would  
443 be an increase in the proportion of cells uniquely representing A or B behavioral  
444 contexts, we instead found that the proportion of cells tuned to each behavioral context  
445 did not change significantly. Rather, learning appeared to be driven by increased  
446 distance between place fields of cells jointly representing context A and B.

447 Lastly, in contrast to previous studies that show a high degree of CA1 place cell  
448 instability across time, representational drift was greatly reduced across remote retrieval  
449 sessions, likely because animals were task-engaged rather than randomly foraging.  
450 This stabilization of place maps following learning resolves a debate in the field: how  
451 can the day-to-day instability of place cells reported in recent studies be reconciled with

452 the hypothesis that they serve as the substrate for stable long-term episodic memories.  
453 Our findings expand on previous *in vivo* electrophysiological recordings in CA1, which  
454 first reported the increased stability of place fields during memory-guided, attention-  
455 dependent behavior over a 6 hour interval<sup>5</sup>. In contrast, rapid turnover of spatial map  
456 activity in CA1 was observed in imaging experiments during less structured behaviors  
457 such as random foraging<sup>7, 23</sup>, goal-oriented learning<sup>23</sup>, and non-operantly rewarded  
458 spatial context switching<sup>8, 23</sup>. Our results show such instability of place map activity can  
459 be significantly reduced when the map is embedded within an operant rule-based  
460 learning regimented by contextual, episodic and spatial feature selection. Our result  
461 bolsters the importance of behavioral state on the stability of hippocampal  
462 representations, alongside a growing body of work binding spatial and non-spatial  
463 coding in the hippocampus with learning and attention. For example, learning of a fear  
464 association with a particular environment induces remapping and stabilization of place  
465 cells in the long-term<sup>40</sup>. Olfactory and visuo-spatial representations show enhanced  
466 stability and fidelity for recall with attentional demands<sup>41</sup>. Further, the same ‘odor cells’  
467 in dorsal CA1 are reactivated across days following learning of an olfactory delayed  
468 working-memory task<sup>42</sup>. Beyond the hippocampus, emergence of stable and sparse  
469 representations with learning was observed in the motor cortex<sup>43</sup>.

470 What are the cellular and circuit mechanisms driving the task-specific place cell  
471 dynamics we observe? The olfactory cue context and navigational demands of our task  
472 likely relies on recruiting interactions with lateral entorhinal cortex (LEC)<sup>44, 45</sup> and medial  
473 entorhinal cortex (MEC)<sup>46-55</sup>, but perhaps during distinct task phases. LEC lesions  
474 impairs rate remapping in CA3 place<sup>33</sup>, and may be involved in driving context  
475 dependent remapping<sup>52, 56</sup> during the learning phases of our task. On the other hand,  
476 MEC lesions or input manipulations disrupt place cell precision and stability<sup>57, 58</sup> as well  
477 as place memory although only partially<sup>59</sup>, implicating a role for MEC in the stabilization  
478 of spatial activity following learning. Coordinated activity and integration of entorhinal  
479 cortex and CA3 inputs upon CA1 pyramidal neurons can result in dendritic spikes<sup>60, 61</sup>.  
480 These dendritic spikes have been implicated in context discrimination behavior<sup>61</sup> and  
481 context-dependent place cell formation and remapping<sup>62</sup>, potentially through recruitment  
482 of non-Hebbian plasticity mechanisms like input timing dependent plasticity (ITDP) and  
483 behavioral time-scale dependent plasticity (BTSP), during the learning phase of the  
484 task. Whereas, potential mechanisms driving stabilized ensemble coding in the long  
485 term following learning include Hebbian plasticity rules that involve theta modulated post  
486 synaptic burst firing<sup>63-65</sup>, and experience dependent strengthening of coincident spatially  
487 tuned synaptic inputs<sup>66</sup>.

488 Consistent with previous findings<sup>66, 67</sup>, our trial-by-trial remapping occurs on very fast  
489 timescales, well below the temporal regime of typical plasticity mechanisms. Such a fast  
490 context dependent switch could be supported by specific input gating or gain control  
491 through modulation of inhibitory<sup>67-69</sup> and disinhibitory circuits<sup>61</sup>, and are worth exploring  
492 in the context of our observed behaviorally modulated activity. In terms of stabilization of  
493 subsets of place maps during the remote recall phases of the task, higher order

494 prefrontal cortical (PFC)<sup>70-72</sup>, and subcortical neuromodulatory inputs<sup>5, 73, 74</sup> may be at  
495 play. Reactivation and stabilization<sup>75</sup> of place cell sequences has also been attributed to  
496 highly synchronous sharp-wave ripple (SPW-Rs) activity in CA1. Such, SWRs erupt  
497 during immobility or slow wave sleep in a strongly correlated but time compressed  
498 fashion to prior task performance<sup>22, 76</sup>, future navigation decisions<sup>36, 77</sup>, and perhaps are  
499 at play during the memory consolidation phase of our task.

500 In conclusion, our data shows that the hippocampus rapidly generated task-selective  
501 representations of space during learning. Moreover, the emergent ensembles used both  
502 simple and complex remapping of their activity for alternating between spatial  
503 representations on different trials. Interestingly, while behaviorally-influenced  
504 representations of space emerged early on, these maps continued to evolve towards  
505 progressively more dissimilar cross-trial representations. These were inversely  
506 correlated to increasing animal performance. While much work remains to uncover the  
507 possible cellular and circuit mechanisms driving the experience dependent emergence  
508 and stabilization of place cell ensembles, this novel behavioral paradigm provides a rich  
509 substrate to study flexibility and stability of place maps in episodic and context-  
510 dependent manners.

511

512 **Author contributions:** RZ and JB conceived the project, designed the experiments and  
513 wrote the paper, RZ performed the experiments and data analysis, JJM built the neural  
514 decoder and performed analysis for figure 5 and 6.

515

516 **Acknowledgments** This work was supported by an NIH BRAIN INITIATIVE  
517 1R01NS109994 , an NIH 1R01NS109362-01, McKnight Scholar Award in  
518 Neuroscience, Klingenstein-Simons Fellowship Award in Neuroscience, Alfred P.Sloan  
519 Research Fellowship, Whitehall Research Grant, American Epilepsy Society Junior  
520 Investigator Award, Blas Frangione Young Investigator Research Grant, New York  
521 University Whitehead Fellowship for Junior Faculty in Biomedical and Biological  
522 Sciences and the Leon Levy Foundation Award to JB. RZ was supported by an NYU  
523 Grossman School of Medicine MSTP NIH 5T32 GM007308 grant; JJM was supported  
524 by an HHMI extension grant to Dmitri Chkolvskii. We are indebted to György Buszáki,  
525 Dmitry Rinberg, Vincent Robert, Rachel Swanson, and Olesia Bilash for helpful  
526 discussions on the study and comments on previous versions of the manuscript and  
527 Cara Johnson for proofreading the document.

528

529

530

531

## 532 **Methods**

### 533 **Mice**

534 Experiments were performed with 4-12 month old adult male mice on a C57BL/6J  
535 background transgenically expressing GCaMP6f from the *Thy1* locus (GP5.5 JAX strain  
536 #024276)<sup>78</sup>. All experiments were approved by the Institutional Animal Care and Use  
537 Committee at New York University Medical Center.

### 538 **Hippocampal Window and Headpost Implantation**

539 Mice were implanted with a circular imaging window (3.0 mm x 1.5 mm [diameter x  
540 height]) centered at 2.3 AP and 1.5 ML over the left dorsal-intermediate hippocampus  
541 surrounded by a modified 3-D printed headpost<sup>79</sup> for head fixation. Imaging cannulas  
542 were made by attaching a 3-mm diameter coverslip (64-0720 Warner) to a stainless  
543 steel cylindrical cannula using optical UV curing optical adhesive (NOA-61, Norland  
544 products)<sup>23</sup>.

### 545 ***In Vivo* Two-Photon Imaging**

546 Imaging was performed using a two-photon 8-kHz resonant scanner (Ultima, Bruker)  
547 with a 16x, 0.8 NA water-immersion objective (Nikon). Excitation was performed at 920  
548 nm with an 80 MHz pulsed laser (Mai Tai DeepSee, Spectra Physics). GCaMP6f  
549 emission fluorescence was collected with a GaAsP photomultiplier tube (7422P-40,  
550 Hamamatsu) following red and green channel separation with a filter cube consisting of  
551 a dichroic mirror (T565lpxr, Chroma Technology) and filters (green, ET510/80m-2p; red,  
552 ET605/70m-2p, Chroma Technology). Images were acquired at a 30 Hz frame rate,  
553 512x512 pixel resolution, and 1.5x digital zoom corresponding to a field size of 555  $\mu\text{m}$   
554 x 555  $\mu\text{m}$ .

### 555 **Behavior**

556 *Behavioral apparatus.* Mice ran on a custom-built treadmill track where the belt  
557 consisted of 3 ~65 cm long distinct fabrics (macro-textures) enriched with 4 micro-  
558 textures (5 cm regions consisting of 5 'dice' arranged flattened aluminum foil spheres, 4  
559 crossed hook-and-loop strips, zig-zag glue pattern, and strip of woven material). The  
560 position of the mouse was measured using an optical rotary encoder (S5-720, US  
561 Digital). Lap onset and micro-texture crossings were detected by reading associated  
562 RFID tags with an RFID reader mounted below the animal (ID-20LA, SparkFun  
563 Electronics). Behavior tones of 4 kHz, 10 kHz, and white noise were pre-recorded and  
564 played using an mp3 player (MP3 Player Shield, DEV-12660, SparkFun Electronics).  
565 The audio signal from each channel was then amplified (PAM8302, Adafruit) and played  
566 through a pair of speakers (25-1719S, Tang Band) located on the sides of the fixation  
567 platform. Licking of the animal was registered via a blunt-tipped steel canula coupled to  
568 a capacitive touch sensor (SEN-12041, SparkFun Electronics). Behavioral programs  
569 were controlled with an Arduino Mega 2560 microcontroller. All behavioral data was

570 acquired at a sampling rate of 10 kHz with a data acquisition board (PCI-6052E,  
571 National Instruments) synchronized to the time of frame acquisition.

572 *Olfactometer.* A custom-built olfactometer was used for delivering fixed-concentration,  
573 spatially restricted odors to the mouse (Supplemental Fig.1). Briefly, during non-odor  
574 zone navigation, animals were exposed to a constant background flow of air mixed with  
575 pure mineral oil (BP26291, Fisher Scientific) at a flow rate of 1 L/min. In the immediate  
576 50 cm prior to odor zone entry, an odor charge program was initiated by closing the  
577 normally open (NO) inlet/outlet valves (225T021, NResearch Inc.) along the flow path  
578 through the mineral oil vial (M), while opening the flow path through either odor A or B  
579 vials by activating the respective normally closed (NC) inlet/outlet valves (225T011,  
580 NResearch Inc.). The odor-charged air was routed to an exhaust port during this period  
581 through a 3-way final valve (SH360T041, NResearch Inc.), while 1 L/min of air  
582 continued to be delivered. Charging was performed in order to ensure that a consistent  
583 steady-state concentration of odor was reached along the pre-delivery flow path (before  
584 the final valve) and to minimize latency of odor delivery to the animal. Upon entering the  
585 odor zone, the final valve was triggered via an RFID tag to switch routing of the odor-  
586 charged air from exhaust to the animal's snout. Upon reaching the end of the odor zone,  
587 an RFID tag triggered the closure of either A or B path valves and opening of the  
588 background mineral oil air path. A constant vacuum of 1L/min above the odor delivery  
589 port ensured scavenging of residual odors. 10% dilutions of pentyl acetate (Sigma-  
590 Aldrich, 109584) and (+)- $\alpha$ -Pinene (Sigma-Aldrich, P45680) in mineral oil were used as  
591 odor A and B, respectively. A photoionization detector (200B: miniPID Dispersion  
592 Sensor, Aurora Scientific) was used to verify steady-state odor concentration delivery  
593 prior to each imaging session. A steady-state odor onset latency (baseline to steady-  
594 state) of ~125 ms and off latency of ~75 ms (steady-state to baseline) was measured.  
595 Fresh dilutions of odors were prepared daily.

596 *Random foraging.* Following recovery from surgery (3-5 days), mice were water  
597 deprived and habituated to handling and head-fixation to behavioral apparatus. Water-  
598 deprived mice were then trained to operantly lick and receive 5% sucrose water rewards  
599 in regularly spaced reward zones along a ~196 cm linear track consisting of fabrics and  
600 textures described above. Training began with 20 regularly distributed reward zones  
601 followed by a program of progressively fewer and more randomly distributed reward  
602 zones over 2 weeks. Access to ~1  $\mu$ L sucrose droplets began immediately after entry  
603 into a reward zone and terminated following either an exit from the reward zone (20 cm  
604 initial length), a time-out period (7 s initial duration) that had elapsed since entry, or  
605 once a maximum number of collected rewards had been reached (10 reward initial  
606 limit). Sucrose rewards were delivered on alternate licks. Training was considered  
607 complete once mice ran at a rate of ~1 lap/min in search of 3 random reward zones per  
608 lap, each defined by a 10 cm length, 3 s time-out period, and 5 droplet collection limit.  
609 Animals were given a total of 1 mL of water daily.

610 *Odor-cued spatial navigation task.* Following successful training on random reward  
611 foraging, animals were introduced onto a structured training regimen that consisted of  
612 alternating blocks of A and B trial laps. On the first day of training, animals were placed  
613 on an alternating sequence of A and B laps for 10 trials to familiarize the animal with the  
614 two types of trials. Thereafter, a regimen of 5 sequential A and 5 sequential B laps  
615 (5A5B) was presented in an alternating block pattern which progressed to an alternating  
616 block of 3 A and 3 B laps (3A3B) and finally to randomized lap (random) presentation.  
617 Each rewarded lap was signaled by a 0.5 s 4 kHz tone immediately prior to lap start. If  
618 the animal reached the start of the lap prior to the 0.5 s elapsing, the tone would stop  
619 playing. The odor was delivered across the initial 20 cm segment of the lap. Delivery of  
620 the trial-associated reward was restricted to the 10 cm reward zone, a 3 s collection  
621 time, and a maximum of 10 rewards. Following  $>\sim 80\%$  task performance, incorrect  
622 behavior was punished by time-out laps. When the animal licked in either the  
623 anticipatory (10 cm prior to reward zone) or reward zone not associated with the current  
624 trial, a 0.5 s 10 kHz tone was played, signaling to the animal an incorrect choice. On the  
625 following time-out lap, a 0.5 s white noise was played prior to lap entry, neither odor A  
626 nor B was delivered, and no reward was available.

## 627 **Image processing and signal extraction**

628 *Motion correction and ROI segmentation.* Imaging time-series data was corrected for  
629 motion artifacts by using the NoRMCorre non-rigid motion correction algorithm  
630 implemented in MATLAB<sup>80</sup>. The first imaging session in each longitudinal imaging series  
631 was used as the template against which all future sessions were motion corrected.  
632 Segmentation of somatic regions of interest (ROIs) was performed using a constrained  
633 non-negative matrix factorization (CNMF) approach implemented in MATLAB as part of  
634 the CalmAn software package<sup>30, 81</sup>. Non-somatic and low-quality components were  
635 manually discarded using a custom graphical interface.

636 *Matching components across sessions.* Individually identified somatic ROIs in each  
637 session were matched across sessions by using the *register\_multisession.py* function  
638 as part of the CalmAn Python package. Matched components across all sessions were  
639 subsequently visualized and poorly matching or mismatching components were  
640 discarded. Discarding of component matches was blind to the calcium signal associated  
641 with a component on any given session.

642 *Relative fluorescence change ( $\Delta F/F$ )* The signal baseline ( $F_{0 \text{ baseline}}$ ) was calculated for  
643 each ROI by taking the fluorescence signal and calculating its 50<sup>th</sup> percentile (median)  
644 value at each timepoint within a sliding 15s time window using the *prctfilt.m* function as  
645 part of CalmAn. The same procedure was used to extract the background signal from  
646 the background component ( $F_{0 \text{ background}}$ ). The  $\Delta F/F$  was then calculated as:

$$647 \quad \frac{\Delta F}{F} = \frac{F - F_{0 \text{ baseline}}}{F_{0 \text{ baseline}} + F_{0 \text{ background}}}$$



648 The resultant  $\Delta F/F$  signal was subsequently smoothed using an exponential filter with  
649  $\tau = 0.2s$  to reduce photon shot noise from signal acquisition<sup>82</sup>.

650 *Calcium event detection* Significant calcium events were identified using an algorithm  
651 previously used in the analysis of two-photon, CA1 hippocampal imaging data<sup>23, 83, 84</sup>.  
652 Briefly, for any given  $\Delta F/F$  calcium trace, deflections from the baseline value due to  
653 acquisition noise and/or motion along the dorsoventral (z) axis should occur with equal  
654 frequency in both the positive and negative directions. Based on this assumption, the  
655 false-positive rate can be calculated for each putative event and an amplitude and  
656 duration threshold can be defined such that an event's false-positive event rate does not  
657 exceed 5% (rate at which positive events occur with at least 20-fold higher probability  
658 than negative events). Using this approach, we identified initial putative events by  
659 detecting consecutive imaging frames whose onset occurred at 2 s.d. above the mean  
660 and whose offset occurred at 0.5 s.d. below the mean. All events within a session were  
661 classified according to their amplitude (in 0.5 sigma bins) and duration (in 250 ms bins).  
662 We calculated the false-positive rate for each amplitude-duration bin as the ratio of  
663 negative to positive events in that bin. Only positive events from bins with a false-  
664 positive ratio of less than 5% were included in the analysis.

665 To further improve the sensitivity of event detection, initially detected events were  
666 masked on the original fluorescence signal, the  $F_{0\ baseline}$  was recalculated, and events  
667 were redetected on the updated  $\Delta F/F$  signal. Two iterations of event-masked baseline  
668 recalculation were performed. Events that lasted less than 1 s were excluded from  
669 subsequent analysis.

## 670 **Data analysis**

671 *Definition of run epochs* As described previously<sup>23, 83</sup>, we defined running epochs as  
672 consecutive frames during which the mouse was moving forward with a minimum peak  
673 speed of 5 cm/s for at least 1 s in duration. Neighboring run epochs separated by less  
674 than 0.5 s were merged. All other epochs were defined as no run.

675 *Selection of place cells.*

676 *Spatial information* We identified spatially tuned cells (place cells) by computing their  
677 spatial information content relative to an empirically generated shuffle distribution as  
678 described previously<sup>23, 83</sup>. The spatial information content was defined as<sup>85</sup>:

$$679 \quad I_N = \sum_{i=1}^N \lambda_i \ln \frac{\lambda_i}{\lambda} p_i$$

680 Where  $\lambda_i$  is the transient rate and  $p_i$  is fraction of running time spent in the  $i$ th spatial  
681 bin,  $\lambda$  is the overall transient rate, and  $N$  is the number of bins. The transient rate was  
682 defined as the ratio of the bin count of running-related transient onsets smoothed with a  
683 Gaussian kernel ( $\sigma = 3$  bins) to the spatial bin occupancy time. We computed  $I_N$  for  $N =$   
684 2,4,5,10,20,25,50,100 bins. To create shuffle distributions for each of the  $N$  spatial bins,

685 we randomly reassigned the transient onset times within the running-related epochs  
686 1,000 times and recomputed the spatial information content for each reassignment  $I_N^s$ ,  
687 where  $s$  is the index of the shuffle. To approximately account for the bias associated  
688 with spatial binning in the calculation of the spatial information content, we subtracted  
689 the mean of the shuffled null distribution from each  $N$ -binned estimate to obtain the  
690 adjusted  $I_N$  values:

$$691 \quad \hat{I}_N = I_N - \frac{1}{1000} \sum_{s=1}^{1000} I_N^s$$

692 We then obtained a single estimate of the spatial information content for each neuron by  
693 taking the maximum of the adjusted information values  $\hat{I} = \max_N \hat{I}_N$  for the true transient  
694 onset times and the shuffled onset times  $\hat{I}_s = \max_N \hat{I}_N^s$ . The spatial tuning p-value was  
695 defined as the fraction of shuffle values  $s$  for which  $\hat{I}$  exceeded  $\hat{I}_s$ . Neurons with a  
696 spatial tuning p-value  $< 0.05$  were defined as place cells.

697 *Tuning specificity* We calculated the spatial tuning vector for each cell as described  
698 previously<sup>23</sup> using the formula  $\sum_j \frac{e^{i\theta_j}}{o(\theta_j)}$ , where  $\theta_j$  is the binned position of the mouse ( $N =$   
699 200 bins, 1 bin  $\sim$  1 cm) at the onset time of the  $j^{\text{th}}$  run-epoch transient, and  $o_j$  is the  
700 occupancy of the animal at position  $\theta_j$ , i.e. the fraction of running frames that the animal  
701 spent at position  $\theta_j$ . Calculation of the spatial tuning vector was restricted to only run  
702 epochs as defined above. The tuning specificity was defined as the magnitude of the  
703 spatial tuning vector. Statistical significance of the tuning specificity for each cell was  
704 determined by first generating a null tuning distribution by shuffling the transient onset  
705 times within the run-epoch frames and then computing the tuning specificity from each  
706 shuffle. The shuffle was performed 1,000 times for each cell and the p-value was  
707 defined as the fraction of the null distribution that exceeded the cell's actual tuning  
708 specificity.

709 *Activity rate* We calculated the activity rate as the cumulative area under the  $\Delta F/F$   
710 traces (AUC), from event onset to offset, of all significant calcium events in either run or  
711 no-run epochs and divided this sum by the amount of time the animal spent in  
712 respective epochs.

713 *Place fields* To define the width of place fields, we first calculated the rate map for each  
714 neuron by dividing the run-epoch event count in each spatial bin by the bin occupancy  
715 for  $N = 100$  bins and then smoothed using a Gaussian kernel ( $\sigma = 3$ ). To define spatially  
716 significant fields, we then fit each local maximum in the rate map with a Gaussian and  
717 defined the width as the distance between the locations where each fitted curve was at  
718 20% of its peak value. Putative overlapping fields were merged into single fields. Only  
719 fields with a minimum of 5 significant events on distinct laps were included in the  
720 analysis.

721 *Spatial tuning curves (STC)* The tuning curves were defined as the ratio of a Gaussian-  
722 smoothed ( $\sigma = 3$ ) count of significant run-epoch calcium events in each bin ( $N = 100$ ) to  
723 the run-epoch occupancy. Each neuron's tuning curve was normalized to its maximum  
724 activity across both trial types. For visualization purposes, tuning curves were smoothed  
725 again with a Gaussian kernel ( $\sigma = 3$ ).

## 726 **Task-selective and remapping place cell selection criteria**

727 *Task-selective neurons* Selective neurons were initially chosen as those which were  
728 spatially tuned by either the spatial information or tuning specificity criterion in one set of  
729 trials and by neither in the other set of trials. Only neurons that had at least 5 in-field,  
730 run-epoch calcium events on distinct laps and those in which the animal was in a run  
731 epoch 80% of the time of the equivalent spatial bin range of these calcium events on the  
732 other trial laps were included in analysis.

733 *Common and global remapping neurons* To determine which neurons globally  
734 remapped, we performed a Pearson correlation of their rate maps ( $N = 100$  bins)  
735 between correct A and B laps. Correlation was performed only between spatial bins with  
736 non-zero values in either trial. Neurons that had a positive, statistically significant ( $p$ -  
737 value  $< 0.05$ ) correlation score were classified as common neurons (their spatial maps  
738 were similar), while neurons with non-significant scores ( $p \geq 0.05$ ) or significant  
739 negative scores (maps which are either dissimilar or anti-correlated) were classified as  
740 globally remapping. We verified that the distributions of correlation scores against their  
741  $p$ -values for all common and global neurons separated into two distinct classes  
742 (Supplementary Fig. 6). Only neurons that were tuned according to tuning specificity  
743 were used in the analysis. All cells were required to have a single place field on each  
744 set of trials and at least 5 significant calcium events on distinct laps in their place fields.  
745 Additionally, for globally remapping neurons, animals must have been in a run epoch at  
746 least 80% of the time within the equivalent range of calcium onset bins of the other trials  
747 on at least 6 laps (to ensure that the animal was in a run epoch on both lap types).

748 *Activity remapping neurons* Among the neurons that were selected as common, we  
749 examined the area under the curve (AUC) of in-field calcium events to determine  
750 whether there was a significant variation in activity associated with trial type. Given that  
751 animal speed contributes to CA1 place cell firing activity<sup>86-88</sup>, we performed a 2-way  
752 ANOVA test to determine the effect of task trial type and speed on the AUC of calcium  
753 events. Neurons that had a trial type effect  $p$ -value  $< 0.05$  were classified as activity  
754 remapping. We further confirmed that this category was distinct from the common  
755 population by calculating the difference over sum ratio of the peak of the average of  
756 calcium transients between the in-field events of correct A trials and correct B trials  
757 (Supplementary Fig. 8).

758 *Partial remapping neurons* Neurons with partially remapping fields were selected as  
759 those which met either the spatial information or tuning specificity criterion in both trial  
760 types and had 2 place fields in one type of trials, whereas only 1 place field in the other.

761 For a place field to be considered common across trial types, the distance between the  
762 centroid of the place fields between trial types must have been less than the 95<sup>th</sup>  
763 percentile value of the distribution of the place field centroids for the common neurons.  
764 No threshold was set on the distance of the remapping field centroid from the common  
765 field. As with global remapping neurons, all place fields were required to have at least 5  
766 significant in-field calcium events on distinct laps. For the partial field, the animal must  
767 have been in a run epoch at least 80% of the time within the equivalent range of calcium  
768 onset bins of the other trial type on at least 6 laps.

769 *Population vector correlation* The normalized spatial tuning curves across 100 spatial  
770 bins were assembled for all neurons into a 2D matrix where the rows represented  
771 neuron indexes and columns the activity of all the neurons in each spatial bin. Thus,  
772 each column represented the population activity of all neurons at a particular bin. For  
773 similarity analysis, the population vector in each column was Pearson correlated against  
774 a different trial set or imaging session. The mean of the correlation scores from all bins  
775 was the population vector correlation score.

776 *Tuning vector correlation* Between spatially tuned neurons on any two sessions, the  
777 spatial tuning vectors across 100 bins were Pearson correlated for each neuron and the  
778 mean of all correlated neurons was the tuning vector correlation score.

## 779 **Population Vector Decoding**

780 To demonstrate the relationship between behavioral performance and tuning fidelity of  
781 our recorded neurons, we performed population vector decoding (Fig. 6). A separate  
782 decoder was constructed for each session for each mouse. For a given session,  
783 template tuning curves for each cell were constructed in a similar manner as described  
784 above, only using data when mice were running. Briefly, we divided the 200 cm track  
785 into 40 bins each for A and B trials (80 bins total), counted the number of calcium  
786 events in each bin, and smoothed with a Gaussian smoothing kernel with  $\sigma = 5$  cm, then  
787 divided by the total time spent in each bin. Data from the first half of the session was  
788 used to define the template. Time-varying rate vectors for each cell were constructed  
789 using data from the second half of the session using 250 ms bins, smoothed with a  
790 Gaussian smoothing kernel with sigma  $\sigma = 250$  ms. For each time point in the second  
791 half of the session, the decoded position was the position corresponding to the highest  
792 correlation with the template matrix.

793 The performance of the decoder was quantified using two measures: “Decoding Score”  
794 and “Decoding Error.” Decoding score (Fig. 6c, e, f, g, i) was defined as the proportion  
795 of data points that were correctly classified as belonging to A or B trials. Decoding Error  
796 (Fig. 6d, h, j) was defined as the mean absolute distance between the decoded and  
797 actual position when ignoring trial type. Distance was defined in a circular manner such  
798 that positions 0 and 200 were at the same point.

799 *Spatial raster plots.* Lap-by-lap raster plots were made by taking the mean run-epoch  
800  $\Delta F/F$  value from 100 spatial bins for each place cell.

801 *Statistics* Statistical analysis of calcium data was done using Matlab R2020a  
802 (Mathworks).

803 *Software*: All analysis was done using custom-written scripts in MATLAB R2020a  
804 (Mathworks). Scripts are available on request from R.Z. and J.B.

805

## 806 **References**

- 807 1. Tulving, E. *Elements of Episodic Memory* (Oxford University Press, 1985).
- 808 2. Tulving, E. Episodic Memory: From Mind to Brain. *Annual Review of Psychology*  
809 **53**, 1-25 (2002).
- 810 3. O'Keefe, J. *The hippocampus as a cognitive map / John O'Keefe and Lynn Nadel*  
811 (Clarendon Press ; Oxford University Press, Oxford : New York, 1978).
- 812 4. O'Keefe, J. & Dostrovsky, J. The hippocampus as a spatial map. Preliminary  
813 evidence from unit activity in the freely-moving rat. *Brain Research* **34**, 171-175  
814 (1971).
- 815 5. Kentros, C.G., *et al.* Increased Attention to Spatial Context Increases Both Place  
816 Field Stability and Spatial Memory. *Neuron* **42**, 283-295 (2004).
- 817 6. Kentros, C. Hippocampal place cells: The “where” of episodic memory?  
818 *Hippocampus* **16**, 743-754 (2006).
- 819 7. Ziv, Y., *et al.* Long-term dynamics of CA1 hippocampal place codes. *Nature*  
820 *Neuroscience* **16**, 264 (2013).
- 821 8. Hainmueller, T. & Bartos, M. Parallel emergence of stable and dynamic memory  
822 engrams in the hippocampus. *Nature* **558**, 292-296 (2018).
- 823 9. Scoville, W.B. & Milner, B. Loss of recent memory after bilateral hippocampal  
824 lesions. *Journal of Neurology, Neurosurgery & Psychiatry* **20**, 11-21 (1957).
- 825 10. Tulving, E. & Markowitsch, H.J. Episodic and declarative memory: Role of the  
826 hippocampus. *Hippocampus* **8**, 198-204 (1998).
- 827 11. Rolls, E.T. A computational theory of episodic memory formation in the  
828 hippocampus. *Behavioural Brain Research* **215**, 180-196 (2010).
- 829 12. Markus, E.J., *et al.* Interactions between location and task affect the spatial and  
830 directional firing of hippocampal neurons. *The Journal of Neuroscience* **15**, 7079  
831 (1995).
- 832 13. Leutgeb, S., *et al.* Independent Codes for Spatial and Episodic Memory in  
833 Hippocampal Neuronal Ensembles. *Science* **309**, 619 (2005).
- 834 14. Muller, R.U. & Kubie, J.L. The effects of changes in the environment on the  
835 spatial firing of hippocampal complex-spike cells. *The Journal of Neuroscience* **7**,  
836 1951 (1987).
- 837 15. Komorowski, R.W., Manns, J.R. & Eichenbaum, H. Robust Conjunctive Item–  
838 Place Coding by Hippocampal Neurons Parallels Learning What Happens  
839 Where. *The Journal of Neuroscience* **29**, 9918 (2009).
- 840 16. Wood, E.R., Dudchenko, P.A. & Eichenbaum, H. The global record of memory in  
841 hippocampal neuronal activity. *Nature* **397**, 613-616 (1999).
- 842 17. Wood, E.R., Dudchenko, P.A., Robitsek, R.J. & Eichenbaum, H. Hippocampal  
843 Neurons Encode Information about Different Types of Memory Episodes  
844 Occurring in the Same Location. *Neuron* **27**, 623-633 (2000).

- 845 18. Ferbinteanu, J. & Shapiro, M.L. Prospective and Retrospective Memory Coding  
846 in the Hippocampus. *Neuron* **40**, 1227-1239 (2003).
- 847 19. Frank, L.M., Brown, E.N. & Wilson, M. Trajectory Encoding in the Hippocampus  
848 and Entorhinal Cortex. *Neuron* **27**, 169-178 (2000).
- 849 20. Hayashi, Y. NMDA Receptor-Dependent Dynamics of Hippocampal Place Cell  
850 Ensembles. *The Journal of Neuroscience* **39**, 5173 (2019).
- 851 21. Leutgeb, S., *et al.* Distinct ensemble codes in hippocampal areas CA3 and CA1.  
852 *Science* **305**, 1295-1298 (2004).
- 853 22. Dupret, D., O'Neill, J., Pleydell-Bouverie, B. & Csicsvari, J. The reorganization  
854 and reactivation of hippocampal maps predict spatial memory performance.  
855 *Nature Neuroscience* **13**, 995-1002 (2010).
- 856 23. Danielson, N.B., *et al.* Sublayer-Specific Coding Dynamics during Spatial  
857 Navigation and Learning in Hippocampal Area CA1. *Neuron* **91**, 652-665 (2016).
- 858 24. Whitlock, J.R., Heynen, A.J., Shuler, M.G. & Bear, M.F. Learning induces long-  
859 term potentiation in the hippocampus. *science* **313**, 1093-1097 (2006).
- 860 25. Pastalkova, E., *et al.* Storage of spatial information by the maintenance  
861 mechanism of LTP. *science* **313**, 1141-1144 (2006).
- 862 26. Skaggs, W.E., McNaughton, B.L., Wilson, M.A. & Barnes, C.A. Theta phase  
863 precession in hippocampal neuronal populations and the compression of  
864 temporal sequences. *Hippocampus* **6**, 149-172 (1996).
- 865 27. Chen, T.-W., *et al.* Ultrasensitive fluorescent proteins for imaging neuronal  
866 activity. *Nature* **499**, 295-300 (2013).
- 867 28. Muller, R. A Quarter of a Century of Place Cells. *Neuron* **17**, 813-822 (1996).
- 868 29. Muller, R.U., *et al.* Spatial firing correlates of neurons in the hippocampal  
869 formation of freely moving rats. in *Brain and space*. 296-333 (Oxford University  
870 Press, New York, NY, US, 1991).
- 871 30. Giovannucci, A., *et al.* CalmAn an open source tool for scalable calcium imaging  
872 data analysis. *eLife* **8**, e38173 (2019).
- 873 31. Ainge, J.A., van der Meer, M.A.A., Langston, R.F. & Wood, E.R. Exploring the  
874 role of context-dependent hippocampal activity in spatial alternation behavior.  
875 *Hippocampus* **17**, 988-1002 (2007).
- 876 32. Goshen, I., *et al.* Dynamics of Retrieval Strategies for Remote Memories. *Cell*  
877 **147**, 678-689 (2011).
- 878 33. Lu, L., *et al.* Impaired hippocampal rate coding after lesions of the lateral  
879 entorhinal cortex. *Nature neuroscience* **16**, 1085 (2013).
- 880 34. Leutgeb, J.K., *et al.* Progressive Transformation of Hippocampal Neuronal  
881 Representations in  $\epsilon$ -Morphed Environments. *Neuron* **48**, 345-  
882 358 (2005).
- 883 35. Aronov, D., Nevers, R. & Tank, D.W. Mapping of a non-spatial dimension by the  
884 hippocampal-entorhinal circuit. *Nature* **543**, 719-722 (2017).
- 885 36. Pastalkova, E., Itskov, V., Amarasingham, A. & Buzsáki, G. Internally Generated  
886 Cell Assembly Sequences in the Rat Hippocampus. **321**, 1322-1327 (2008).
- 887 37. MacDonald, Christopher J., Lepage, Kyle Q., Eden, Uri T. & Eichenbaum, H.  
888 Hippocampal "Time Cells" Bridge the Gap in Memory for Discontiguous Events.  
889 *Neuron* **71**, 737-749 (2011).

- 890 38. Rubin, A., Geva, N., Sheintuch, L. & Ziv, Y. Hippocampal ensemble dynamics  
891 timestamp events in long-term memory. *eLife* **4**, e12247 (2015).
- 892 39. Brown, E.N., *et al.* A Statistical Paradigm for Neural Spike Train Decoding  
893 Applied to Position Prediction from Ensemble Firing Patterns of Rat Hippocampal  
894 Place Cells. **18**, 7411-7425 (1998).
- 895 40. Wang, M.E., *et al.* Long-Term Stabilization of Place Cell Remapping Produced by  
896 a Fearful Experience. *The Journal of Neuroscience* **32**, 15802 (2012).
- 897 41. Muzzio, I.A., *et al.* Attention Enhances the Retrieval and Stability of Visuospatial  
898 and Olfactory Representations in the Dorsal Hippocampus. *PLOS Biology* **7**,  
899 e1000140 (2009).
- 900 42. Taxidis, J., *et al.* Emergence of stable sensory and dynamic temporal  
901 representations in the hippocampus during working memory. 474510 (2018).
- 902 43. Peters, A.J., Chen, S.X. & Komiyama, T. Emergence of reproducible  
903 spatiotemporal activity during motor learning. *Nature* **510**, 263-267 (2014).
- 904 44. Xu, W. & Wilson, D.A. Odor-evoked activity in the mouse lateral entorhinal  
905 cortex. *Neuroscience* **223**, 12-20 (2012).
- 906 45. Leitner, F.C., *et al.* Spatially segregated feedforward and feedback neurons  
907 support differential odor processing in the lateral entorhinal cortex. *Nature*  
908 *Neuroscience* **19**, 935-944 (2016).
- 909 46. Miao, C., *et al.* Hippocampal Remapping after Partial Inactivation of the Medial  
910 Entorhinal Cortex. *Neuron* **88**, 590-603 (2015).
- 911 47. Sargolini, F., *et al.* Conjunctive Representation of Position, Direction, and  
912 Velocity in Entorhinal Cortex. *Science* **312**, 758-762 (2006).
- 913 48. Fyhn, M., *et al.* Spatial Representation in the Entorhinal Cortex. *Science* **305**,  
914 1258-1264 (2004).
- 915 49. Hafting, T., *et al.* Microstructure of a spatial map in the entorhinal cortex. *Nature*  
916 **436**, 801-806 (2005).
- 917 50. Stensola, H., *et al.* The entorhinal grid map is discretized. *Nature* **492**, 72-78  
918 (2012).
- 919 51. Deshmukh, S. & Knierim, J. Representation of Non-Spatial and Spatial  
920 Information in the Lateral Entorhinal Cortex. **5** (2011).
- 921 52. Neunuebel, J.P., Yoganarasimha, D., Rao, G. & Knierim, J.J. Conflicts between  
922 Local and Global Spatial Frameworks Dissociate Neural Representations of the  
923 Lateral and Medial Entorhinal Cortex. **33**, 9246-9258 (2013).
- 924 53. Knierim, J.J., Neunuebel, J.P. & Deshmukh, S.S. Functional correlates of the  
925 lateral and medial entorhinal cortex: objects, path integration and local-global  
926 reference frames. *Philos Trans R Soc Lond B Biol Sci* **369**, 20130369-20130369  
927 (2013).
- 928 54. Deshmukh, S.S., Yoganarasimha, D., Voicu, H. & Knierim, J.J. Theta Modulation  
929 in the Medial and the Lateral Entorhinal Cortices. *Journal of Neurophysiology*  
930 **104**, 994-1006 (2010).
- 931 55. Kropff, E., Carmichael, J.E., Moser, M.-B. & Moser, E.I. Speed cells in the medial  
932 entorhinal cortex. *Nature* **523**, 419-424 (2015).
- 933 56. Wang, C., *et al.* Egocentric coding of external items in the lateral entorhinal  
934 cortex. *Science* **362**, 945-949 (2018).

- 935 57. Jacob, P.-Y., *et al.* Medial entorhinal cortex lesions induce degradation of CA1  
936 place cell firing stability when self-motion information is used. *Brain and*  
937 *Neuroscience Advances* **4**, 2398212820953004 (2020).
- 938 58. Bittner, K.C., *et al.* Conjunctive input processing drives feature selectivity in  
939 hippocampal CA1 neurons. *Nature Neuroscience* **18**, 1133-1142 (2015).
- 940 59. Hales, Jena B., *et al.* Medial Entorhinal Cortex Lesions Only Partially Disrupt  
941 Hippocampal Place Cells and Hippocampus-Dependent Place Memory. *Cell*  
942 *Reports* **9**, 893-901 (2014).
- 943 60. Kamondi, A., Acsády, L. & Buzsáki, G. Dendritic Spikes Are Enhanced by  
944 Cooperative Network Activity in the Intact Hippocampus. **18**, 3919-3928 (1998).
- 945 61. Basu, J., *et al.* Gating of hippocampal activity, plasticity, and memory by  
946 entorhinal cortex long-range inhibition. *Science* **351**, aaa5694 (2016).
- 947 62. Bittner, K.C., *et al.* Behavioral time scale synaptic plasticity underlies CA1 place  
948 fields. **357**, 1033-1036 (2017).
- 949 63. Epsztein, J., Lee, A.K., Chorev, E. & Brecht, M. Impact of Spikelets on  
950 Hippocampal CA1 Pyramidal Cell Activity During Spatial Exploration. *Science*  
951 **327**, 474-477 (2010).
- 952 64. Epsztein, J., Brecht, M. & Lee, Albert K. Intracellular Determinants of  
953 Hippocampal CA1 Place and Silent Cell Activity in a Novel Environment. *Neuron*  
954 **70**, 109-120 (2011).
- 955 65. Lee, D., Lin, B.-J. & Lee, A.K. Hippocampal Place Fields Emerge upon Single-  
956 Cell Manipulation of Excitability During Behavior. *Science* **337**, 849-853 (2012).
- 957 66. Cohen, J.D., Bolstad, M. & Lee, A.K. Experience-dependent shaping of  
958 hippocampal CA1 intracellular activity in novel and familiar environments. *eLife* **6**,  
959 e23040 (2017).
- 960 67. Sheffield, M.E.J., Adoff, M.D. & Dombeck, D.A. Increased Prevalence of Calcium  
961 Transients across the Dendritic Arbor during Place Field Formation. *Neuron* **96**,  
962 490-504.e495 (2017).
- 963 68. Lovett-Barron, M., *et al.* Dendritic Inhibition in the Hippocampus Supports Fear  
964 Learning. *Science* **343**, 857-863 (2014).
- 965 69. Turi, G.F., *et al.* Vasoactive Intestinal Polypeptide-Expressing Interneurons in the  
966 Hippocampus Support Goal-Oriented Spatial Learning. *Neuron* **101**, 1150-  
967 1165.e1158 (2019).
- 968 70. Preston, Alison R. & Eichenbaum, H. Interplay of Hippocampus and Prefrontal  
969 Cortex in Memory. *Current Biology* **23**, R764-R773 (2013).
- 970 71. Spellman, T., *et al.* Hippocampal–prefrontal input supports spatial encoding in  
971 working memory. *Nature* **522**, 309 (2015).
- 972 72. Rajasethupathy, P., *et al.* Projections from neocortex mediate top-down control of  
973 memory retrieval. *Nature* **526**, 653-659 (2015).
- 974 73. Solari, N. & Hangya, B. Cholinergic modulation of spatial learning, memory and  
975 navigation. *Eur J Neurosci* **48**, 2199-2230 (2018).
- 976 74. Kaufman, A.M., Geiller, T. & Losonczy, A. A Role for the Locus Coeruleus in  
977 Hippocampal CA1 Place Cell Reorganization during Spatial Reward Learning.  
978 *Neuron* **105**, 1018-1026.e1014 (2020).
- 979 75. Roux, L., *et al.* Sharp wave ripples during learning stabilize the hippocampal  
980 spatial map. *Nature Neuroscience* **20**, 845 (2017).



- 981 76. Jadhav, S.P., Kemere, C., German, P.W. & Frank, L.M. Awake Hippocampal  
982 Sharp-Wave Ripples Support Spatial Memory. **336**, 1454-1458 (2012).
- 983 77. Ito, H.T., *et al.* A prefrontal–thalamo–hippocampal circuit for goal-directed spatial  
984 navigation. *Nature* **522**, 50 (2015).
- 985 78. Dana, H., *et al.* Thy1-GCaMP6 Transgenic Mice for Neuronal Population Imaging  
986 In Vivo. *PLOS ONE* **9**, e108697 (2014).
- 987 79. Osborne, J.E. & Dudman, J.T. RIVETS: A Mechanical System for In Vivo and In  
988 Vitro Electrophysiology and Imaging. *PLOS ONE* **9**, e89007 (2014).
- 989 80. Pnevmatikakis, E.A. & Giovannucci, A. NoRMCorre: An online algorithm for  
990 piecewise rigid motion correction of calcium imaging data. *Journal of*  
991 *Neuroscience Methods* **291**, 83-94 (2017).
- 992 81. Pnevmatikakis, Eftychios A., *et al.* Simultaneous Denoising, Deconvolution, and  
993 Demixing of Calcium Imaging Data. *Neuron* **89**, 285-299 (2016).
- 994 82. Jia, H., Rochefort, N.L., Chen, X. & Konnerth, A. In vivo two-photon imaging of  
995 sensory-evoked dendritic calcium signals in cortical neurons. *Nature Protocols* **6**,  
996 28-35 (2011).
- 997 83. Zaremba, J.D., *et al.* Impaired hippocampal place cell dynamics in a mouse  
998 model of the 22q11.2 deletion. *Nature Neuroscience* **20**, 1612-1623 (2017).
- 999 84. Dombeck, D.A., *et al.* Imaging Large-Scale Neural Activity with Cellular  
1000 Resolution in Awake, Mobile Mice. *Neuron* **56**, 43-57 (2007).
- 1001 85. Skaggs, W.E., McNaughton, B.L. & Gothard, K.M. An Information-Theoretic  
1002 Approach to Deciphering the Hippocampal Code. in *Advances in Neural*  
1003 *Information Processing Systems 5, [NIPS Conference]* 1030-1037 (Morgan  
1004 Kaufmann Publishers Inc., 1993).
- 1005 86. McNaughton, B., Barnes, C.A. & O'Keefe, J. The contributions of position,  
1006 direction, and velocity to single unit activity in the hippocampus of freely-moving  
1007 rats. *Experimental brain research* **52**, 41-49 (1983).
- 1008 87. Ekstrom, A., Meltzer, J., McNaughton, B. & Barnes, C.A. NMDA receptor  
1009 antagonism blocks experience-dependent expansion of hippocampal “place  
1010 fields”. *Neuron* **31**, 631-638 (2001).
- 1011 88. Czurkó, A., Hirase, H., Csicsvari, J. & Buzsáki, G. Sustained activation of  
1012 hippocampal pyramidal cells by ‘space clamping’in a running wheel. *European*  
1013 *Journal of Neuroscience* **11**, 344-352 (1999).

1014

1015

## 1016 **Figure Legends**

### 1017 **Fig. 1: Stable learning of a head-fixed, odor-cued spatial navigation task.**

1018 (a) Schematic illustrating task structure. During A trials (top row), mice were presented  
1019 with odor A in a 20 cm cue zone at the onset of the track and ran 120 cm toward the A  
1020 reward zone (blue patch) to collect 5% sucrose water, while suppressing licking  
1021 immediately prior to (anticipatory zone) and inside of the B reward zone (red patch)  
1022 along the way. In contrast, during B trials (bottom row), mice were presented with odor  
1023 B in the cue zone and ran 40 cm to collect reward within the B reward zone. Following  
1024 reward collection in B zone, mice were required to suppress lick in the A anticipatory  
1025 and reward zone for the trial to be registered as correct. Four distinctive micro-textures  
1026 were placed along the track to aid the mouse in spatial navigation and promote place  
1027 cell formation. A 2 kHz tone was played immediately prior to the start of each A or B lap  
1028 to signal that the upcoming trial will be rewarded (as opposed to a non-rewarded time-  
1029 out lap). (b) Schematic of the timeline for each respective stage of training. Animals  
1030 were initially trained for 2 weeks to randomly forage, after which they spent ~1 week on  
1031 each subsequent stage. (c) Example licking distribution from an animal at each of the  
1032 four stages of learning. At the random foraging stage, when the animal learned to lick  
1033 and run, the licking was distributed along the track with no specific enrichment in either  
1034 the A (blue shade) or B reward zone (red shade). As the animal progressed through  
1035 each stage of training, licking become more specific to the reward zone associated with  
1036 that trial (left: A trial laps, right: B trial laps). Circular gray arrows at each stage denote  
1037 repeated training sessions on different days. (d) The fraction of licks in associated  
1038 reward zones increased in A and B trials during learning (**fraction of licks, RF vs.**  
1039 **Random AB**, paired t-test: **A zone**,  $0.06 \pm 0.01$  vs.  $0.66 \pm 0.1$ ,  $*P = 0.031$ ; **B zone**  $0.04$   
1040  $\pm 0.01$  vs.  $0.62 \pm 0.1$ ,  $*P = 0.037$ ; **effect of training stage**, One-way RM ANOVA, **A**  
1041 **trials**  $F_{1,506, 4.51} = 12.44$ ,  $*P = 0.017$ , **B trials**  $F_{1,451, 4.354} = 19.01$ ,  $**P = 0.008$ ). (e)  
1042 Behavioral performance reached >85% only in last stage of training (**fraction of correct**  
1043 **trials, RF vs. Random AB**, paired t-test, **A trials**:  $0 \pm 0$  vs.  $1 \pm 0$ ,  $*P = 0.04$ , **B trials**,  $0$   
1044 vs.  $0.95 \pm 0.03$ ,  $***P < 0.001$ ; **effect of training stage**, one-way RM ANOVA, **A trials**,  
1045  $F_{1,3} = 12.71$ ,  $t_3 = -\infty$ ,  $p^{***} < 0.001$ , **B trials**:  $F_{1,004, 3.012} = 93.36$ ,  $**P = 0.002$ ). (f) Example  
1046 speed of an animal within  $\pm 2$  s of entering the reward zones across training stages. At  
1047 the final training stage (random AB), the animal stops upon entry into a trial-associated  
1048 reward zone, while running through the non-rewarded zone. Dotted gray line indicates  
1049 onset time of reward zone entry. Error bars and error shades indicate mean  $\pm$  s.e.m.  
1050 Data shown from  $n = 4$  mice.

### 1051 **Fig. 2: Task-selective place cells are observed in dorsal CA1 during stable** 1052 **performance.**

1053 (a-i) (Top) Example field of view (FOV) of the pyramidal cell layer imaged in CA1. Image  
1054 depicts the mean intensity projection. (a-ii) Maximum intensity projection of temporally  
1055 downsampled run-epoch imaging stacks. Blue overlay represents odor A trials, while  
1056 red overlay represents odor B trials. Neurons active in both trial types are shown in

1057 magenta. (a-iii) Overlay of maximum intensity projection (a-ii) with imaging FOV (a-i).  
1058 (Bottom) Training timeline of mice. Mice were allowed to recover for 5 days from cranial  
1059 window surgery and then were trained to run and collect rewards from randomly  
1060 distributed zones across linear belt (RF – random foraging). Following ~2 weeks of RF  
1061 training, mice were transitioned to training on the odor-cued spatial navigation task and  
1062 imaging began once animals performed at >85% performance for 3 consecutive days.  
1063 (b) Examples of task selective and non-selective place cells. (1,2) Example of a task-  
1064 selective place cell on A and B trials, respectively. (3) Example of a non-selective place  
1065 cell (with place fields on both A and B trials). Numbers correspond to circled neurons in  
1066 (a). (c) (left) Calcium activity rate (AUC [area under curve]/min) of A-, B-, and task non-  
1067 selective place cells during run epochs. Each point represents the mean from all  
1068 neurons for each of 11 FOVs from  $n = 10$  animals. (right) Activity of task-selective  
1069 neurons is greater on their respective task laps during run epochs (**A vs. B lap activity**  
1070 **rate, A-selective:**  $4.84 \pm 0.47$  vs.  $0.7 \pm 0.16$ , paired Wilcoxon signed-rank test,  $W_{10} =$   
1071  $66$ ,  $**P = 0.003$ ; **B-selective:**  $0.51 \pm 0.07$  vs.  $5.18 \pm 0.55$ , paired Wilcoxon signed-rank  
1072 test,  $W_{10} = -66$ ,  $**P = 0.003$ ; **non-selective:**  $5.77 \pm 0.44$  vs.  $6.08 \pm 0.56$ , paired  
1073 Wilcoxon signed-rank test,  $W_{10} = -30$ ,  $P = 0.206$ ), while no difference is observed during  
1074 no run epochs (**A-selective:**  $0.68 \pm 0.1$  vs.  $0.46 \pm 0.06$ , paired Wilcoxon signed-rank  
1075 test,  $W_{10} = 46$ ,  $P = 0.082$ ; **B-selective**  $0.31 \pm 0.05$  vs.  $0.82 \pm 0.15$ , paired Wilcoxon  
1076 signed-rank test,  $W_{10} = -62$ ,  $**P = 0.009$ ; **non-selective:**  $0.55 \pm 0.05$  vs.  $0.74 \pm 0.13$ ,  
1077 paired Wilcoxon signed-rank test,  $W_{10} = -32$ ,  $P = 0.175$ ). (d) (left) Fraction of place cells  
1078 tuned according to spatial information (S.I.) and tuning specificity (T.S.) showed distinct  
1079 distributions between trials (**S.I. fraction:** Friedman test,  $\chi_3^2 = 29.95$ ,  $***P < 0.001$ ; **T.S.**  
1080 **fraction:** Friedman test,  $\chi_3^2 = 27.33$ ,  $***P < 0.001$ ). More A- than B-selective neurons  
1081 were generally present using the S.I. score (**fraction of A vs. B:**  $0.13 \pm 0.01$  vs.  $0.1 \pm$   
1082  $0.01$ , paired Wilcoxon signed-rank test,  $W_{10} = 54$ ,  $*P = 0.014$ ) and T.S. score ( $0.19 \pm$   
1083  $0.01$  vs.  $0.15 \pm 0.01$ , paired Wilcoxon signed-rank test,  $W_{10} = 48$ ,  $*P = 0.032$ ). Both A-  
1084 and B-selective were fewer in number compared to A&B neurons using the S.I. score (**A**  
1085 **vs. A&B:**  $0.13 \pm 0.01$  vs.  $0.5 \pm 0.03$ , paired Wilcoxon signed-rank test,  $W_{10} = -66$ ,  $**P =$   
1086  $0.003$ ; **B vs. A&B:**  $0.1 \pm 0.01$  vs.  $0.5 \pm 0.03$ , paired Wilcoxon signed-rank test,  $W_{10} = -$   
1087  $66$ ,  $**P = 0.003$ ) and T.S. score (**A vs. A&B:**  $0.19 \pm 0.01$  vs.  $0.32 \pm 0.02$ , paired  
1088 Wilcoxon signed-rank test,  $W_{10} = -66$ ,  $**P = 0.003$ ; **B vs. A&B:**  $0.15 \pm 0.01$  vs.  $0.32 \pm$   
1089  $0.02$ , paired Wilcoxon signed-rank test,  $W_{10} = -66$ ,  $**P = 0.003$ ). Error bars represent  
1090 mean  $\pm$  s.e.m. (center). Mean spatial information scores (bits/Ca<sup>2+</sup> event) and tuning  
1091 specificity score for each class of neurons on A and B laps during each session. (right)  
1092 Spatial information and tuning specificity scores from all imaged neurons (5158  
1093 neurons). (e) Rate maps from all the mice for A- and B- task selective place cells on A  
1094 and B laps. The rate of each neuron is normalized to its maximum rate across both trial  
1095 types. A-selective neurons (top) are sorted according to their maximum rate across 100  
1096 spatial bins on A laps. The same sorting was performed on B-selective neurons  
1097 (bottom) on B laps. Green dashed line indicates the end of odor zone, red the start of B  
1098 reward zone, and blue the start of A reward zone. (f) Distribution of the place field  
1099 centroid for A-selective and B-selective place cells across the track (25 spatial bins).

1100 Both categories of place cells are non-uniformly distributed across the track, with a  
1101 skew toward the common segment of the track (**place field distribution, A-selective:**  
1102 Rayleigh test of uniformity,  $Z = 4.72$ ,  $**P = 0.009$ ,  $n = 590$  neurons; **B-selective:**  
1103 Rayleigh test of uniformity,  $Z = 89.63$ ,  $***P < 0.001$ ,  $n = 468$  neurons). A-selective place  
1104 cells tend to be also distributed at toward more distant locations on the track toward the  
1105 A reward zone. (g) Distribution of place field centroids differs between A-selective and  
1106 B-selective place cells (**A vs. B place field centroid difference:** 2-sample Kolmogorov-  
1107 Smirnov test,  $D_{590, 468} = 0.22$ ,  $***P < 0.001$ ,  $n = 590$  vs. 468 neurons). (h) Pearson  
1108 correlation of spatial tuning curves between A and B laps for A-, B-, and trial non-  
1109 selective place cells. Spatial correlation scores are low for task selective neurons with no  
1110 difference between groups and significantly lower compared to task non-selective  
1111 neurons consistent with effective discrimination between each category of place cells  
1112 (**A-selective vs. A&B:**  $0.24 \pm 0.04$  vs.  $0.49 \pm 0.05$ , paired Wilcoxon signed-rank test,  
1113  $W_{10} = -66$ ,  $**P = 0.003$ ; **B-selective vs. A&B:**  $0.21 \pm 0.04$  vs.  $0.49 \pm 0.05$ , paired  
1114 Wilcoxon signed-rank test,  $W_{10} = -66$ ,  $**P = 0.003$ ). Central mark indicates median and  
1115 top and bottom boxes indicate 25<sup>th</sup> and 75<sup>th</sup> percentiles, respectively. Whiskers denote  
1116 the most extreme data points. Error bars indicate mean  $\pm$  s.e.m. Data shown from 11  
1117 FOV from  $n = 10$  mice.

1118 **Fig. 3: Place cells show distinct and task-oriented forms of remapping between**  
1119 **trial types.**

1120 (a) Overlap of the imaging field with the maximum intensity projection on A-laps (blue)  
1121 and B-laps (red). (b) Examples of the three types of remapping place cells observed in  
1122 CA1. (1) Example of a common neuron that fires in its place field regardless of trial type.  
1123 (2) Example of an activity remapping neuron whose calcium activity in its place field is  
1124 modulated by trial type. (3) Example of a global remapping neuron which has distinct  
1125 place fields on each trial type. (4) Examples of a partially remapping neuron with a  
1126 common field (trial insensitive) located  $\sim 1/3$  of the distance from the lap start and an A  
1127 trial specific field (partial field) located before it. Individual points on event spiral maps  
1128 represent significant running-related  $\text{Ca}^{2+}$  events on A (blue) or B (red) trials. Colormaps  
1129 on the right represent the mean  $\Delta F/F$  activity in each spatial bin on each of the pseudo-  
1130 randomly presented trial laps. Blue colormap represents A trials, while red colormap  
1131 represented B trials. Note the difference in the  $\Delta F/F$  signal of the activity remapping (2)  
1132 neuron between A and B laps. Example numbers correspond to the neurons circled in  
1133 (a). (c) Spatial tuning colormaps for each class of remapping place cells. Cells are  
1134 sorted according to the maximum spatial bin rate on A laps. Note the predominant shift  
1135 of global remapping neurons place fields toward earlier locations on the track on B laps.  
1136 Partial remapping neurons were sorted by their common place field. Bottom left panel  
1137 depicts the mean  $\Delta F/F$  value relative to the onset of the  $\text{Ca}^{2+}$  event in the place field for  
1138 activity remapping neurons. The activity map was sorted according to the difference  
1139 between the peak mean  $\Delta F/F$  value of  $\text{Ca}^{2+}$  transients in the place field on A vs. B trials  
1140 to emphasize the degree of rate remapping in contrast to the spatial tuning map above  
1141 in which place cells are sorted according to their maximum spatial bin rate on A laps.

1142 The unclassified category consists of spatially tuned neurons that had 2+ place field on  
1143 both trials. (d) Distribution of the classes of non-remapping (common), remapping, and  
1144 unclassified place cells. The difference in distribution was significant between the  
1145 common class and three classes of remapping neurons (**Difference among remapping**  
1146 **classes:** Friedman test,  $\chi_4^2 = 33.75$ ,  $***P < 0.001$ ; **Common vs. activity:**  $0.28 \pm 0.03$  vs.  
1147  $0.02 \pm 0$ , paired Wilcoxon signed-rank test,  $W_{10} = 66$ ,  $**P = 0.003$ ; **Common vs. global:**  
1148  $0.28 \pm 0.03$  vs.  $0.16 \pm 0.03$ , paired Wilcoxon signed-rank test,  $W_{10} = 48$ ,  $*P = 0.032$ ;  
1149 **Common vs. partial:**  $0.28 \pm 0.03$  vs.  $0.19 \pm 0.01$ , paired Wilcoxon signed-rank test,  $W_{10}$   
1150  $= 60$ ,  $**P = 0.01$ ). Error bars indicate mean  $\pm$  s.e.m. (e) Common place cells are  
1151 distributed across the track according to spatial task demand. The lowest density of  
1152 common fields was present in Zone I (prior to the B reward zone) where spatial  
1153 orientation/mapping is critical to task performance. The place field density progressively  
1154 increased from Zone I until zone III (**Place field distribution for common neurons:**  
1155 Rayleigh test of uniformity,  $Z = 13.82$ ,  $***P < 0.001$ ,  $n = 700$  neurons). (f) Global  
1156 remapping neurons exhibited task-oriented remapping of place fields. In particular,  
1157 place cells with place field centroids located in Zone II (between the reward zones) on A  
1158 laps exhibited a statistically significant shift of place fields on B trials to earlier positions  
1159 on the track (**Zone II A vs. B lap field shift:**  $0.3 \pm 0.03$ , 1-sample Wilcoxon signed-rank  
1160 test against 0,  $W_{10} = 66$ ,  $***P < 0.001$ ). (g) Analysis of inter-zone movement revealed  
1161 additional shifting of A place fields relative to B fields (**Global remapping neurons**  
1162 **place field zone shift:** Friedman test,  $\chi_8^2 = 47.87$ ,  $***P < 0.001$ ) There were, however,  
1163 no significant shifts between specific zones. Error bars indicates mean  $\pm$  s.e.m. (h)  
1164 Partial fields of partial remapping place cells exhibited remapping dynamics similar to  
1165 those observed for task-selective place cells (Figure 2f) with fields skewed toward zone  
1166 I of the track and additional fields in Zone II during A trials (**A vs. B partial remapping**  
1167 **neurons place field centroid difference:** 2-sample Kolmogorov-Smirnov test,  $D_{253, 253}$   
1168  $= 0.19$ ,  $***P < 0.001$ ,  $n = 253$  vs. 253 neurons). Arrows represent the respective reward  
1169 zones. Analysis from 11 FOV from  $n = 10$  mice.

#### 1170 **Fig. 4: Learning induces rapid remapping of place maps.**

1171 (a) (Top) Schematic illustrating the accelerated training regimen and imaging schedule  
1172 for odor-cued spatial navigation. (Bottom) Timeline for recall imaging experiments  
1173 following memory consolidation. (b) Learning performance during accelerated learning.  
1174 Mice achieve high behavior performance by the last day of training ( $92 \pm 2\%$ ,  $n = 6$   
1175 mice). Error bars indicate mean  $\pm$  s.e.m. (c) Example of matching spatial components  
1176 (ROIs) across two different sessions. Only components with high spatial component  
1177 overlaps were used in the analysis to avoid component mismatching. (d) (Top) Example  
1178 spatial tuning maps that show rapid remapping of spatial activity during learning in  
1179 contrast to memory recall following consolidation (Bottom). (e) Task-dependent tuning  
1180 of place cells occurs as early as the first day of training and persists during learning with  
1181 increase in fraction of A-trial tuned place cells during A, but not B trials (**Fraction of**  
1182 **tuned place cells, A trials, learning:** one-way RM mixed effects analysis, effect of  
1183 training day,  $F_{6, 22.24} = 7.24$ ,  $***P < 0.001$ ; **B trials:** one-way RM mixed effects analysis,

1184 effect of training day,  $F_{6, 27} = 1.36$ ,  $P = 0.265$ ,  $n = 6$  mice) with no change during recall  
1185 (**A trials, recall**: one-way RM mixed effects analysis, effect of training day,  $F_{6, 28} = 0.32$ ,  
1186  $P = 0.923$ ; **B trials**: one-way RM mixed effects analysis, effect of training day,  $F_{6, 28} =$   
1187  $0.26$ ,  $P = 0.951$ ,  $n = 5$  mice) (f) (left) Population vector (PV) correlation of all matching  
1188 cells relative to Day 1 of imaging shows rapid restructuring of run-related activity on the  
1189 following training day that stabilizes on recall trials (**PV correlation, A trials**: two-way  
1190 RM mixed effects analysis, effect of time,  $F_{3, 22.35} = 50.93$ ,  $***P < 0.001$ , effect of  
1191 behavior,  $F_{1, 9.04} = 9.02$ ,  $*P = 0.015$ , interaction between time and behavior,  $F_{3, 22.35} =$   
1192  $0.78$ ,  $P = 0.519$ ; **B trials**: two-way RM mixed effects analysis, effect of time,  $F_{3, 22.44} =$   
1193  $43.88$ ,  $***P < 0.001$ , effect of behavior,  $F_{1, 9.07} = 9.13$ ,  $*P = 0.014$ , interaction between  
1194 time and behavior,  $F_{3, 22.44} = 1.78$ ,  $P = 0.18$ ,  $n = 6$  learn, 5 recall mice; **Day 2 vs. 7,**  
1195 **recall, A trials**:  $0.58 \pm 0.05$  vs.  $0.39 \pm 0.06$ , paired  $t$ -test,  $t_4 = 7.89$ ,  $**P = 0.003$ ; **B trials**:  
1196  $0.57 \pm 0.05$  vs.  $0.38 \pm 0.05$ , paired  $t$ -test,  $t_4 = 7.79$ ,  $**P = 0.002$ ,  $n = 5$  mice), but not  
1197 during learning (**Day 2 vs. 7, learning, A trials**:  $0.43 \pm 0.03$  vs.  $0.19 \pm 0.01$ , paired  $t$ -  
1198 test,  $t_2 = 5.89$ ,  $*P = 0.028$ ; **B trials**:  $0.41 \pm 0.04$  vs.  $0.19 \pm 0.01$ , paired  $t$ -test,  $t_2 = 5.06$ ,  $P$   
1199  $= 0.053$ ,  $n = 3$  mice; **Day 7, learning vs. recall, A trials**:  $0.21 \pm 0.02$  vs.  $0.39 \pm 0.06$ ,  
1200 unpaired  $t$ -test,  $t_7 = -2.78$ ,  $*P = 0.027$ ; **B trials**:  $0.19 \pm 0.01$  vs.  $0.38 \pm 0.05$ , unpaired  $t$ -  
1201 test,  $t_7 = -3.37$ ,  $*P = 0.014$ ,  $n = 4$  learn, 5 recall mice). A similar trend was observed for  
1202 the **tuning curve** correlation scores between matching place cells selected using the  
1203 tuning specificity criterion (**TC correlation, A trials**: two-way RM mixed effects analysis,  
1204 effect of time,  $F_{3, 22.37} = 27.73$ ,  $***P < 0.001$ , effect of behavior,  $F_{1, 8.85} = 8.69$ ,  $*P =$   
1205  $0.017$ , interaction between time and behavior,  $F_{3, 22.37} = 3.95$ ,  $*P = 0.021$ ; **B trials**: two-  
1206 way RM mixed effects analysis, effect of time,  $F_{3, 22.46} = 32.87$ ,  $***P < 0.001$ , effect of  
1207 behavior,  $F_{1, 8.81} = 11.81$ ,  $**P = 0.008$ , interaction between time and behavior,  $F_{3, 22.46} =$   
1208  $1.73$ ,  $P = 0.189$ ,  $n = 6$  learn, 5 recall mice; **Day 2 vs. 7, learning, A trials**:  $0.51 \pm 0.03$   
1209 vs.  $0.22 \pm 0.02$ , paired  $t$ -test,  $t_2 = 5.84$ ,  $*P = 0.028$ ; **B trials**:  $0.51 \pm 0.03$  vs.  $0.19 \pm 0.04$ ,  
1210 paired  $t$ -test,  $t_2 = 6.49$ ,  $*P = 0.045$ ,  $n = 3$  mice; **Day 2 vs. 7 recall, A trials**:  $0.65 \pm 0.06$   
1211 vs.  $0.5 \pm 0.06$ , paired  $t$ -test,  $t_4 = 5.1$ ,  $*P = 0.014$ ; **B trials**:  $0.68 \pm 0.03$  vs.  $0.45 \pm 0.05$ ,  
1212 paired  $t$ -test,  $t_4 = 5.32$ ,  $**P = 0.006$ ,  $n = 5$  mice; **Day 7, learning vs. recall, A trials**:  
1213  $0.23 \pm 0.02$  vs.  $0.5 \pm 0.06$ , unpaired  $t$ -test,  $t_7 = -4.05$ ,  $**P = 0.009$ ; **B trials**:  $0.19 \pm 0.03$   
1214 vs.  $0.45 \pm 0.05$ , unpaired  $t$ -test,  $t_7 = -4.03$ ,  $**P = 0.01$ ,  $n = 4$  learn, 5 recall mice). (g)  
1215 Learning stabilizes neighboring session maps at the population level and between place  
1216 cells. As learning progresses through each training stage, the population correlation  
1217 scores approach those observed for the memory-consolidated recall cohort  
1218 (**Neighboring session PV correlation, A trials**: two-way RM mixed effects analysis,  
1219 effect of time,  $F_{2, 14.28} = 3.98$ ,  $*P = 0.042$ , effect of behavior,  $F_{1, 9.24} = 5.45$ ,  $*P = 0.044$ ,  
1220 interaction between time and behavior,  $F_{2, 14.28} = 7.37$ ,  $**P = 0.006$ ; **B trials**: two-way  
1221 RM mixed effects analysis, effect of time,  $F_{2, 14.17} = 0.98$ ,  $P = 0.4$ , effect of behavior,  $F_{1,$   
1222  $9.06} = 1.88$ ,  $P = 0.204$ , interaction between time and behavior,  $F_{2, 14.17} = 6.18$ ,  $*P = 0.012$ ,  
1223  $n = 6$  learn, 5 recall mice; **Days 1 vs. 2 Vs. Day 6 vs. 7, learning, A trials**:  $0.43 \pm 0.03$   
1224 vs.  $0.54 \pm 0.01$ , paired  $t$ -test,  $t_2 = -5.24$ ,  $*P = 0.034$ ; **B trials**:  $0.41 \pm 0.04$  vs.  $0.52 \pm 0.01$ ,  
1225 paired  $t$ -test,  $t_2 = -2.42$ ,  $P = 0.136$ ,  $n = 3$  mice; **Days 1 vs. 2 Vs. Day 6 vs. 7, recall, A**  
1226 **trials**:  $0.58 \pm 0.05$  vs.  $0.56 \pm 0.03$ , paired  $t$ -test,  $t_4 = 0.55$ ,  $P = 0.611$ ; **B trials**:  $0.57 \pm$

1227 0.05 vs.  $0.52 \pm 0.04$ , paired *t*-test,  $t_4 = 1.54$ ,  $P = 0.198$ ,  $n = 5$  mice). For spatially tuned  
1228 neurons, we the stabilization occurred during learning on both A and B trials, but not  
1229 during recall (**Neighboring session TC correlation, A trials**: two-way RM mixed  
1230 effects analysis, effect of time,  $F_{2, 14.38} = 0.74$ ,  $P = 0.492$ , effect of behavior,  $F_{1, 9.14} =$   
1231  $2.32$ ,  $P = 0.161$ , **interaction between time and behavior**,  $F_{2, 14.38} = 6.01$ ,  $*P = 0.013$ ; **B**  
1232 **trials**: two-way RM mixed effects analysis, effect of time,  $F_{2, 13.98} = 0.55$ ,  $P = 0.586$ ,  
1233 effect of behavior,  $F_{1, 8.83} = 4.49$ ,  $P = 0.064$ , **interaction between time and behavior**,  
1234  $F_{2, 13.98} = 9.32$ ,  $**P = 0.003$ ,  $n = 6$  learn, 5 recall mice; **Days 1 vs. 2 Vs. Day 6 vs. 7,**  
1235 **learning, A trials**:  $0.51 \pm 0.03$  vs.  $0.61 \pm 0.03$ , paired *t*-test,  $t_2 = -5.89$ ,  $*P = 0.028$ ; **B**  
1236 **trials**:  $0.51 \pm 0.03$  vs.  $0.6 \pm 0.01$ , paired *t*-test,  $t_2 = -5.09$ ,  $*P = 0.036$ ,  $n = 3$  mice; **Days 1**  
1237 **vs. 2 Vs. Day 6 vs. 7, recall, A trials**:  $0.65 \pm 0.06$  vs.  $0.61 \pm 0.04$ . paired *t*-test,  $t_4 =$   
1238  $0.81$ ,  $P = 0.465$ ; **B trials**:  $0.68 \pm 0.03$  vs.  $0.61 \pm 0.04$ , paired *t*-test,  $t_4 = 1.71$ ,  $P = 0.162$ ,  
1239  $n = 5$  mice). (h) Place fields are remapped over greater distances during learning on A  
1240 and B trials (**Mean centroid difference relative to Day 1, A trials**: two-way RM mixed  
1241 effects analysis, effect of time,  $F_{3, 22.19} = 30.7$ ,  $***P < 0.001$ , effect of behavior,  $F_{1, 8.62} =$   
1242  $3.52$ ,  $P = 0.095$ , interaction between time and behavior,  $F_{3, 22.19} = 2.78$ ,  $P = 0.065$ ,  $n = 6$   
1243 learn, 5 recall mice; **B trials**: two-way RM mixed effects analysis, effect of time,  $F_{3, 23.34}$   
1244  $= 25.56$ ,  $***P < 0.001$ , effect of behavior,  $F_{1, 8.98} = 11.81$ ,  $**P = 0.007$ , interaction  
1245 between time and behavior,  $F_{3, 23.34} = 0.14$ ,  $P = 0.936$ ,  $n = 6$  learn, 5 recall mice;  
1246 **Learning vs. recall, Day 5, A trials**:  $32.16 \pm 1.89$  cm vs.  $22.83 \pm 2.64$  cm, unpaired *t*-  
1247 test,  $t_8 = 2.88$ ,  $*P = 0.041$ ; **B trials**:  $31.45 \pm 2.6$  cm vs.  $22.51 \pm 2.01$  cm, unpaired *t*-test,  
1248  $t_8 = 2.72$ ,  $P = 0.052$ ,  $n = 5$  learn, 5 recall mice).

1249 **Fig. 5: Dissimilarity between task spatial maps predicts animal performance.**

1250 (a) Example neuron during learning. As the performance of the animal increases during  
1251 training sessions (green), the task non-selective neuron ‘splits’ its common place field  
1252 into two task-dependent fields. (b) During recall, the spatial fields of this neurons are  
1253 stable. (c-d) Overlay of plots of normalized tuning curve correlation scores (left axis) and  
1254 animal performance (right axis) of matched A&B spatially tuned neurons during learning  
1255 (c) and recall (d). Normalized tuning curve correlation scores were calculated as the A  
1256 lap vs. B lap tuning correlation score on the relative session day divided by the A vs B  
1257 lap correlation score on the first day of imaging for each matched neuron. As the  
1258 performance of animals increased during learning, place cell maps between task trials  
1259 became progressively more decorrelated (**Normalized A vs. B lap correlation scores,**  
1260 **learning**: Kruskal-Wallis test,  $H_5 = 63.31$ ,  $***P < 0.001$ ,  $n = 1050$  neurons from 6 mice;  
1261 **Day 2**:  $0.94 \pm 0.07$ , 1-sample Wilcoxon signed-rank test against 1,  $W_{178} = -3536$ ,  $*P =$   
1262  $0.011$ ,  $n = 179$  neurons; **Day 7**:  $0.59 \pm 0.13$ , 1-sample Wilcoxon signed-rank test against  
1263 1,  $W_{121} = -4197$ ,  $***P < 0.001$ ,  $n = 122$  neurons). A similar effect was not observed  
1264 during recall when animals performed >90% accuracy on each day and the normalized  
1265 correlation scores were near the expected value of 1 (dashed gray line; **Normalized A**  
1266 **vs. B lap correlation scores, recall**: Kruskal-Wallis test,  $H_5 = 7.15$ ,  $P = 0.21$ ,  $n = 577$   
1267 neurons from 5 mice; **Day 2**:  $0.99 \pm 0.05$ , 1-sample Wilcoxon signed-rank test against 1,  
1268  $W_{132} = -5$ ,  $P = 0.996$ ,  $n = 133$  neurons; **Day 7**:  $0.95 \pm 0.07$ , 1-sample Wilcoxon signed-

1269 rank test against 1,  $W_{71} = -638$ ,  $P = 0.073$ ,  $n = 72$  neurons). (e-f) Scatterplots of the A  
1270 vs. B lap correlation against the performance from all sessions and animals during  
1271 learning (e) and recall (f). A linear regression fit revealed a strong inverse relationship  
1272 between the A-B correlation maps and performance for the learning cohort, but not for  
1273 the recall cohort (**Learning**: linear fit,  $R = -0.69$ ,  $***P = 2.17e-07$ ,  $n = 44$  sessions from 6  
1274 mice; **Recall**: linear fit,  $R = -0.32$ ,  $P = 0.058$ ,  $n = 35$  sessions from 5 mice). Error bars  
1275 indicate **95%  $\pm$ C.I. around median** for normalized correlations scores and mean  $\pm$   
1276 s.e.m. for performance fraction.

1277 **Fig. 6: Place maps incorporate information about trial type during task learning**  
1278 **and accurately predict both location and trial during recall**

1279  
1280 (a) A population vector decoder accurately predicts the position of an animal on the  
1281 track during both the initial training session (top) and late training session (bottom).  
1282 Plotted are the decoded positions (red) against the actual track position (blue) of the  
1283 mouse as a function of time. On the late training session, the decoder for this animal  
1284 additionally predicts the trial the animal is on with high accuracy. Throughout the figure,  
1285 positions 0-200 are represented twice, once each for A and B trials. Data from this  
1286 mouse only are used in panels b-d. (b) Confusion matrices quantifying decoding  
1287 accuracy demonstrate improved accuracy in identifying trial type associated with  
1288 improved performance. Each black point represents the actual position and trial of the  
1289 animal plotted against the decoder's prediction. Each matrix cell represents the number  
1290 of decoded points falling into each quadrant divided by the total data points in each trial  
1291 type. (c) Average trial decoding score (proportion of data points correctly classified) as a  
1292 function of position in early sessions (top) and late sessions (bottom). The majority of  
1293 misclassifications occurred early in training in the middle and late stages of the track on  
1294 A trials. (d) The median position decoding error across the track on both trials did not  
1295 substantially change across learning. (e) Example plot showing that as the performance  
1296 of a single mouse (ID: 4) increases with subsequent training sessions, the accuracy of  
1297 the population decoder also increases. (f) Same data as in (e) with performance plotted  
1298 against decoding score, revealing a strong positive relationship between task  
1299 performance and decoder score (**Correlation score significance**: two-sided one-  
1300 sample t-test,  $t_7 = 4.948$   $**P = 0.002$ ,  $n = 9$  sessions from mouse 4). (g) Cumulative  
1301 analysis across all training sessions revealed a strong positive relationship between  
1302 performance and decoding accuracy (**Correlation between performance and**  
1303 **decoding score in learning cohort**: two-way ANOVA,  $R = 0.68$ , effect of mouse  $F_{5,31} =$   
1304  $0.338$ ,  $P = 0.338$ , effect of performance,  $F_{1,31} = 29.014$ ,  $***P < 0.001$ , effect of  
1305 interaction,  $F_{5,31} = 0.806$ ,  $P = 0.554$ ,  $n = 43$  session from 6 mice). Each point denotes a  
1306 single training session and each type of mark a different animal. (h) In contrast, no  
1307 relationship was observed between position decoding error and task performance  
1308 (**Correlation between performance and decoding score in recall cohort**: two-way  
1309 ANOVA,  $R = -0.05$ , effect of mouse,  $F_{5,31} = 3.057$ ,  $*P = 0.023$ , effect of performance  
1310  $F_{1,31} = 2.026$ ,  $P = 0.164$ , effect of interaction,  $F_{5,31} = 1.569$ ,  $P = 0.197$ ,  $n = 43$  session  
1311 from 5 mice). (i) Colormap showing the improvement in the position-trial decoding  
1312 accuracy as function of training session. Each row denotes the median decoding score  
1313 across all 6 animals. The decoding score increases progressively forward along the



1314 track during each training session, prominently observed on A trials. Bottom graph plots  
1315 decoding score for sessions 1 and 6, as well as the median across all sessions. (j) An  
1316 equivalent plot of the decoding position error averaged across all animals does not  
1317 reveal such change during training.

# Figure 1

**a**

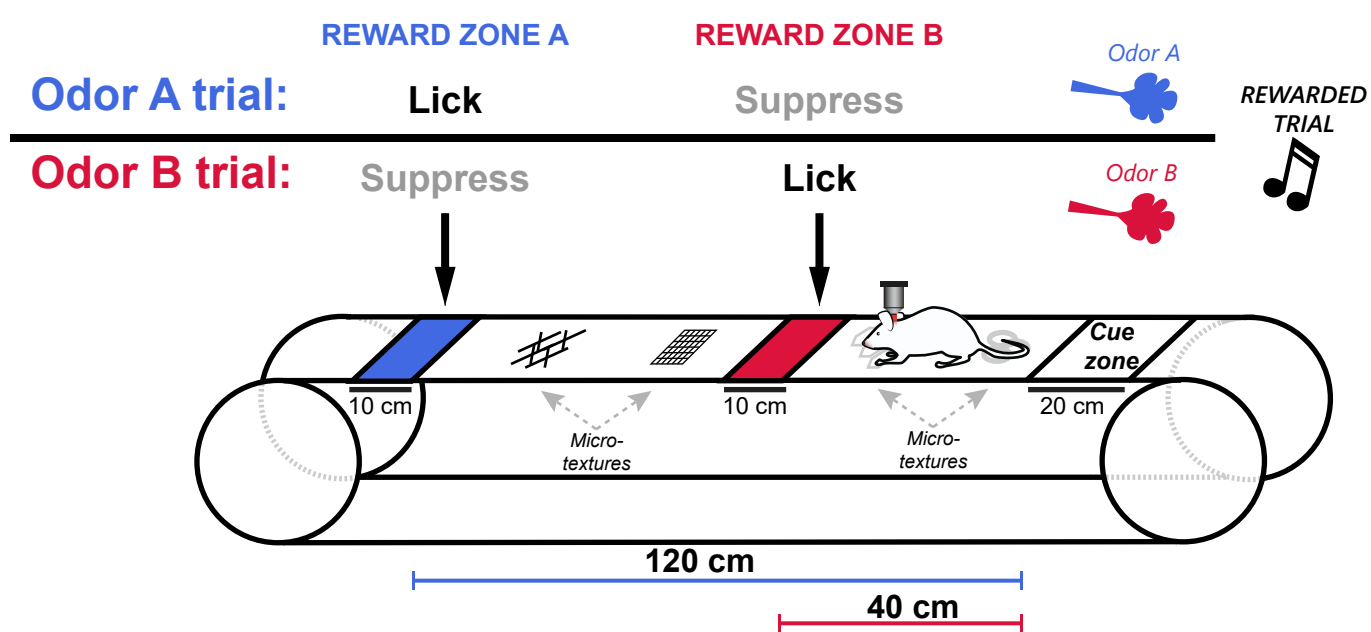

**b**

bioRxiv preprint doi: <https://doi.org/10.1101/2021.07.08.451493>; this version posted July 10, 2021. The copyright holder for this preprint (which was not certified by peer review) is the author/funder, who has granted bioRxiv a license to display the preprint in perpetuity. It is made available under aCC-BY 4.0 International license.

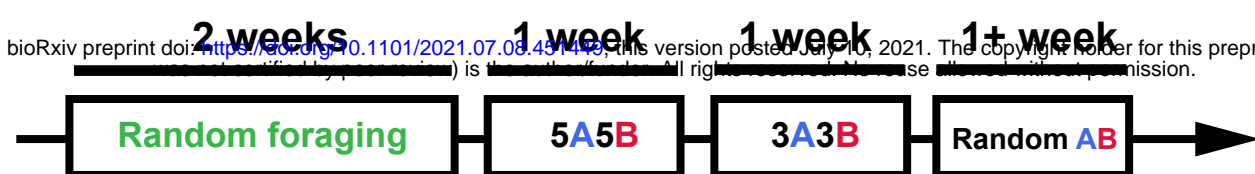

**d**

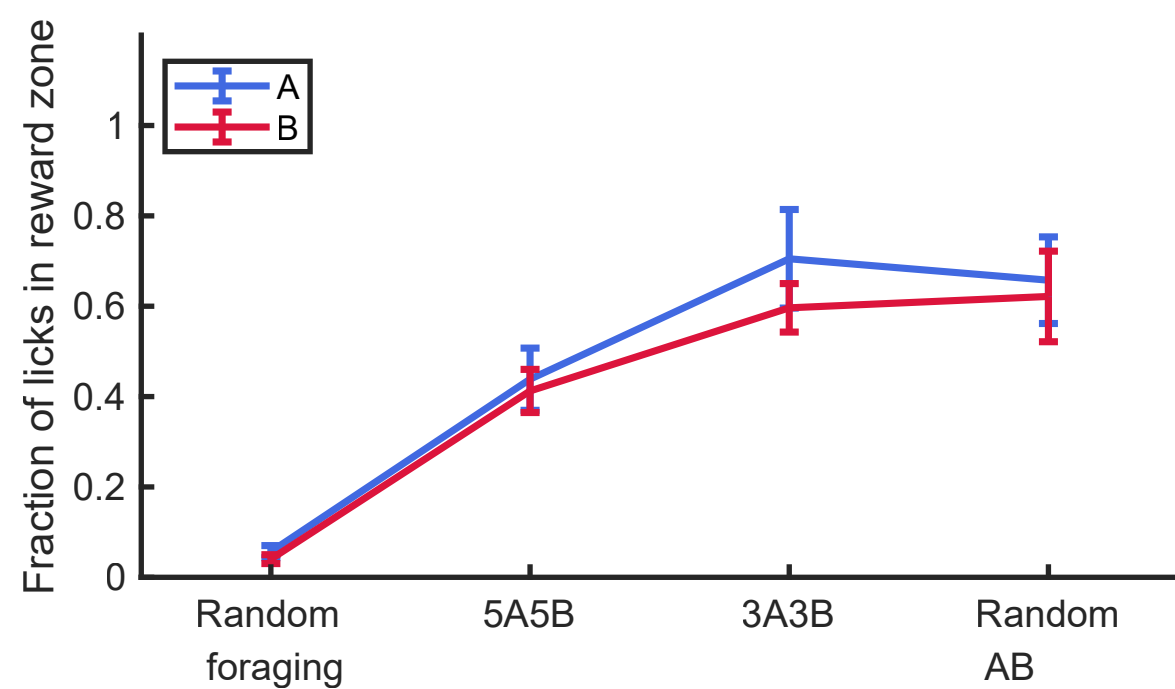

**e**

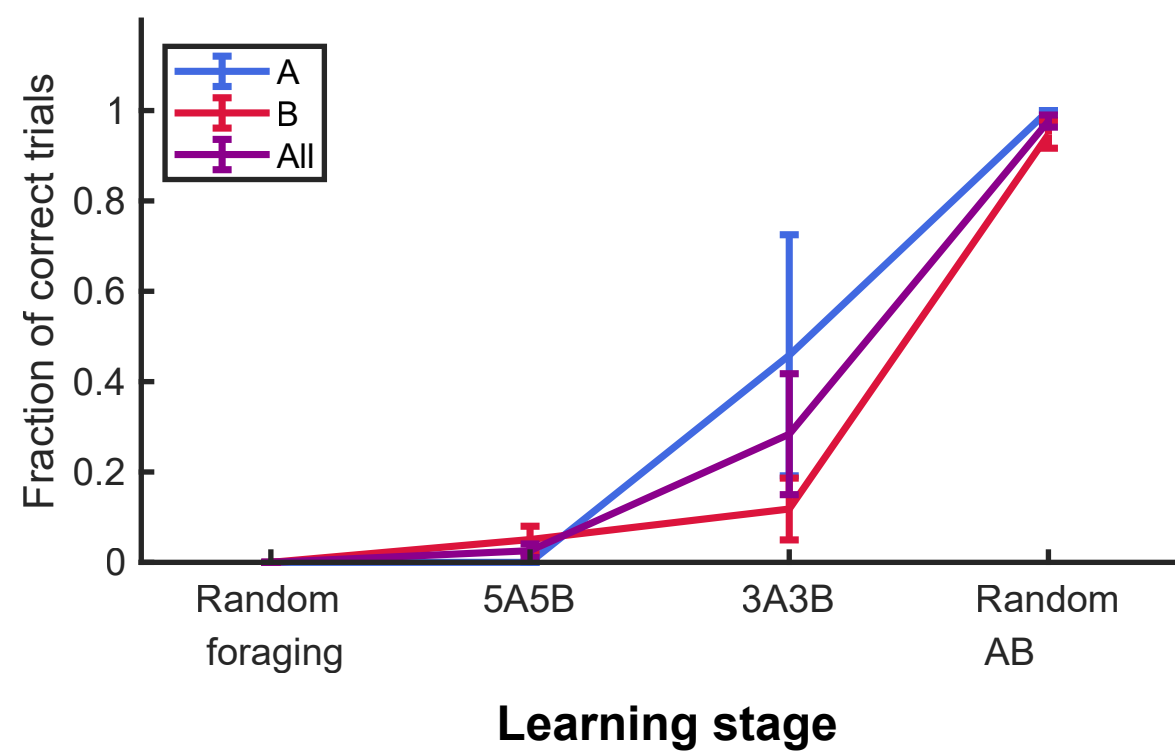

**c**

Random foraging

5A5B

3A3B

Random AB

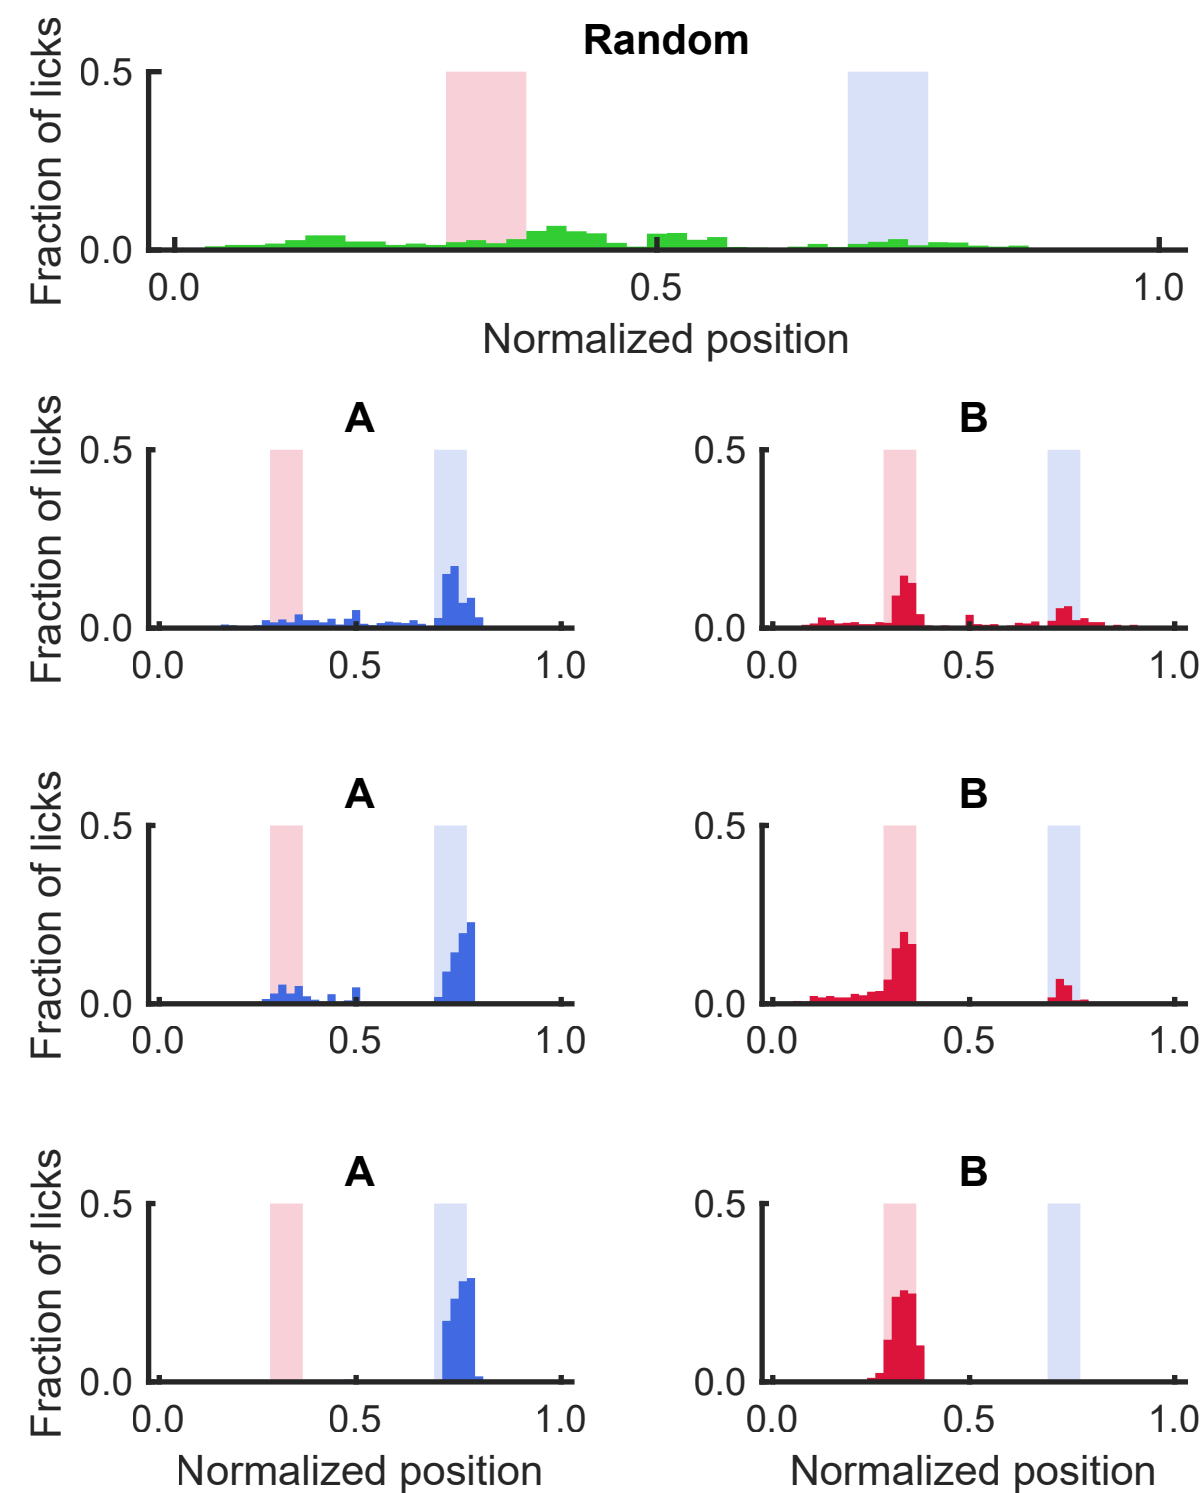

**f**

Random foraging

5A5B

3A3B

Random AB

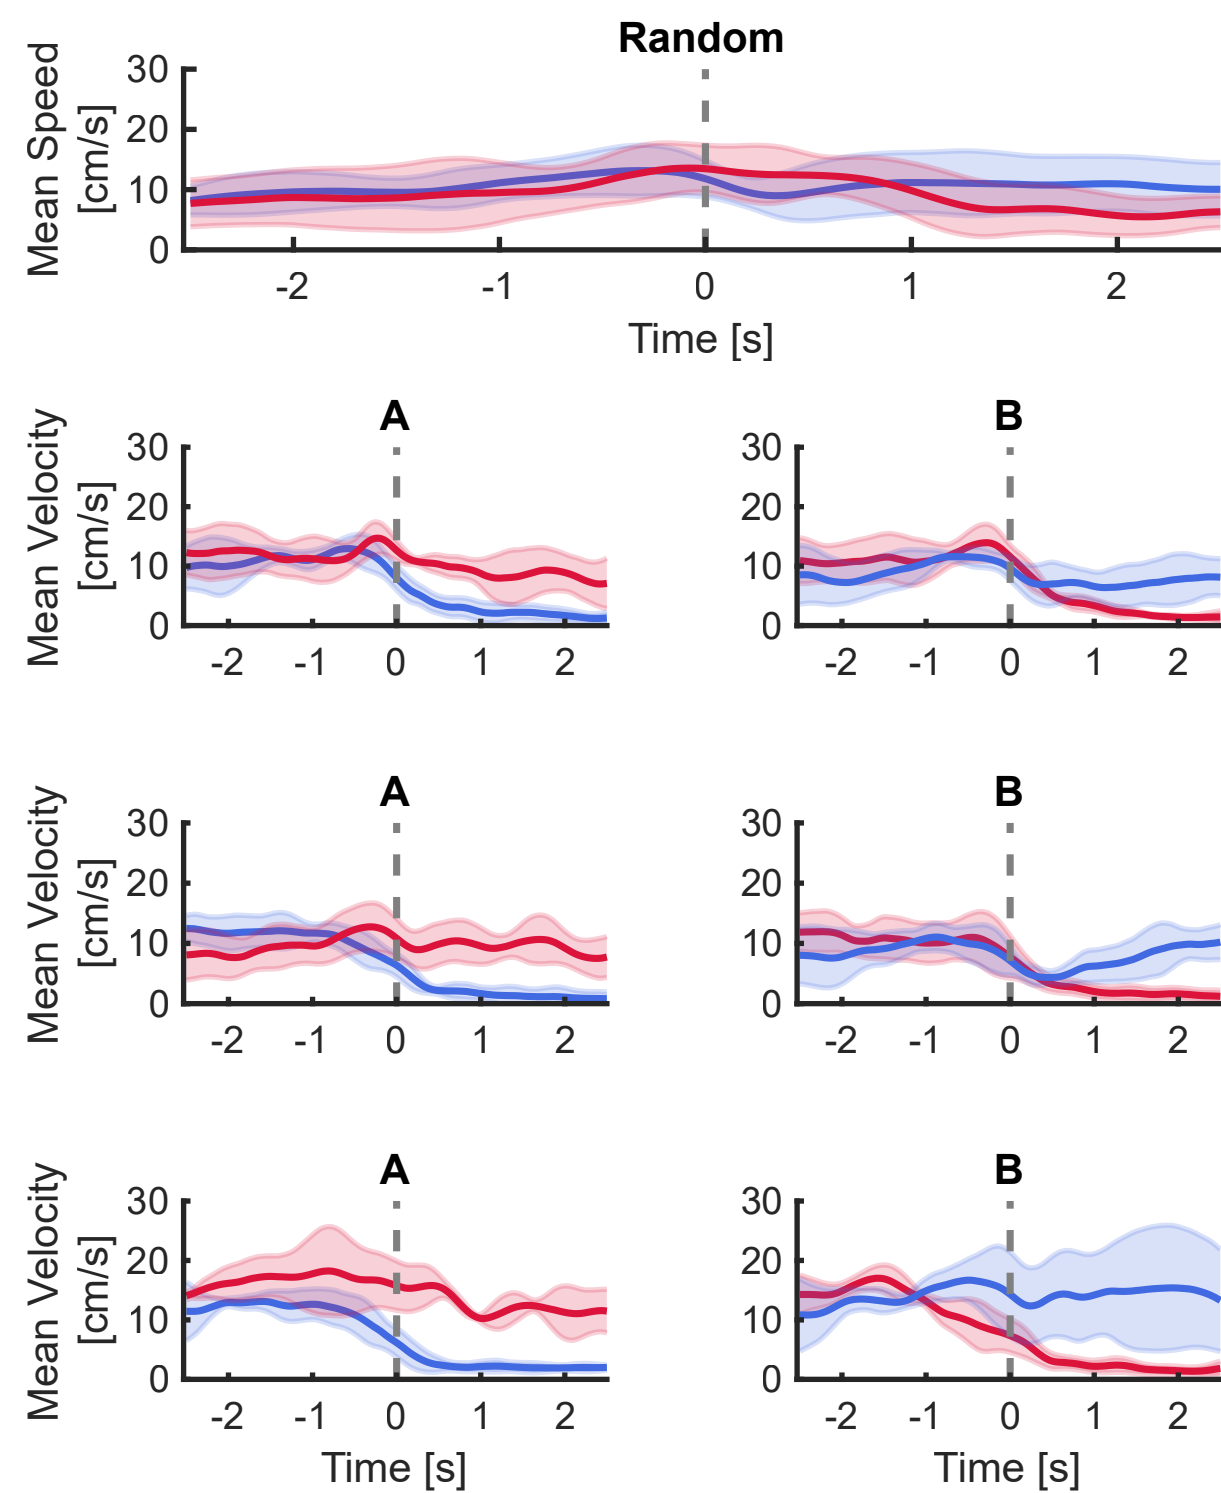

# Figure 2

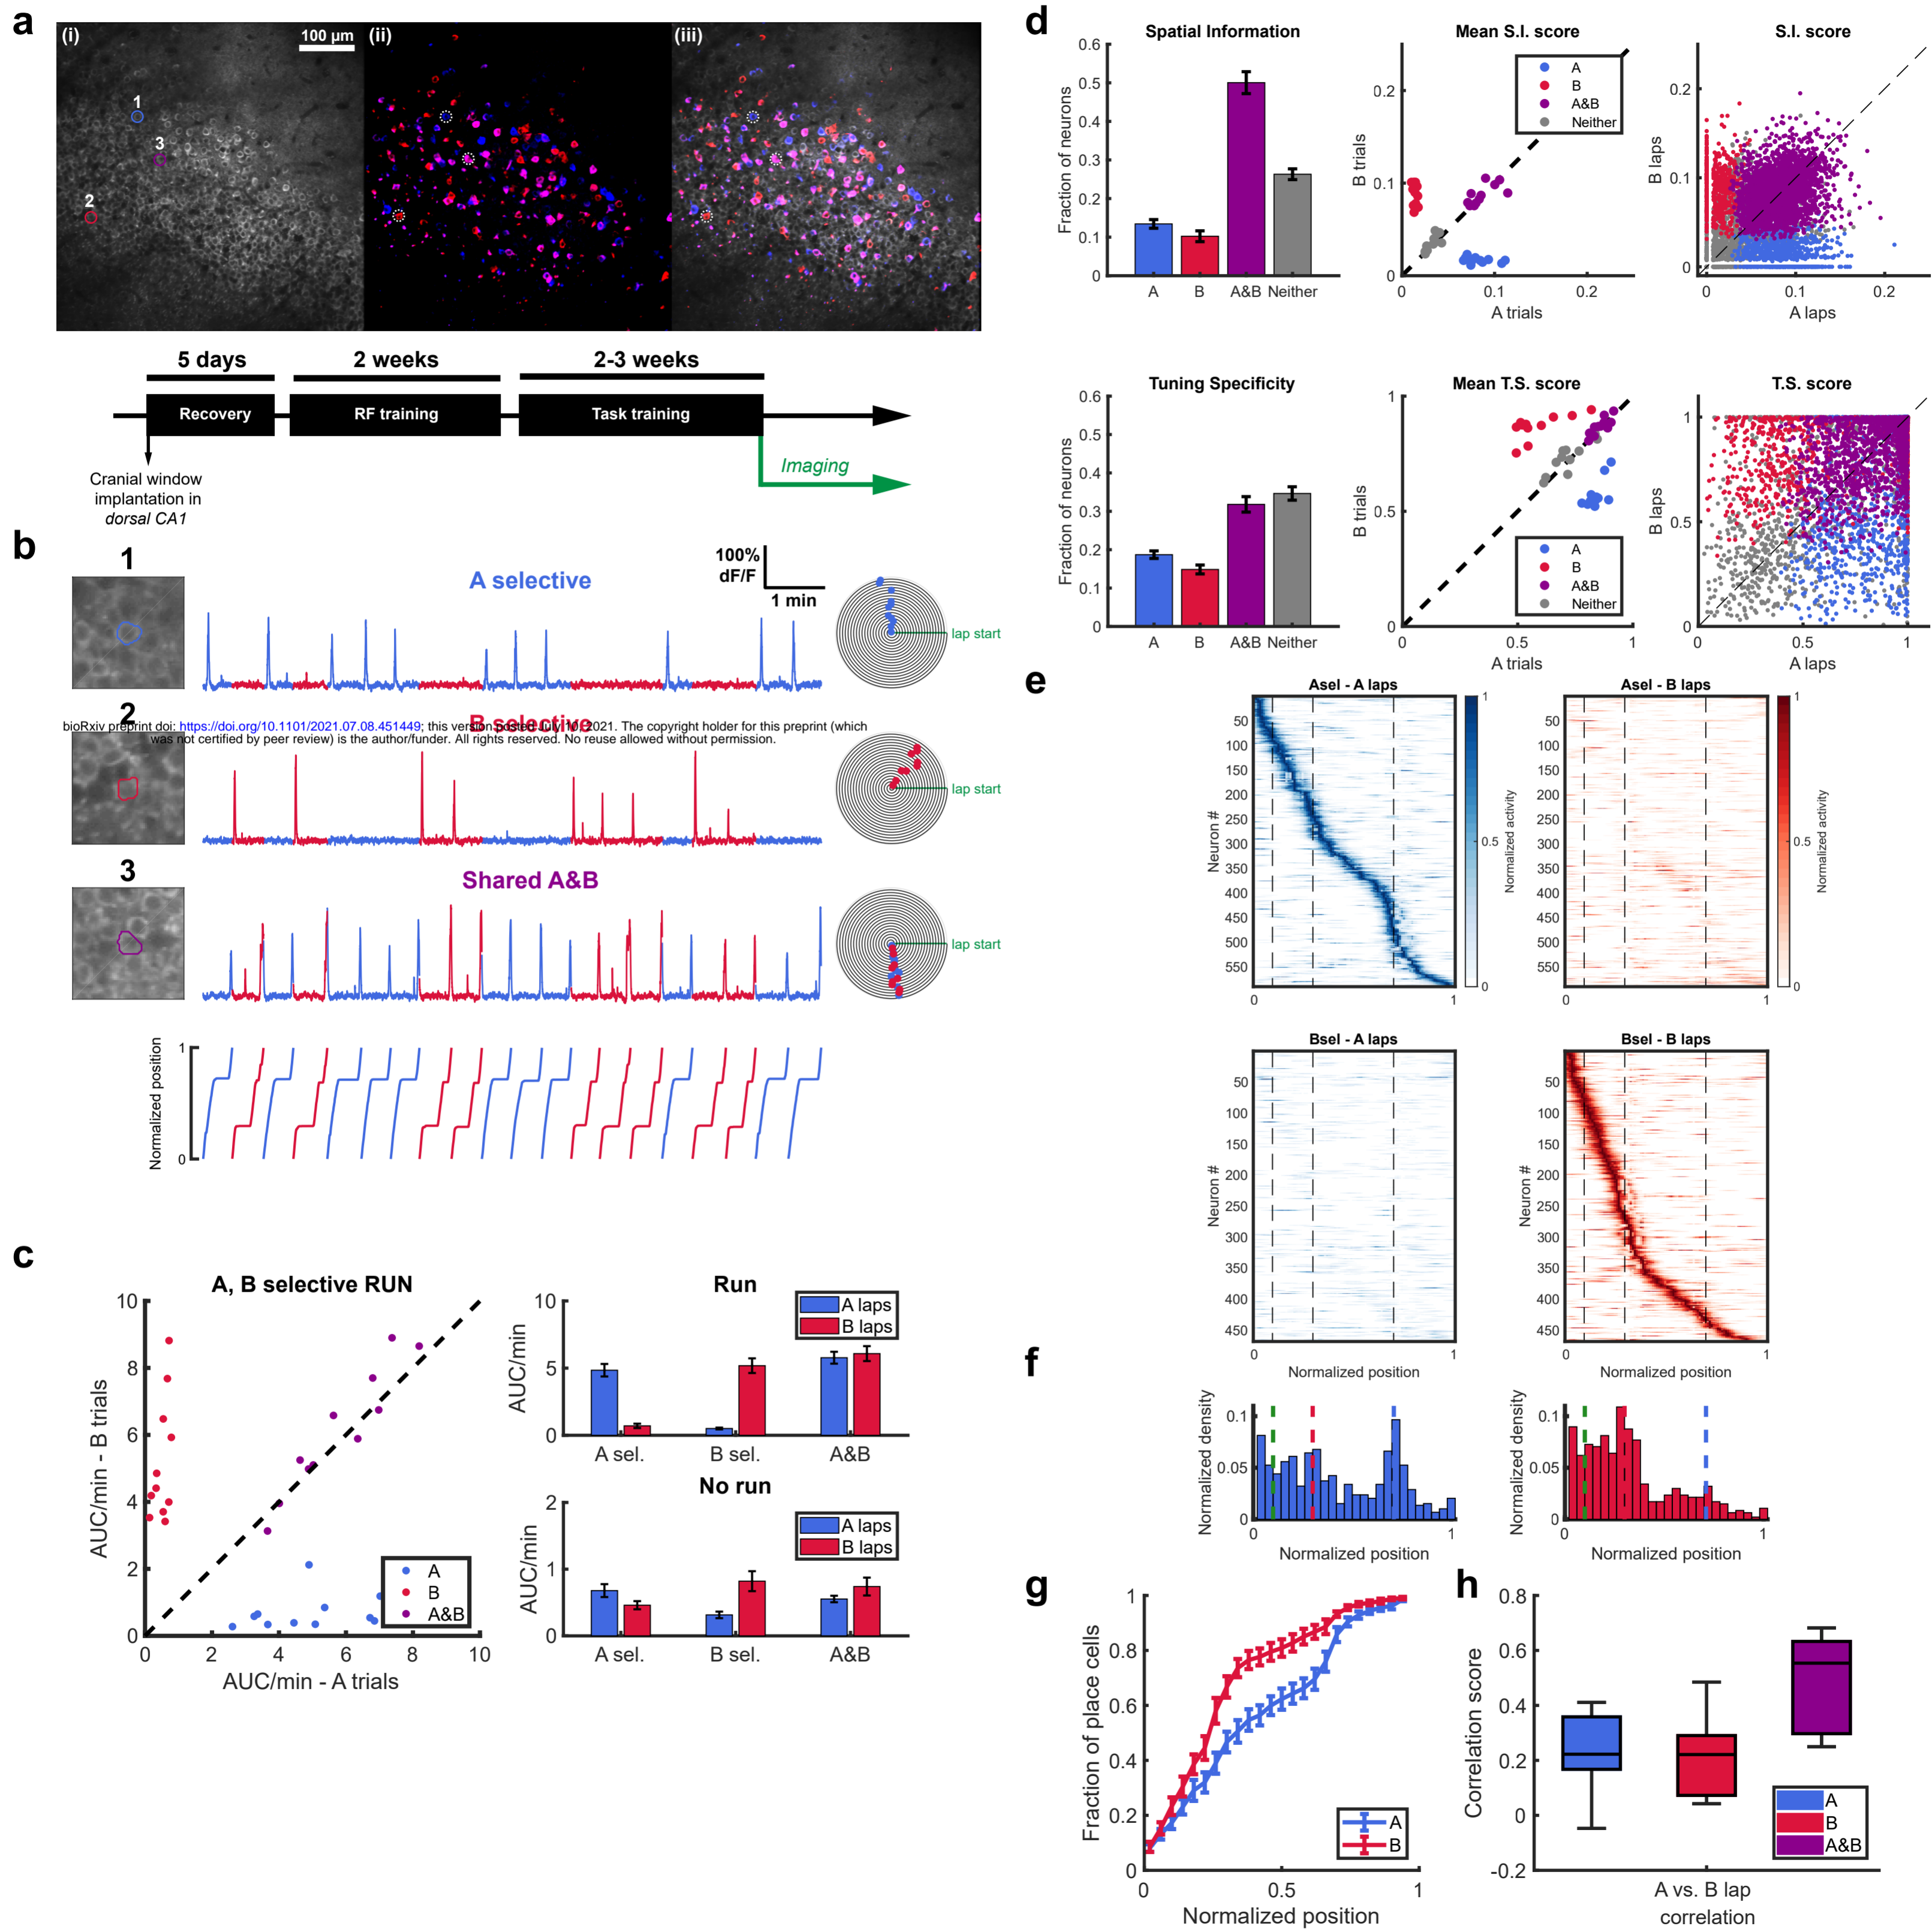

**Figure 3**

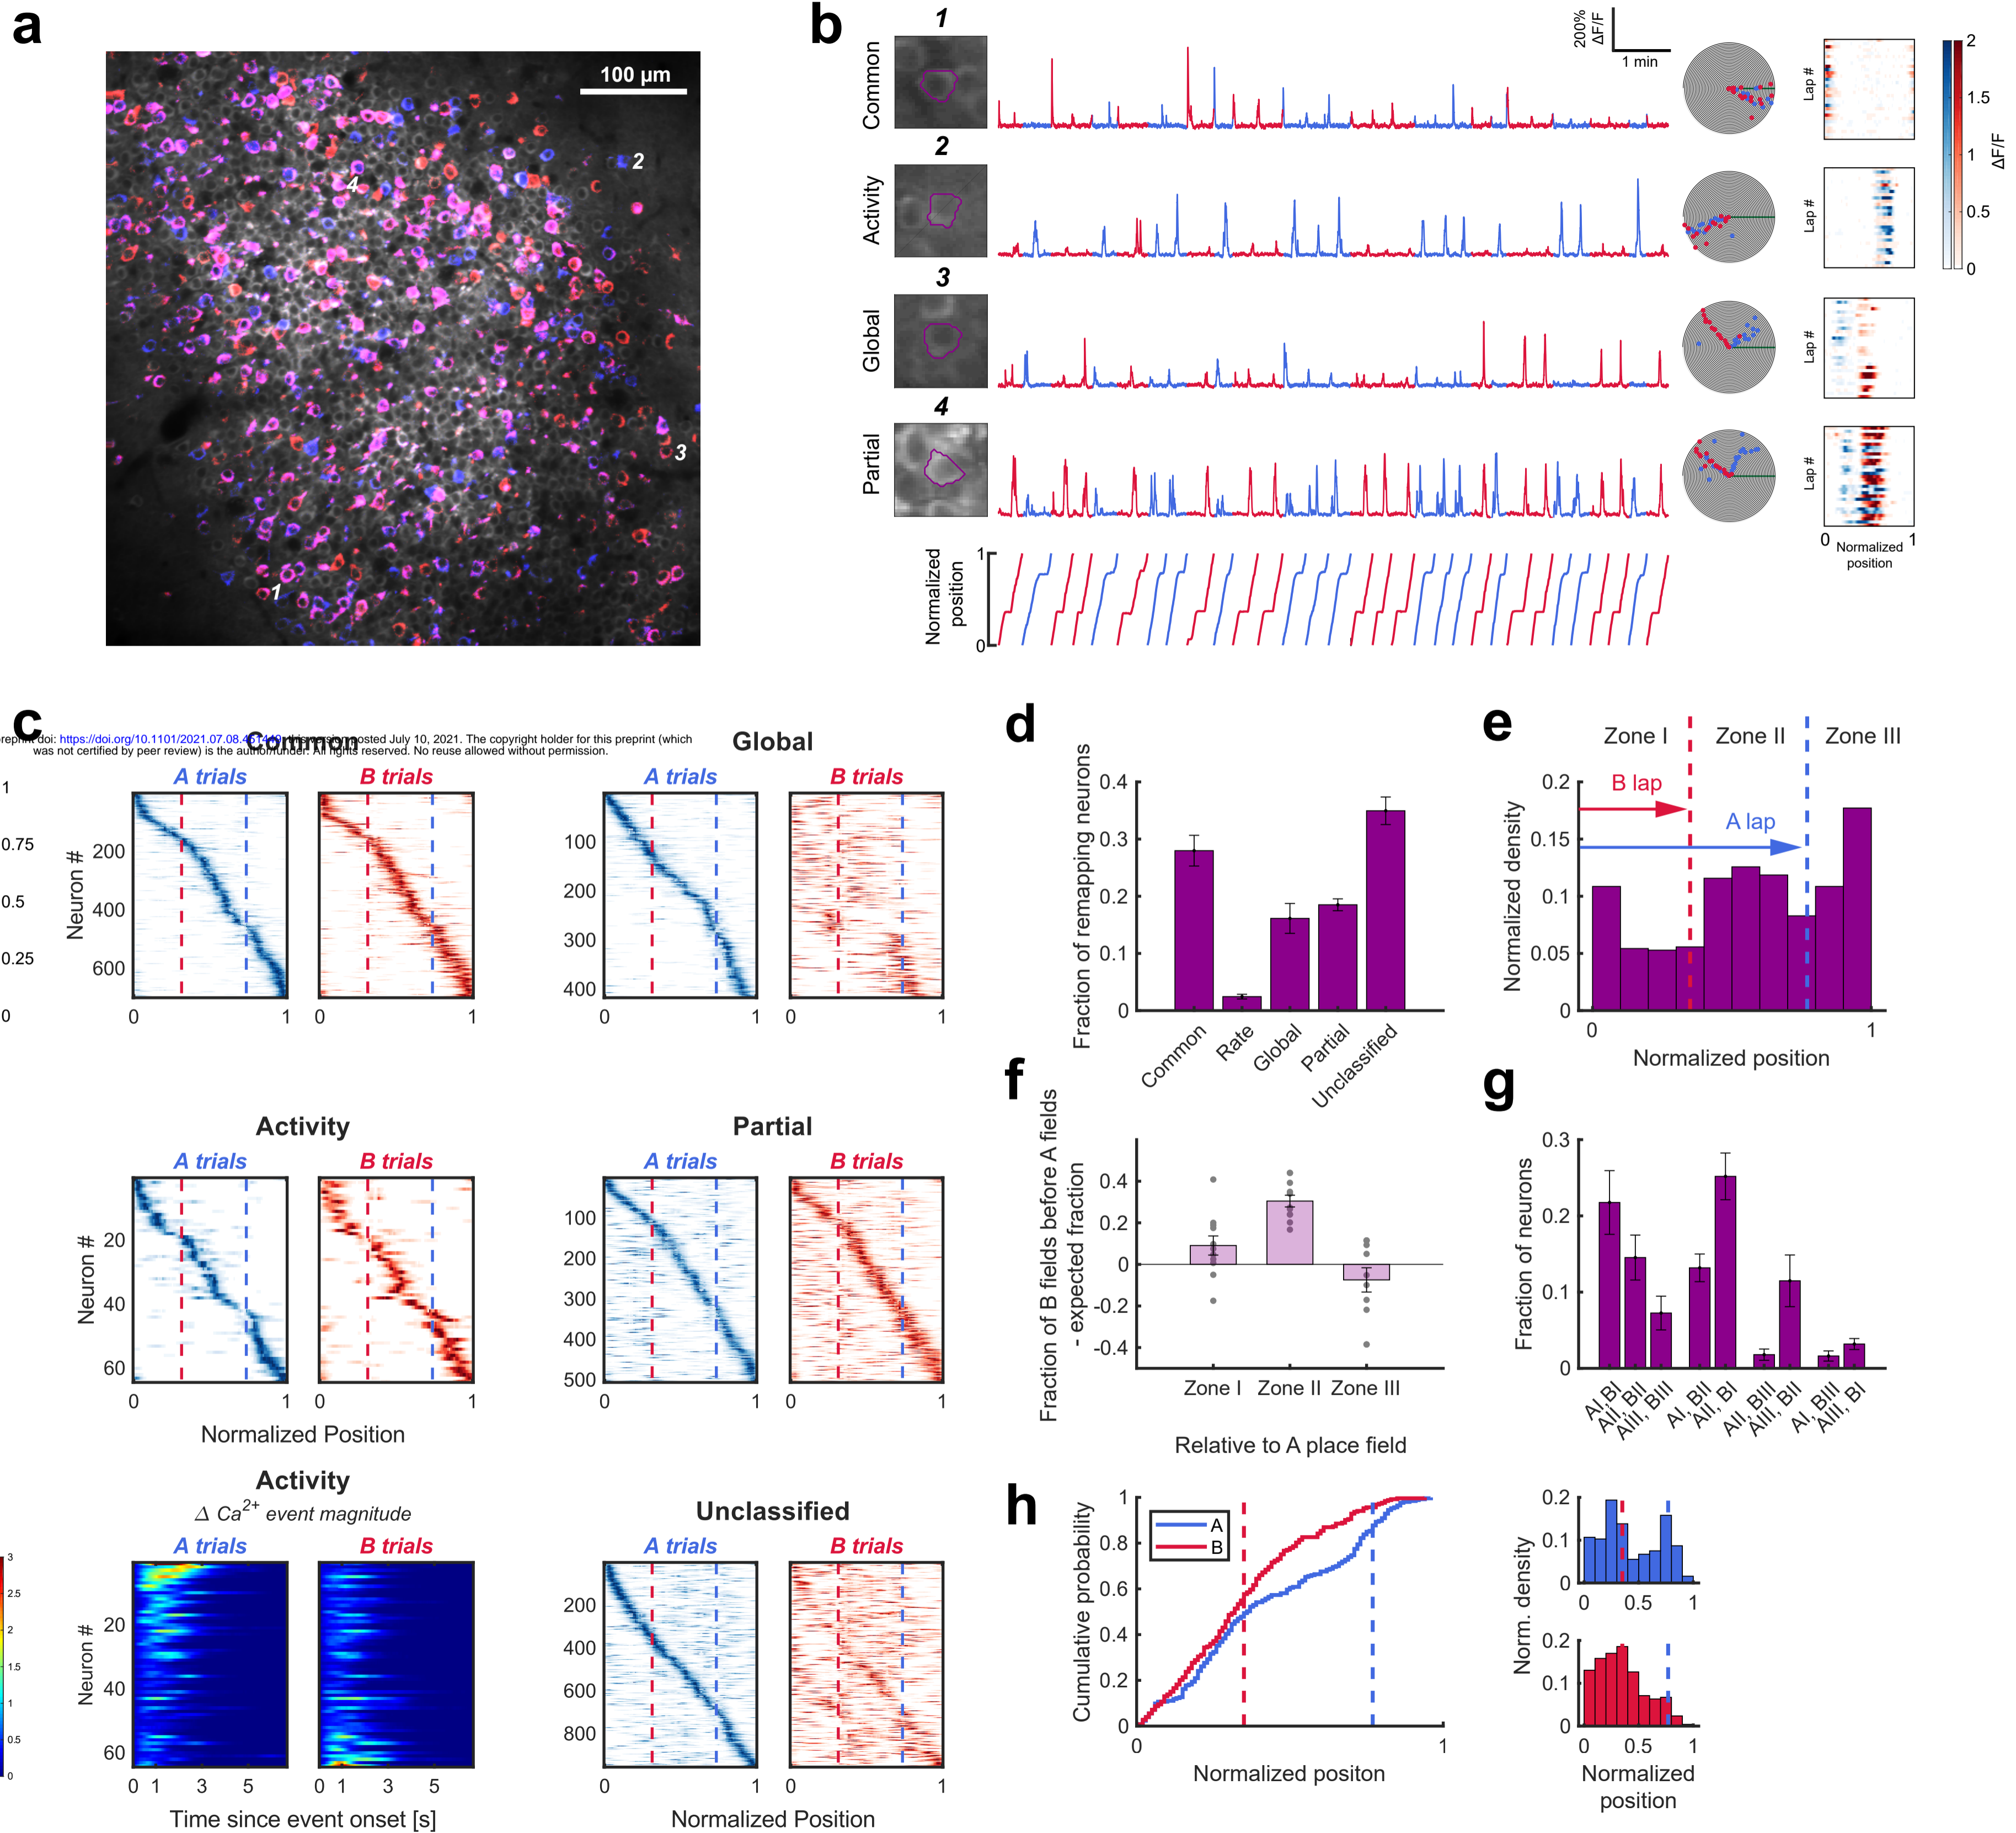

**Figure 4**

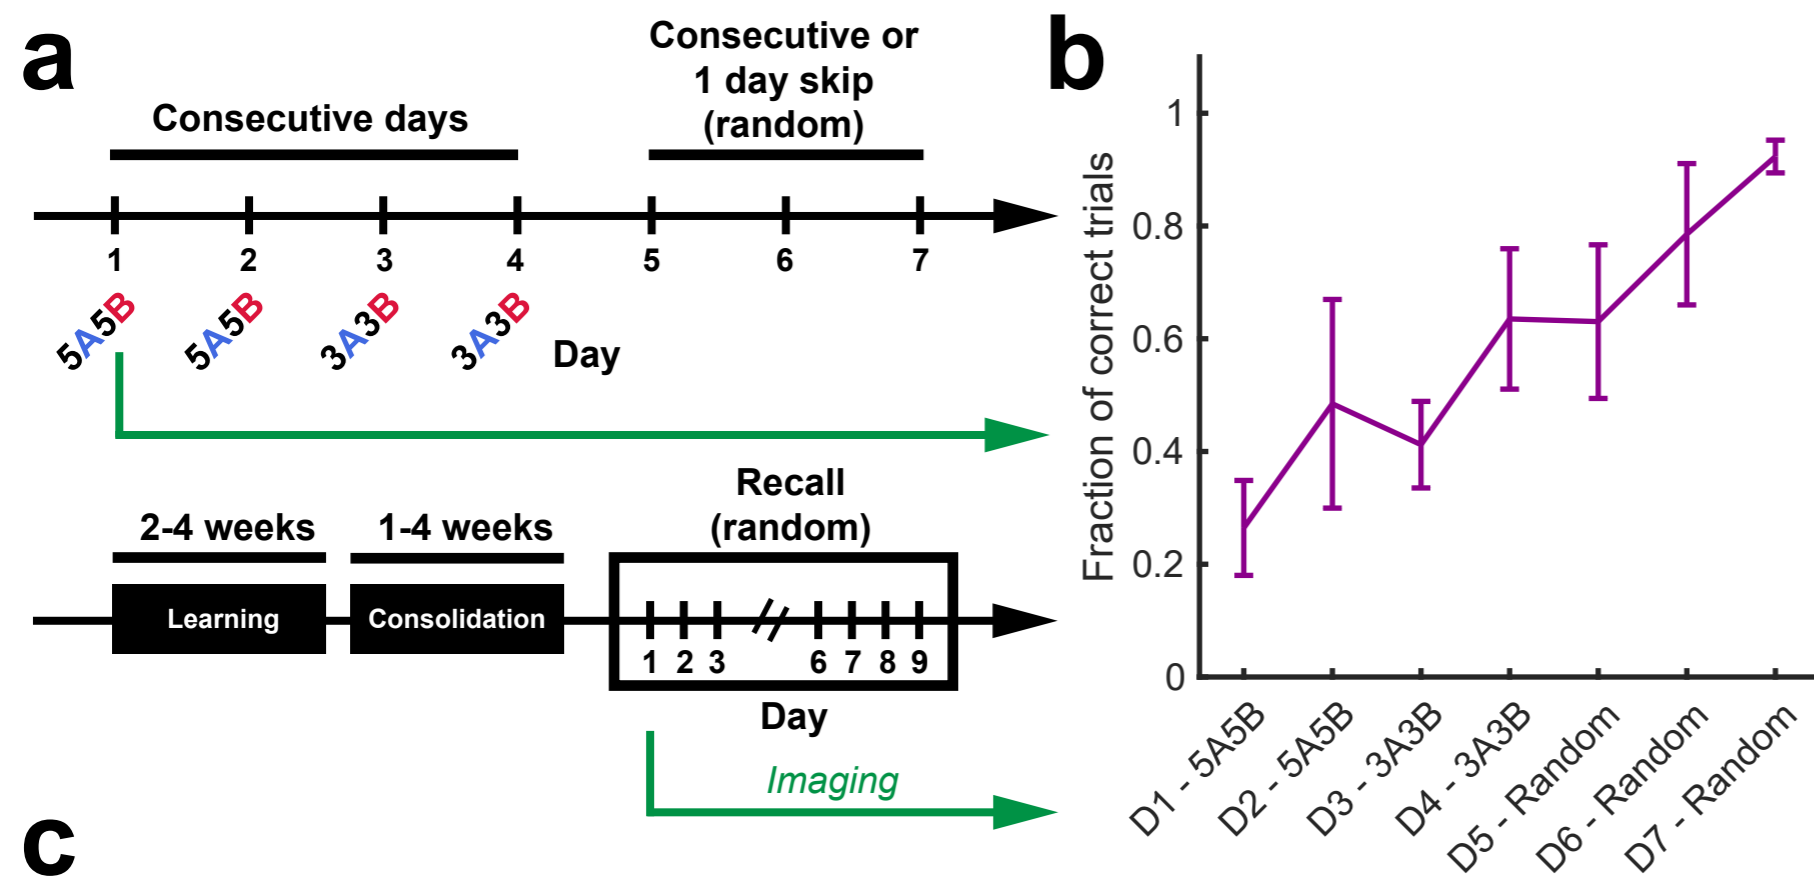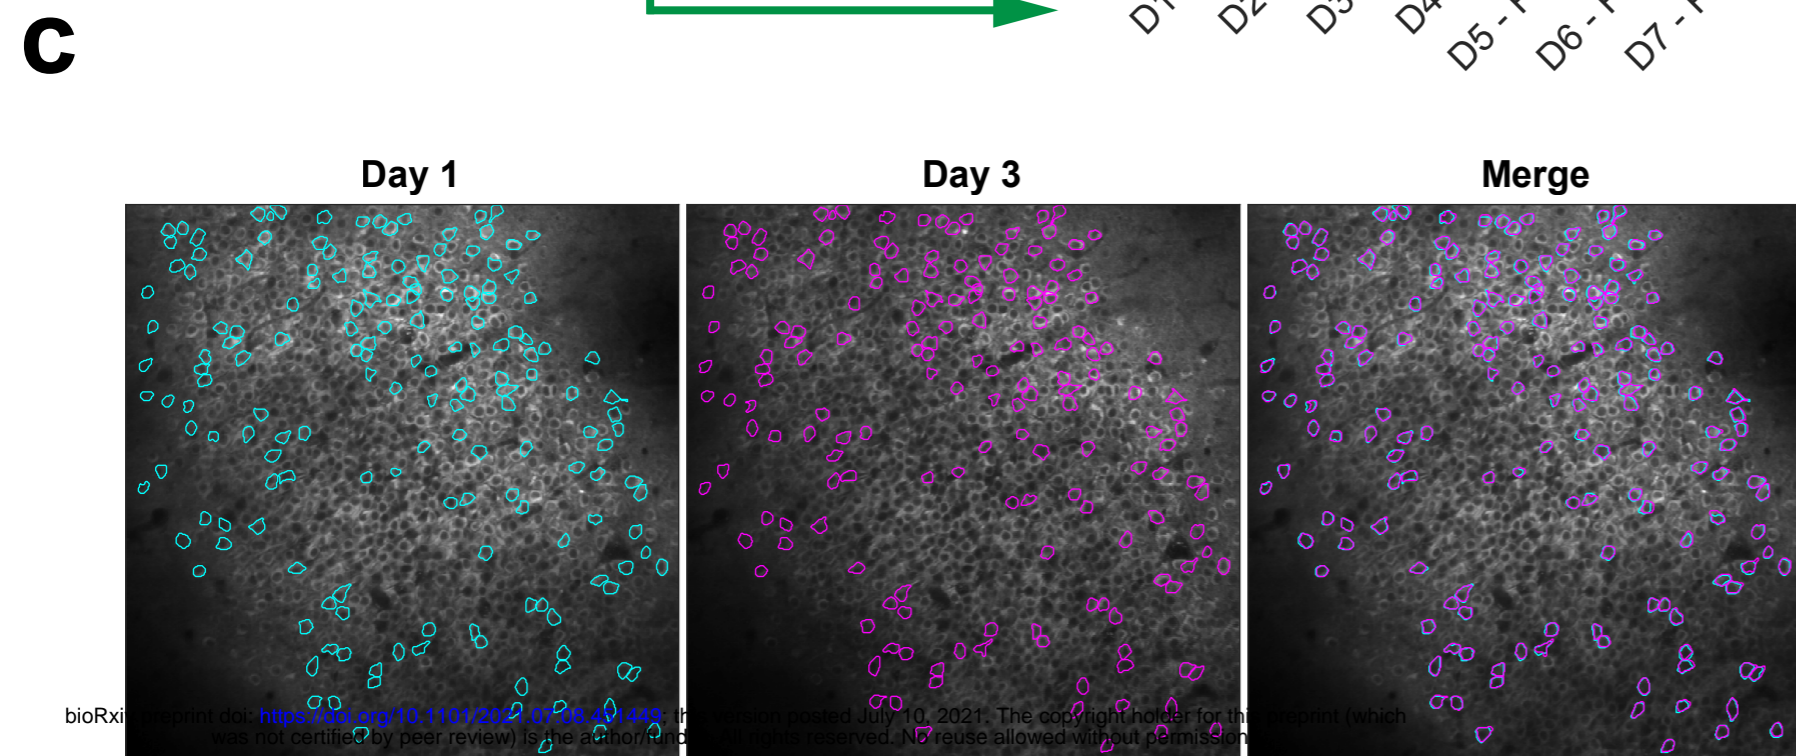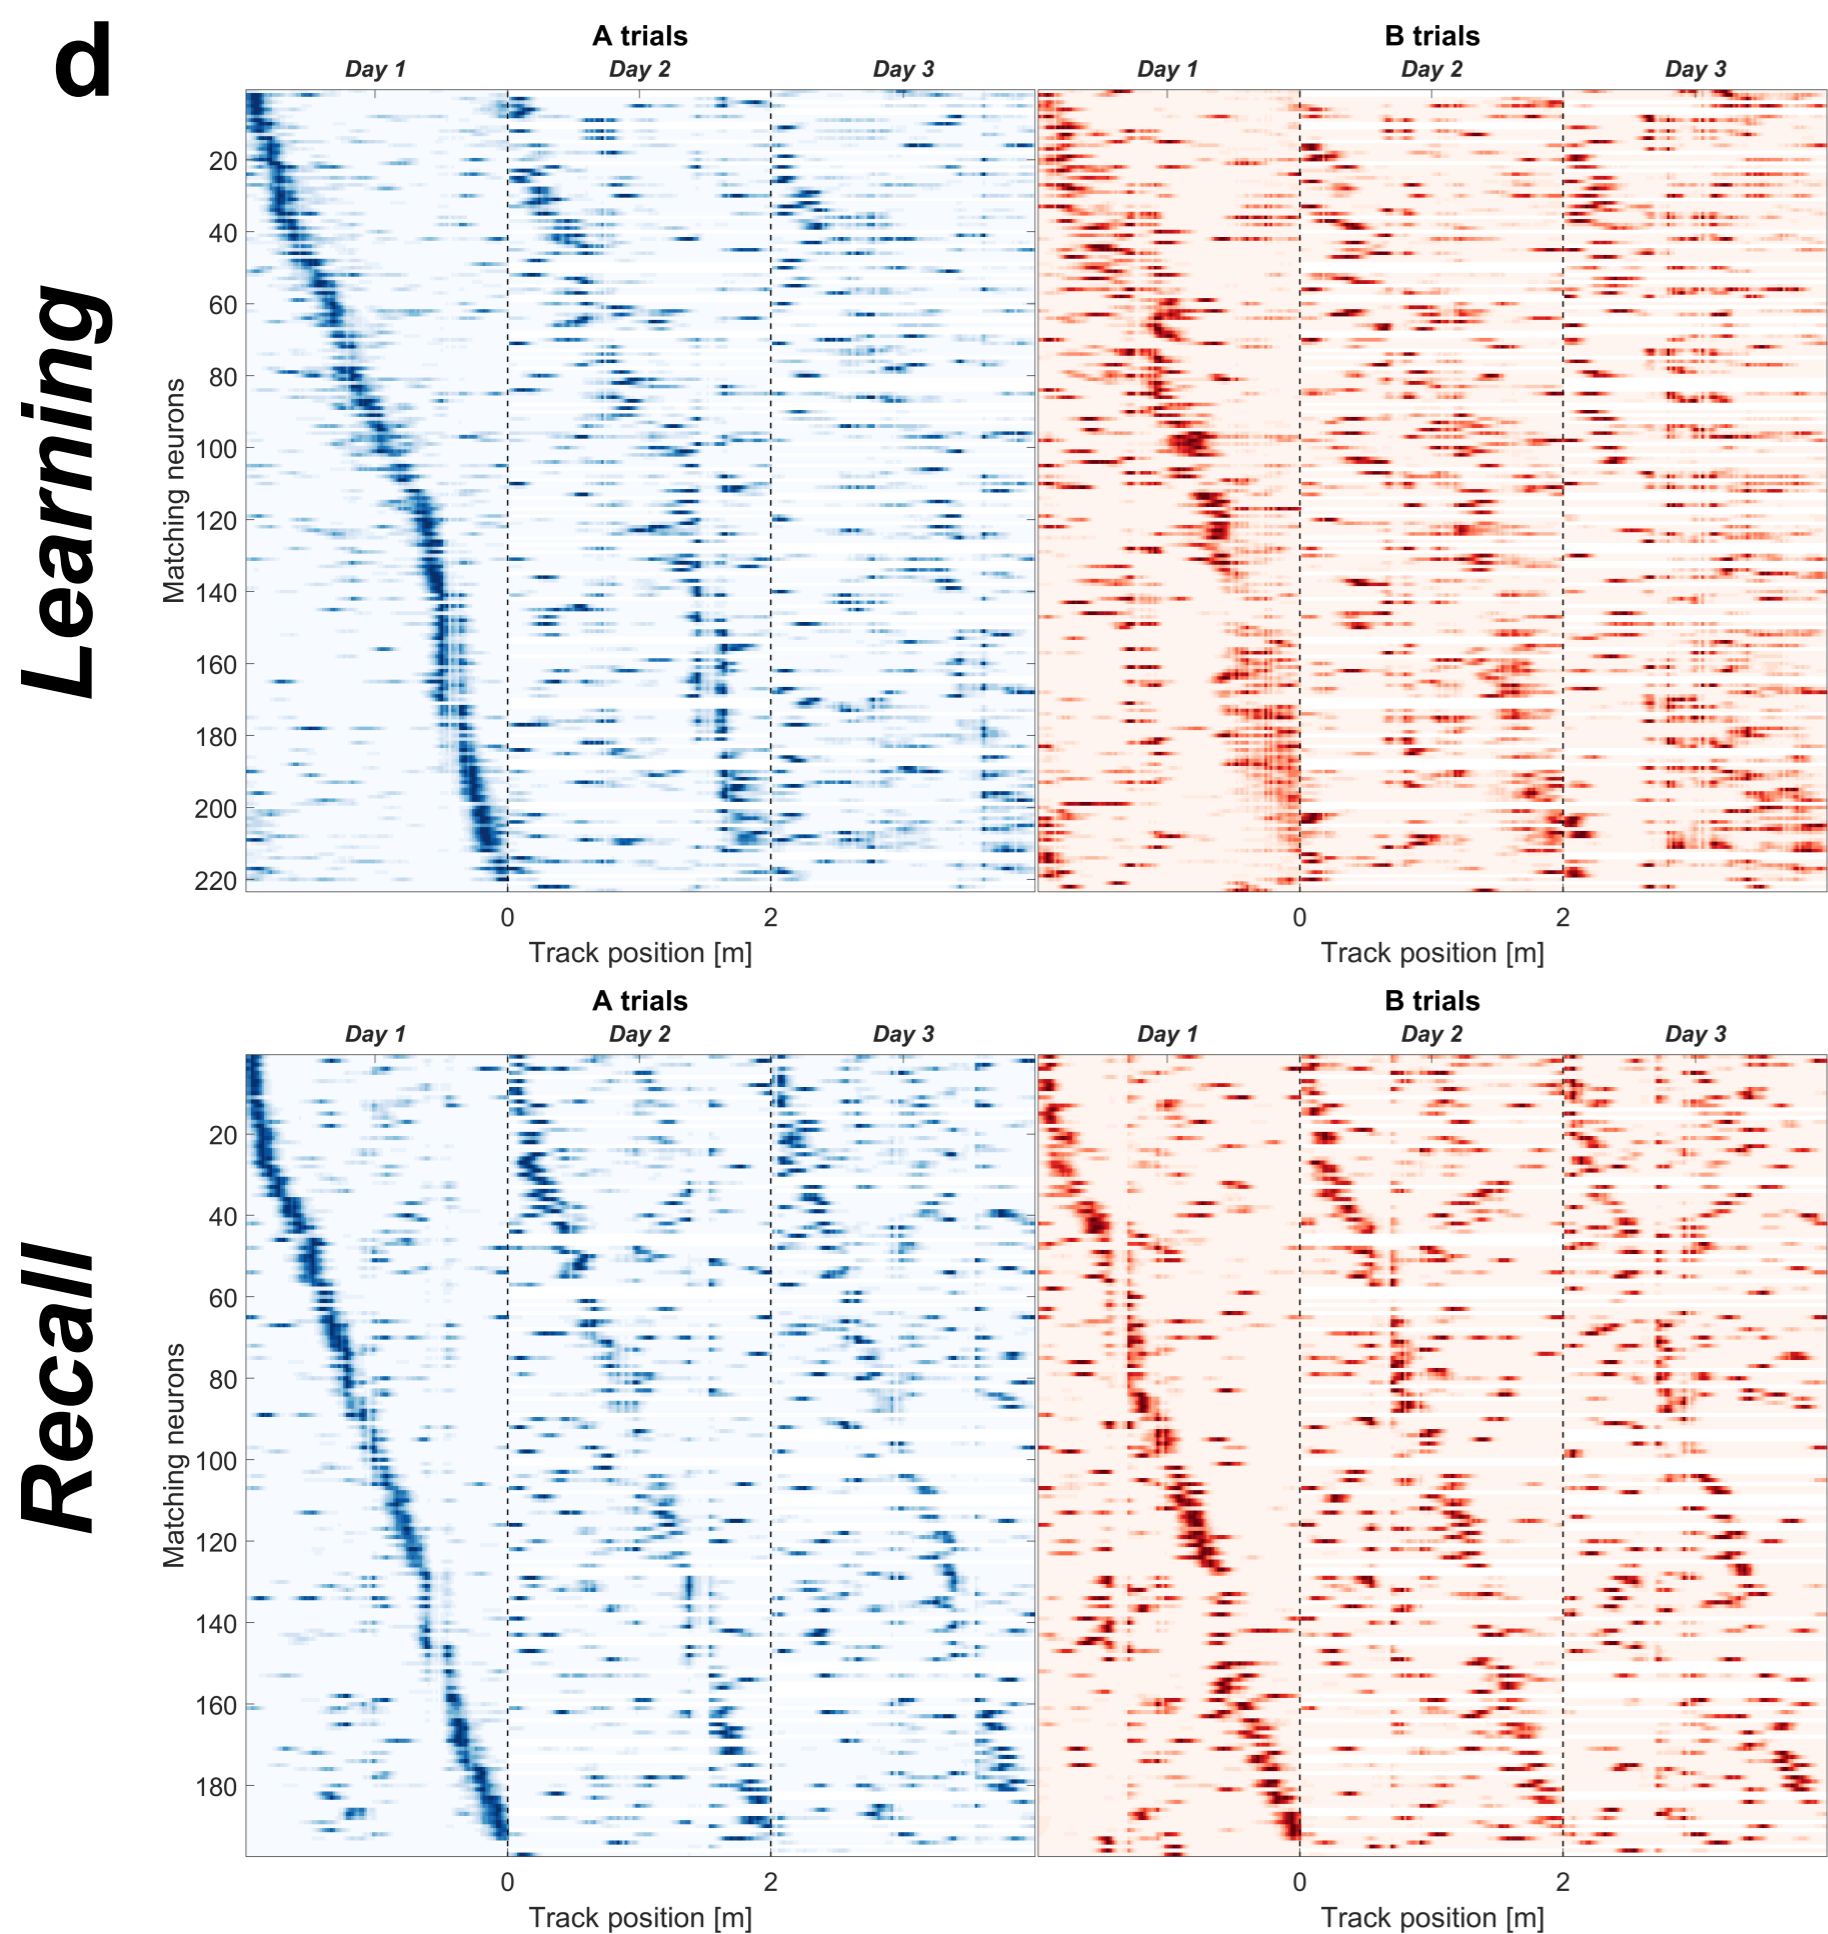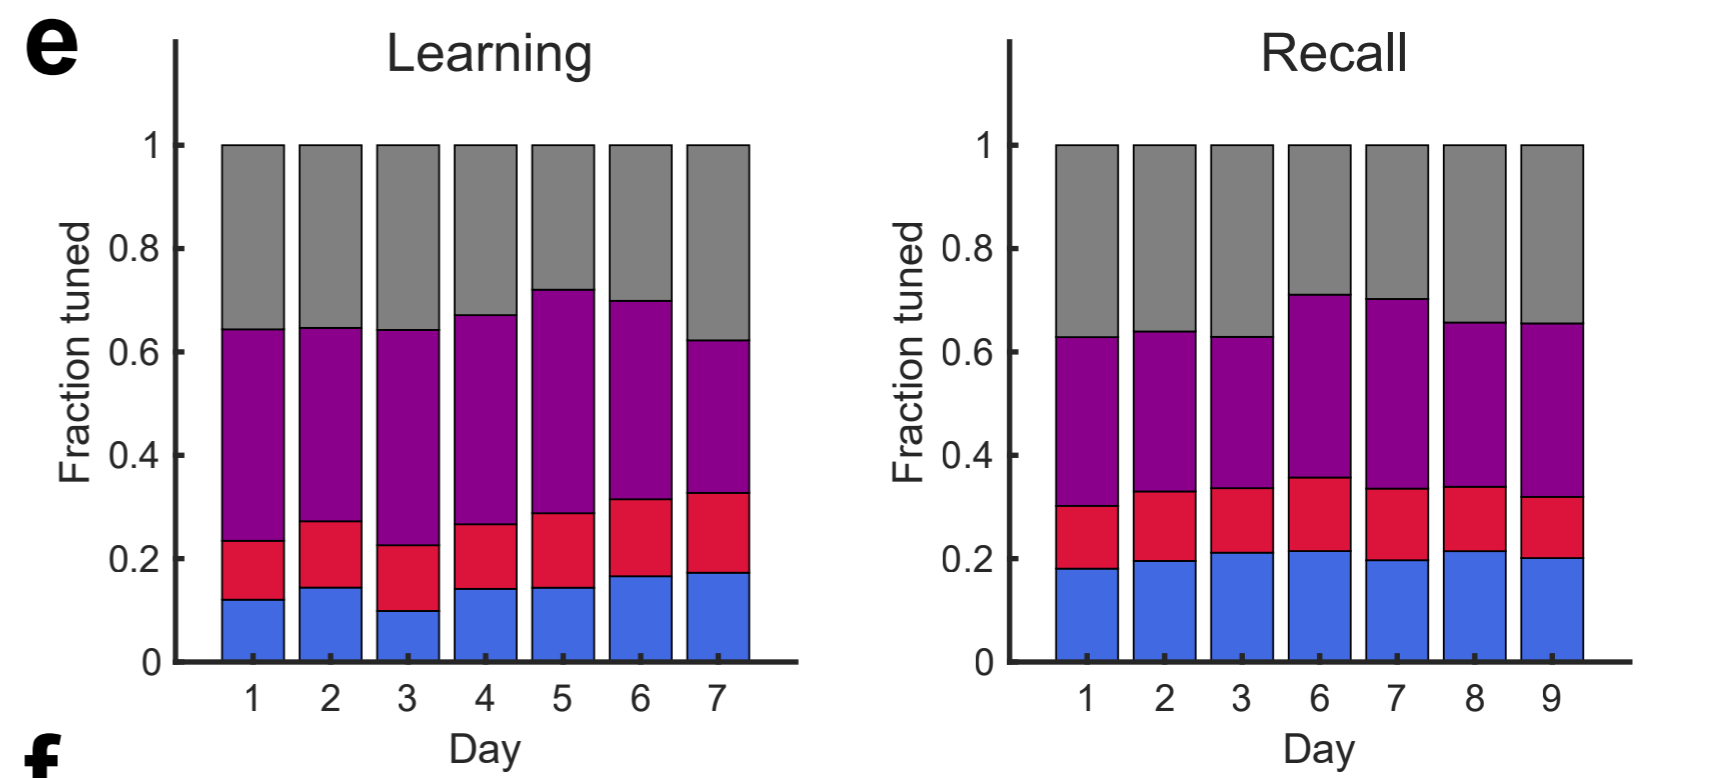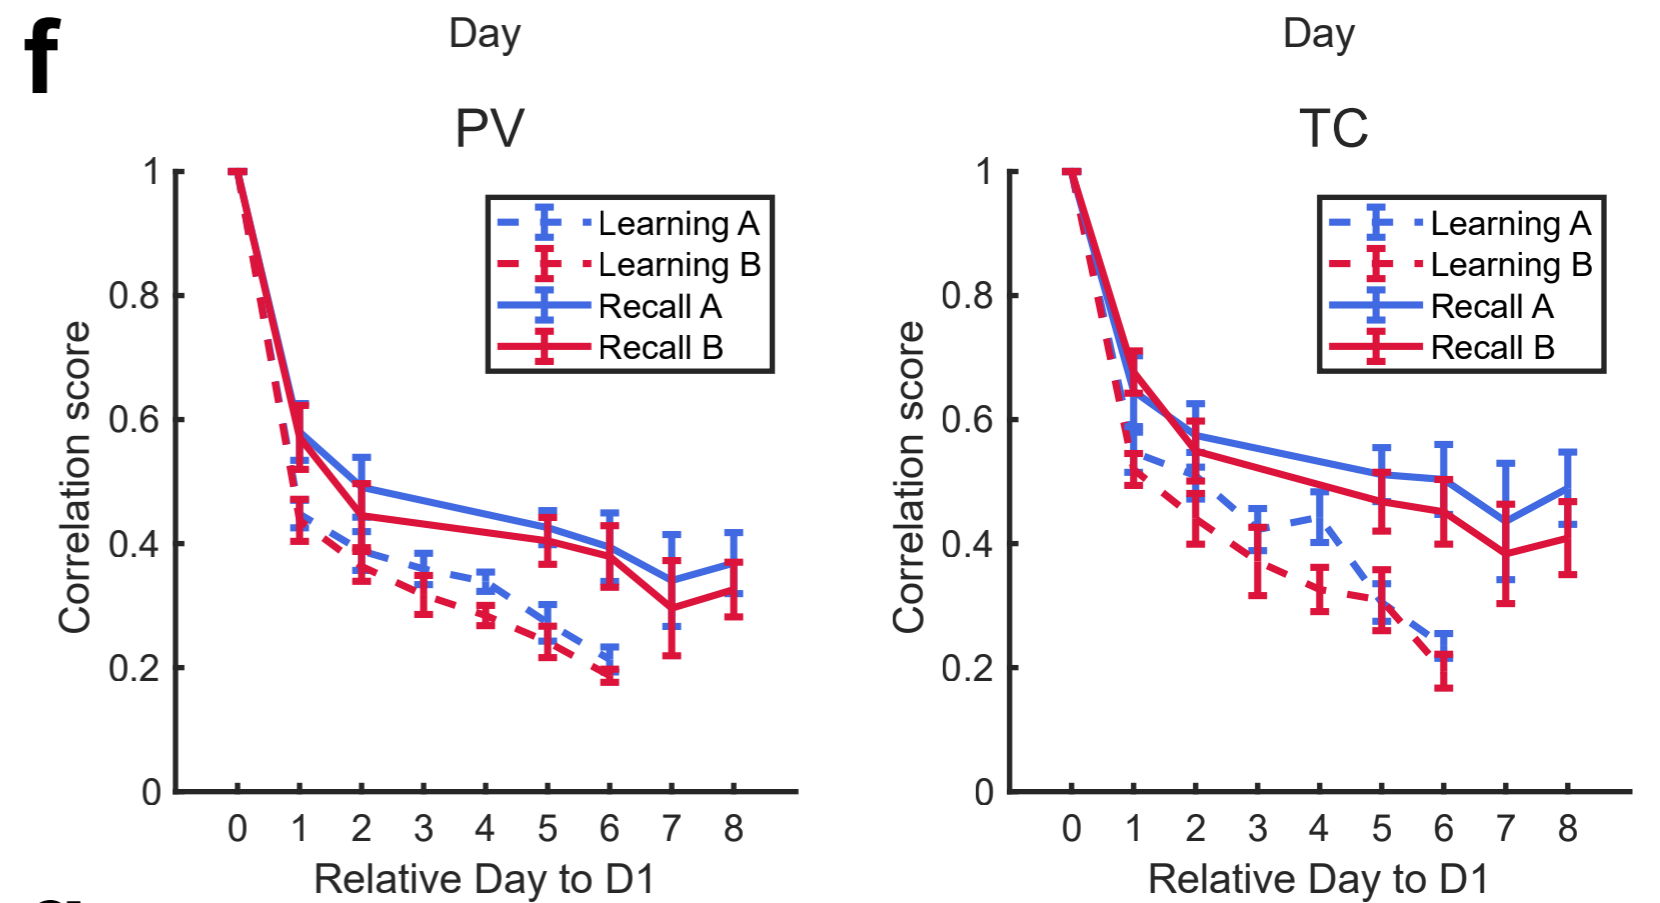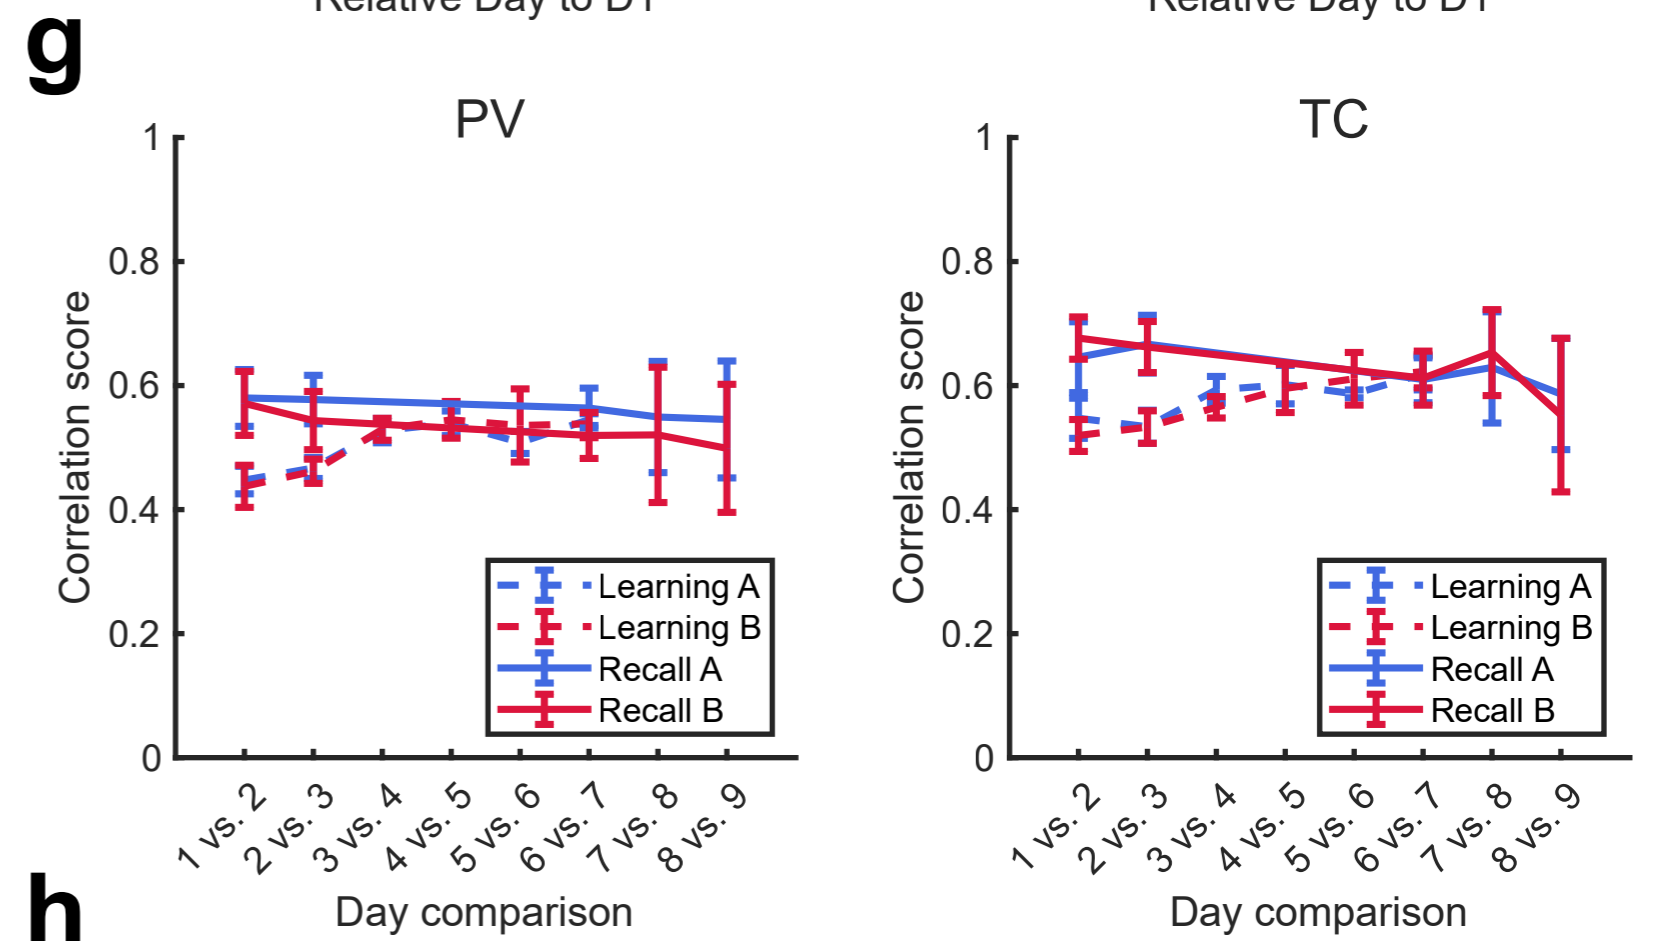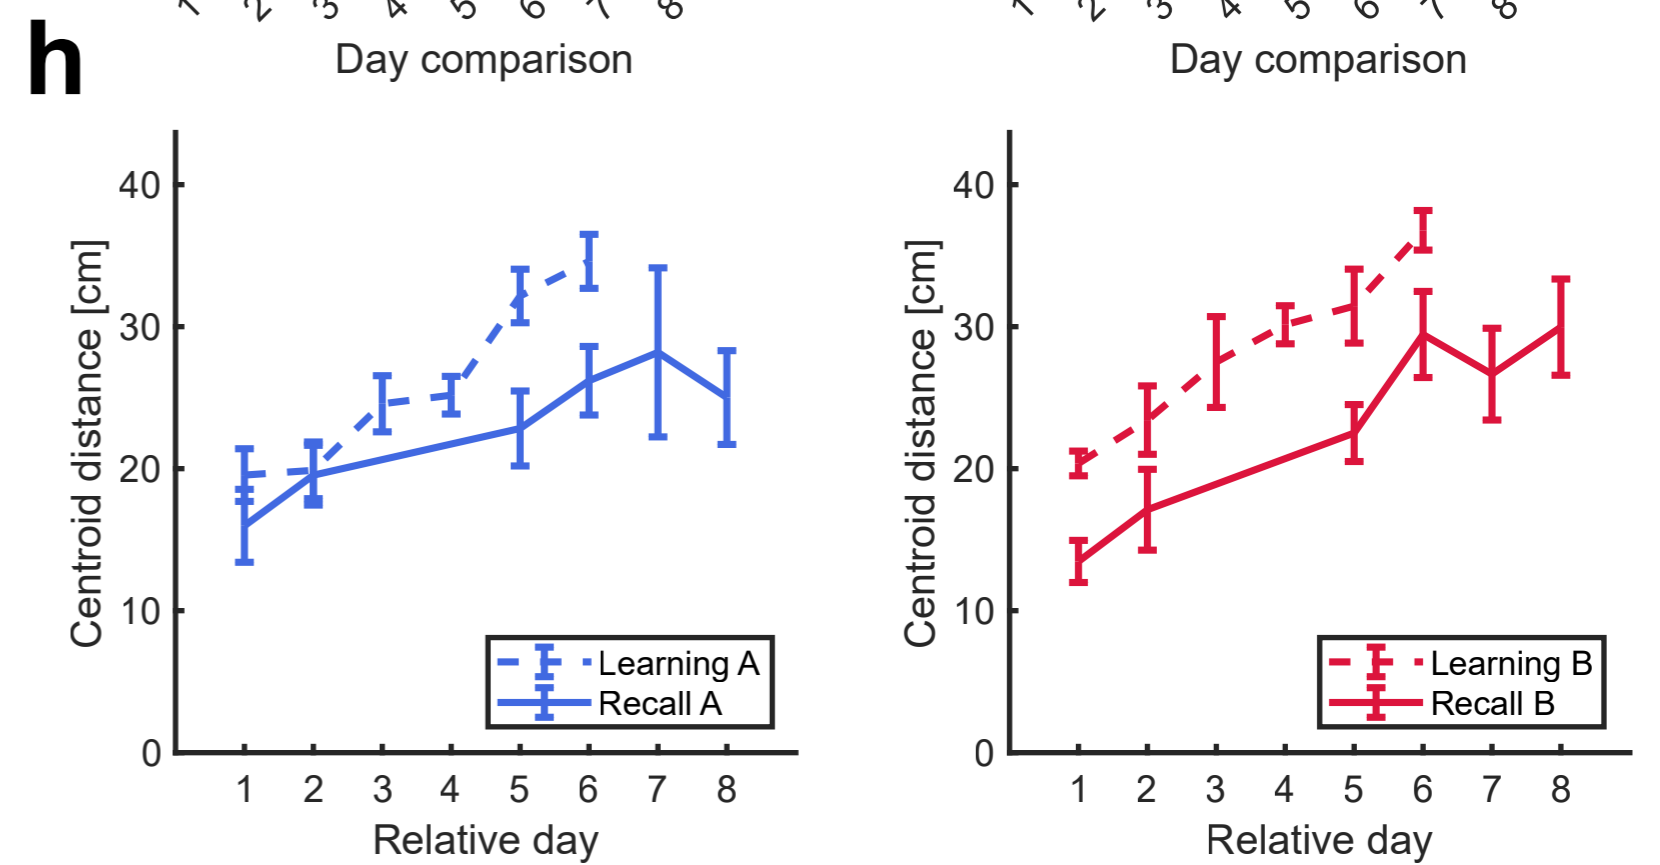

# Figure 5

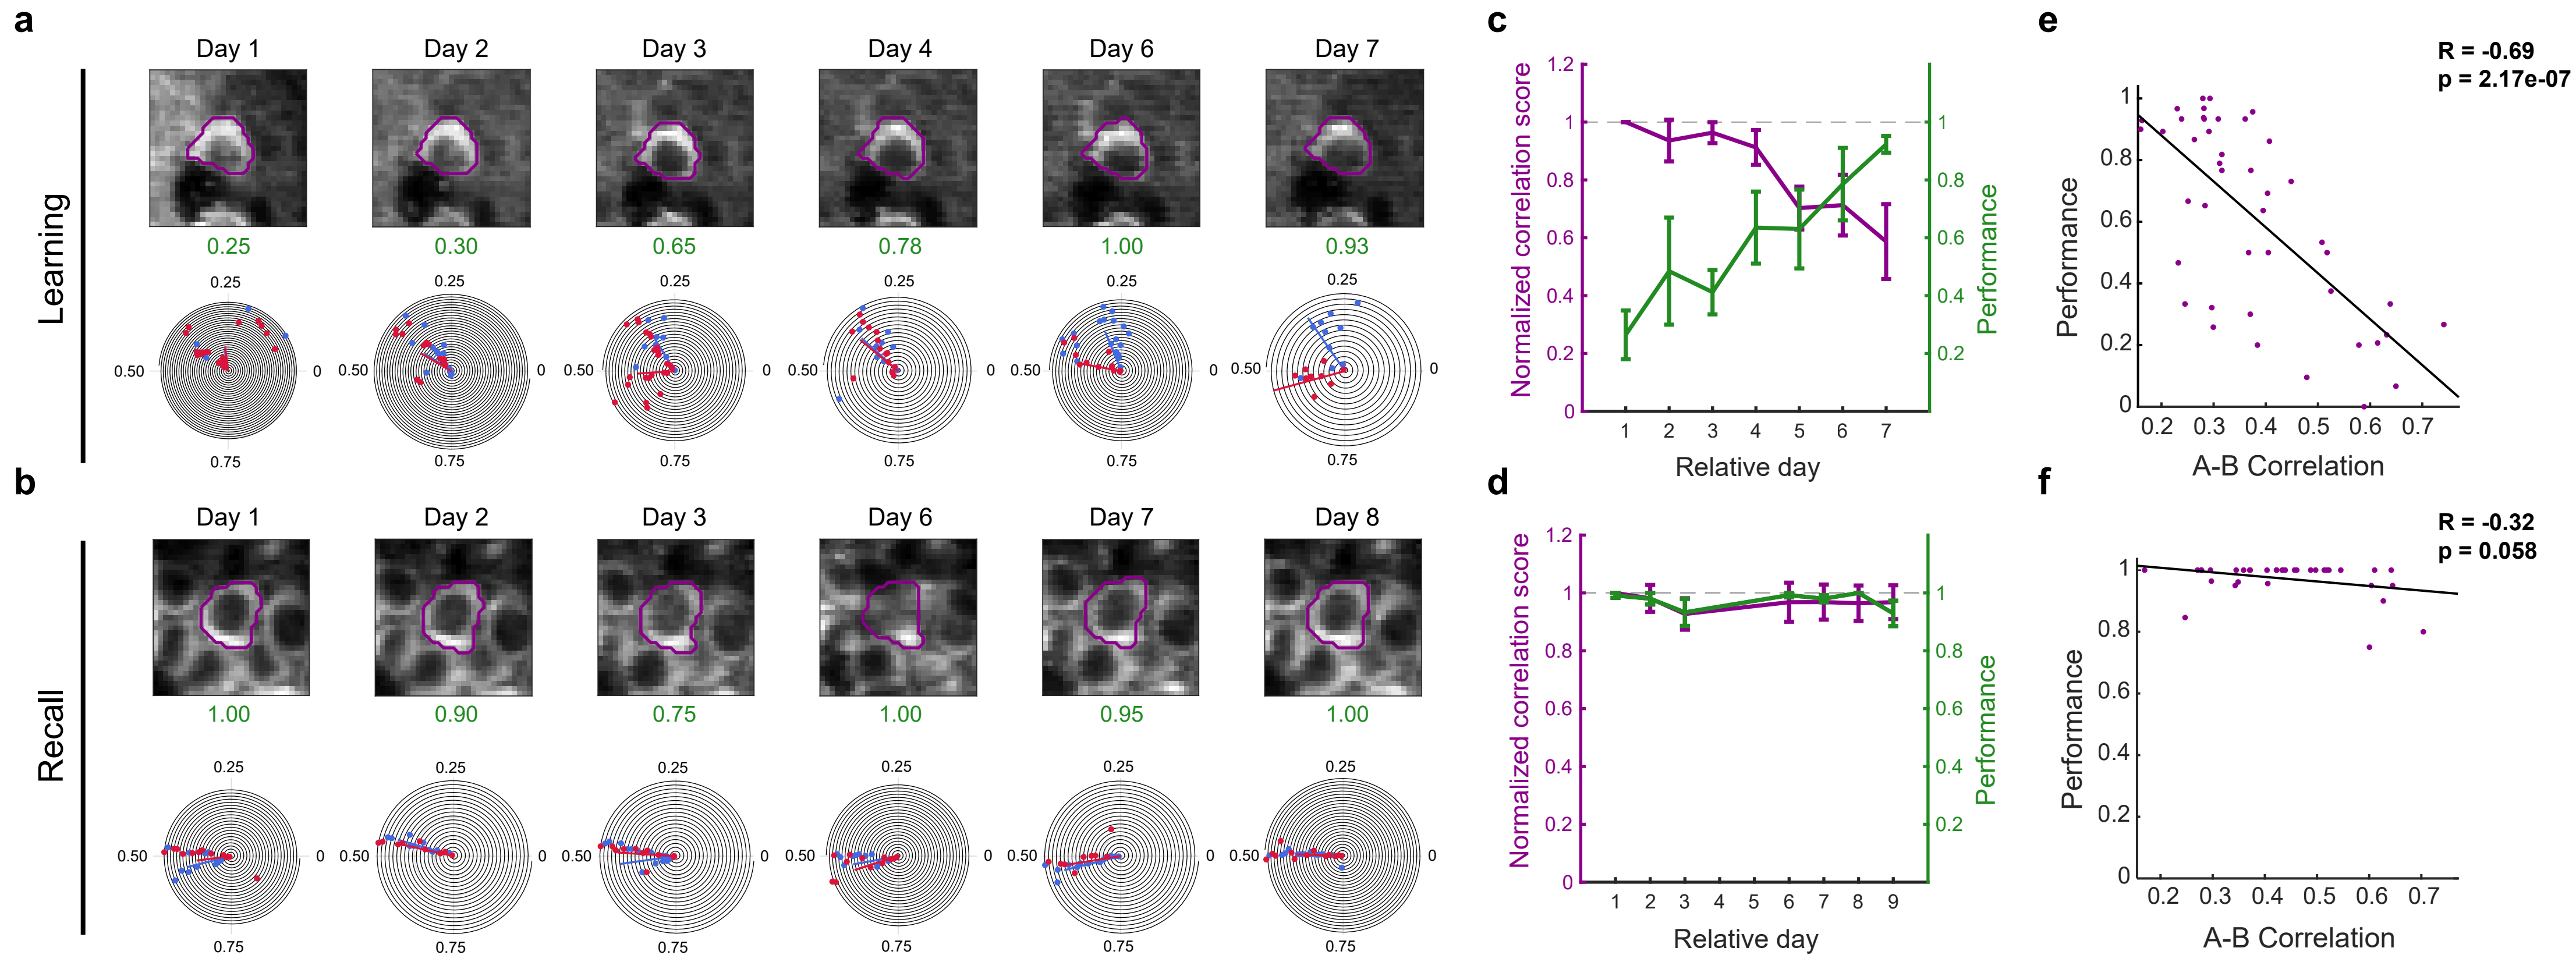

# Figure 6

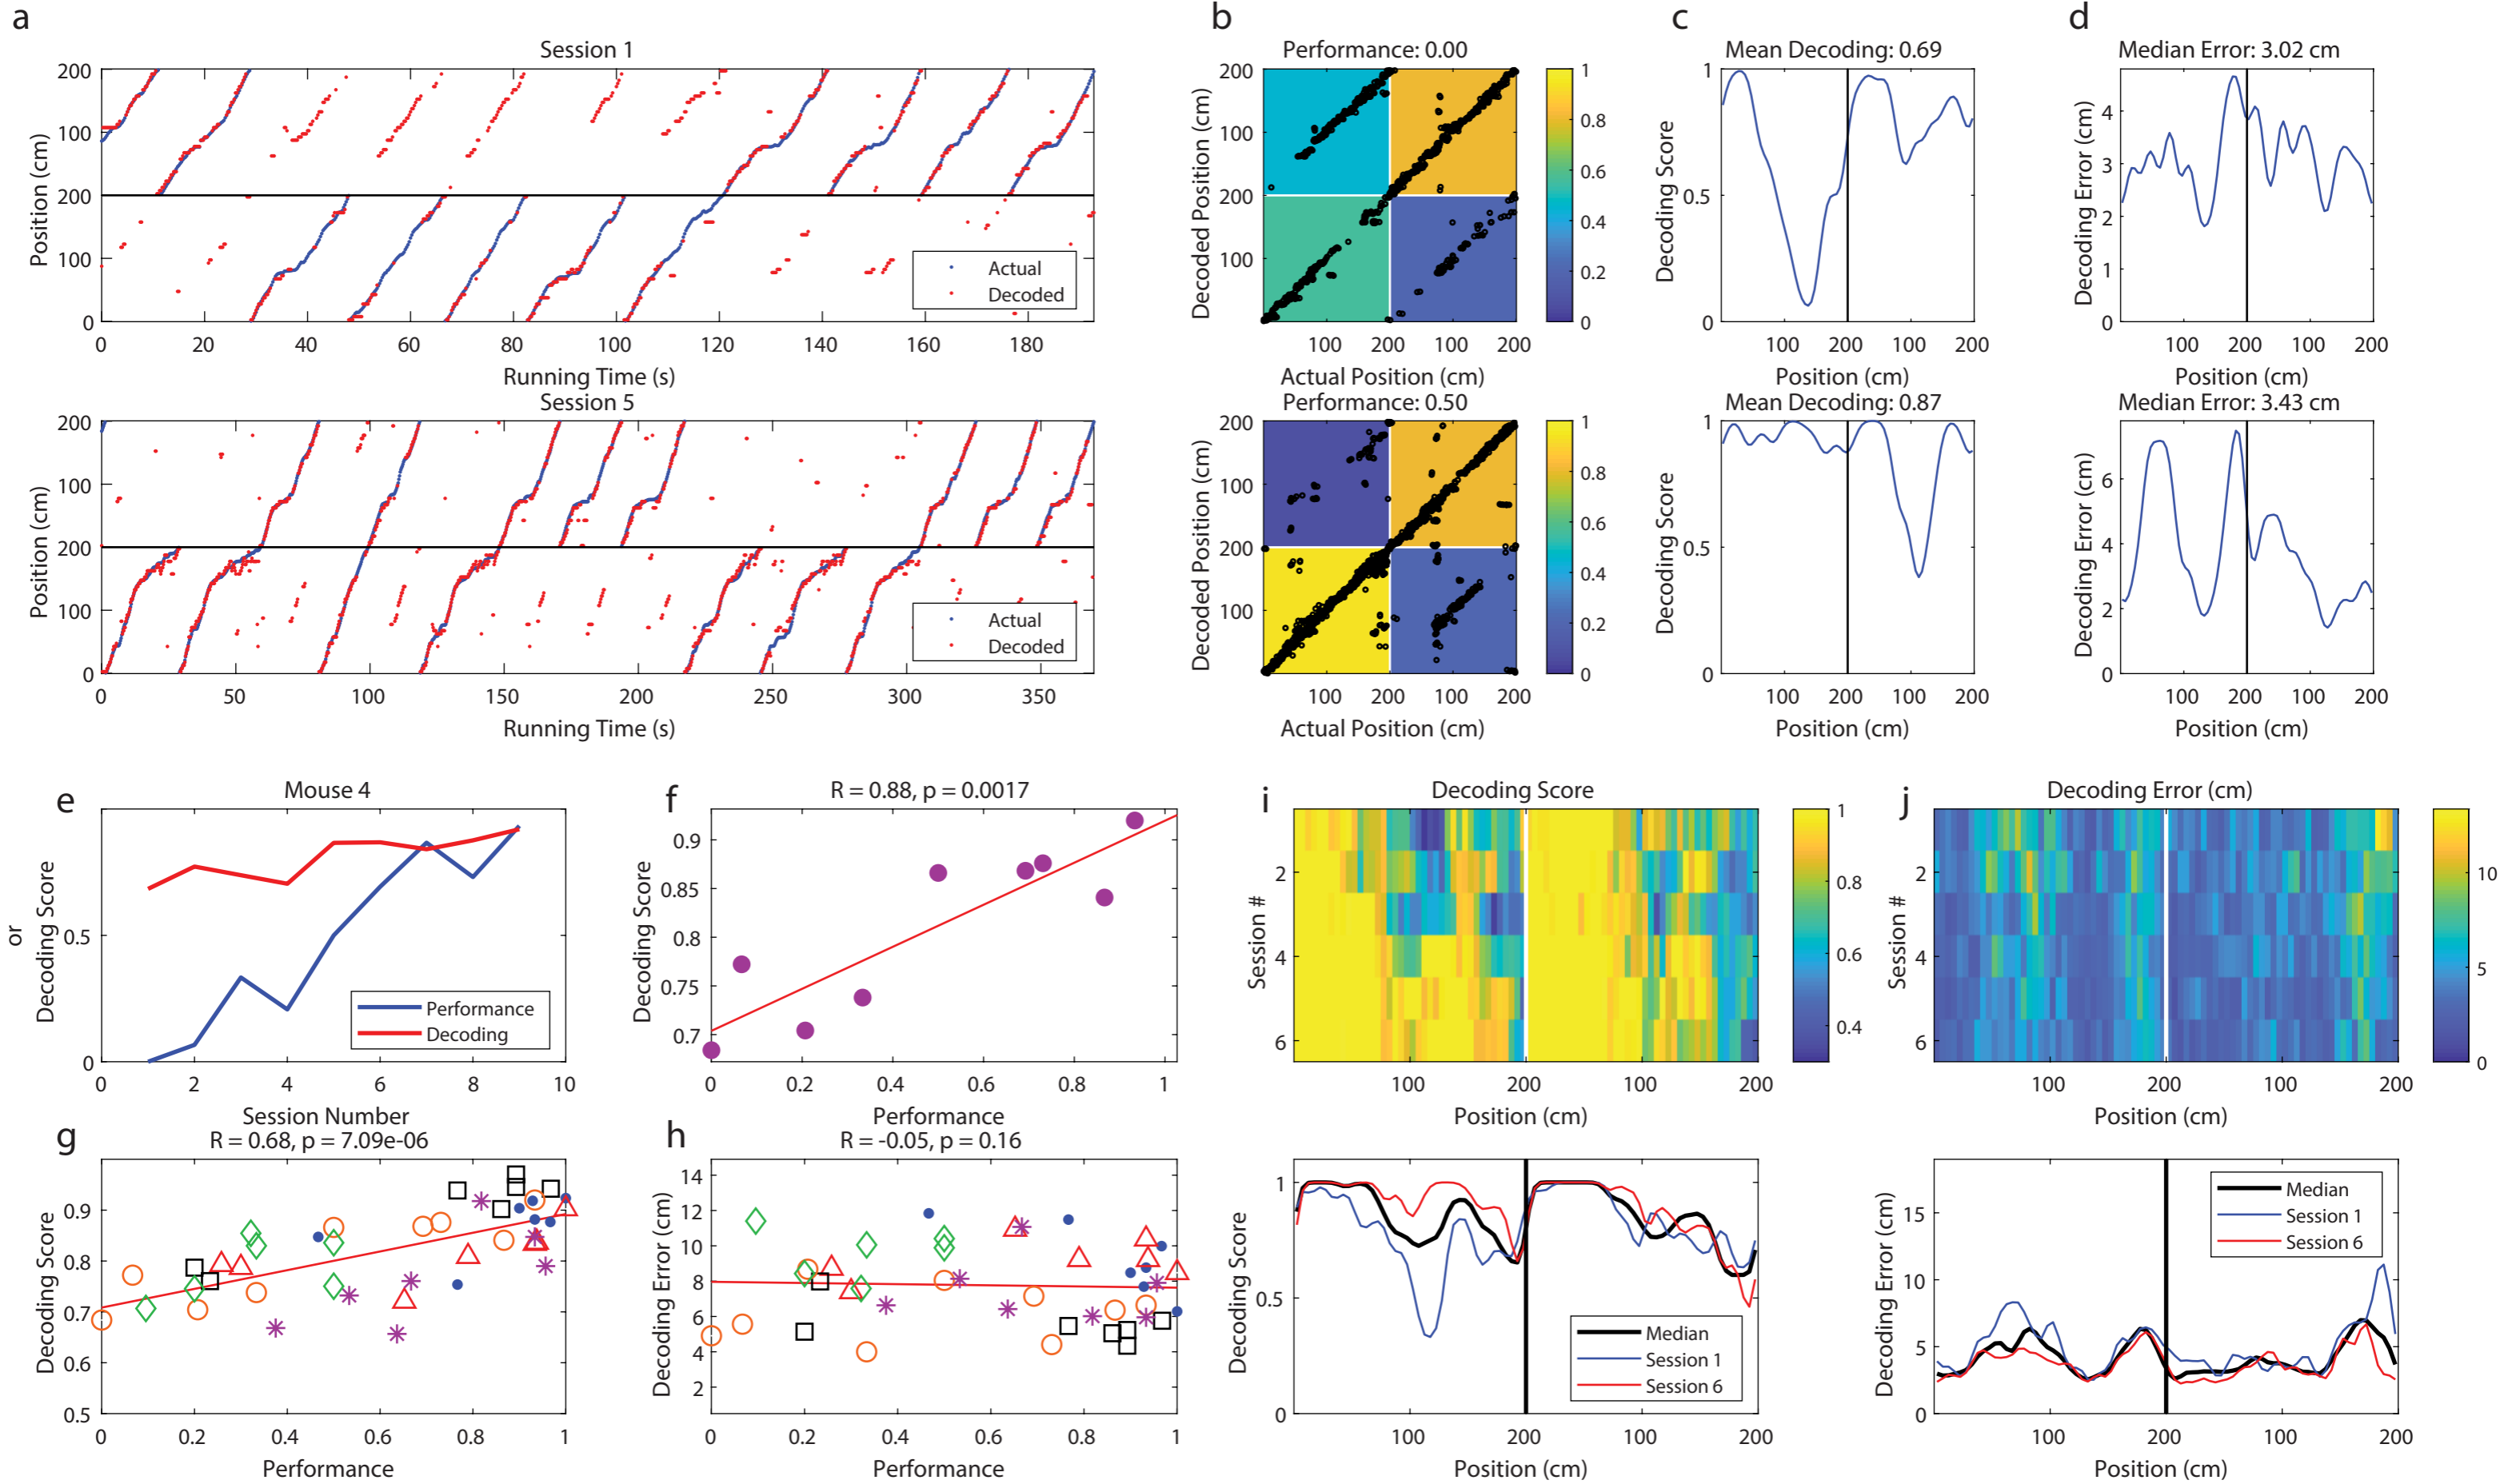

Source: https://www.biorxiv.org/content/10.1101/2021.07.08.451449v2.full.pdf
